# Supplementary material for: Morphologic, phenotypic, and transcriptomic characterization of classically and alternatively activated canine blood-derived macrophages in vitro
Source: PLoS One. 2017 Aug 17;12(8):e0183572. doi: 10.1371/journal.pone.0183572 (PMC5560737; doi:10.1371/journal.pone.0183572)
Supplement: S4 Table — Excel table. (XLSX) [file pone.0183572.s005.xlsx]

## Sheet: Tabelle1
S4 Table: List for the intersections of differentially expressed genes in the comparison of literature-based human and murine markers with canine M1- and M2-associated genes as retrieved by the present study (refer to figure 4).
57 elements included exclusively in "M1: human/mouse"	8 common elements in "M1: human/mouse" and "M1: canine"	392 elements included exclusively in "M1: canine"	1 common element in "M1: canine" and "M2: canine"	688 elements included exclusively in "M2: canine"	11 common elements in "M2: canine" and "M2: human/mouse"	44 elements included exclusively in "M2: human/mouse"	3 common elements in "M1: canine" and "M2: human/mouse"
CCR3	BIRC3	RHOU	PIK3CB	SCN2B	CCL24	CD28	P2RY14
FCGR1A	CCR7	CP		NPNT	CCL13	CD4	TGFBR2
ICAM2	CD80	IFI6		LYVE1	FCER1A	CSF1R	TPST2
LYN	IL15RA	IL6		CALD1	FN1	ITGAM
TAPBP	IL23A	CHI3L1		NDP	EGR2	ITGB2
TLR1	INHBA	ENPP2		LOC102152647	CA2	LRP1
CCL2	NAMPT	CCL22		GDA	LIPA	CCL17
CCL3	SLC2A6	EPHX2		IL13RA2	SLC4A7	CD209
CCL4		IL22RA2		FBP1	CD163	CD302
CCL7		CXCL14		LOC481325	ADK	F13A1
CD44		LOC102152163		MRC1	FGL2	IGF1
CXCL12		NUPR1		RRM2		IL1RN
FAS		CCL20		SHCBP1		MS4A4A
DLA-DQA1		CLU		DNM1		MS4A6A
DLA-64		NSUN7		NACC2		TGFB1
IFNG		NXN		MS4A2		TGFBI
NFKB1		SDC4		TSPAN7		CCL1
LOC608853		WNK2		JAM3		IL21R
APOL6		TNF		ANTXR1		ALOX15
ATF3		C18H7orf10		SCIN		ARG1
BCL2A1		BMP1		KIF23		CD14
CCL19		SERPINB6		KIF11		CD36
CCL5		TMEM150C		TGFB2		CERK
CCL8		ETS2		cfa-mir-125b-2		CLEC4F
CD40		FSCN1		CST9		CLEC7A
CXCL10		CXCR3		NUF2		CTSC
EDN1		ZNF462		CLEC4G		CXCR4
FCGR3A		NRP2		LPL		FCER1G
GADD45G		MOB3B		TMLHE		GAS7
HESX1		IDO2		CCNB2		HEXB
HSD11B1		PTGS2		RAB40B		HNMT
ICAM1		PI3		CDC6		HRH1
INDO		HS6ST1		CCNB1		HS3ST1
IFIT3		PDPN		C3		HS3ST2
IGFBP4		KMO		RAD51		IL10
IL12A		AHI1		EFCAB11		IL16
IL12B		GALNT3		DLGAP5		LTA4H
IL15		HOOK1		SPA17		LOC487114
IL2RA		VASH1		ARHGAP6		MSR1
IL7R		QPCT		ACSF2		P2RY13
IRF1		EBI3		KIF15		SEPP1
NOS2		LOC100855519		PPBP		SLC38A6
OAS2		MGAM		EDNRB		SLCO2B1
OASL		IL1B		ECT2		TLR5
PFKFB3		SLC36A4		MND1
PFKP		SGK1		MAOB
PSMA2		TMEM176A		CCNA2
PSMB9		CLEC5A		MORN2
PSME2		EOGT		HMGB3
PTX3		FAM86A		NCAPG
RELA		SELM		BUB1B
SLC31A2		DMXL2		ARHGAP10
SLC7A5		BAG3		TOP2A
SLCO5A1		LOC608687		FLT1
TAP2		LOC612059		LOC102152056
TNFSF10		MCTP1		ATP6V0D2
VCAN		CREB5		BUB1
		KDM4D		MYO1E
		SLAMF1		FAM198B
		SLC39A14		CDCA3
		SLC22A15		PTTG1
		LOC481634		ACTN1
		ZDHHC14		CA4
		F11		FKBP7
		ZNF608		ANPEP
		DGAT2		MYBPC2
		APBB2		PARP2
		CRYAB		LOC476070
		HAS2		ARSK
		AFMID		OMG
		LOC475755		ORC6
		HCAR3		TM7SF2
		IL17F		HMGCS1
		BCAT1		TBC1D19
		DUSP10		IRF4
		TRAF3IP2		FAM185A
		C1S		CSNK1G1
		NUBPL		PMP22
		DCUN1D3		FANCD2
		TSPAN9		CCDC62
		MGLL		FTH1
		FAM3B		RALGPS2
		SLC31A1		DYNLRB2
		TMBIM1		DHRS4
		FFAR2		BAALC
		SLC43A2		TCTN2
		STEAP4		MIS18A
		BCO2		STYXL1
		LIMS1		CBR3
		CNN3		ACSS3
		IRAK3		FBP2
		ARHGAP31		SLC43A3
		VWA5A		PEMT
		IL1A		BBS5
		GPR84		WHSC1
		TTC25		PROS1
		LARGE		SLC5A6
		ATP1A4		TMEM67
		GLT1D1		MPZL1
		FAM110A		FLRT2
		CECR1		COQ7
		LOC100855949		RACGAP1
		KCNJ2		C27H12orf5
		WDPCP		ARRDC4
		FHL2		L3HYPDH
		SERPING1		DST
		PARD3B		FOXM1
		GOLGA2		TTC8
		KIAA0513		SLC15A1
		TNIP3		TMEM17
		PGS1		MYL4
		MTHFS		SLC25A43
		SULT1A1		ADCY4
		CXCL8		ASPM
		SH3PXD2B		BPHL
		VEGFA		PSPH
		KYNU		UBE2T
		LOC100687377		BIRC5
		PLEKHA8		TIE1
		ARFIP1		PKIB
		APLP1		RIBC1
		SNX10		BCAT2
		PPAP2C		TTLL1
		MAP3K5		KIF20A
		GSTA3		CCNE2
		MCTP2		CRYL1
		TMEM132A		SCHIP1
		SOD2		SCG5
		SLAMF8		LOC611720
		IL1RAP		FAM54A
		LRRK2		EBPL
		SRXN1		FAM129A
		XDH		MCM10
		PLXNA1		MLF1IP
		EMR1		KDELR3
		C7H1orf21		PLXNA2
		MGST1		TPM2
		CCDC50		DZANK1
		RHEBL1		TTK
		LOC476045		ANKRD6
		AKAP2		KDELC1
		PPP1R26		AP1B1
		CLEC4D		CD200R1
		ST7		PARP3
		SH3BP2		ALDH5A1
		YTHDF3		CDK2AP1
		TMEM176B		MXRA7
		EVI5		FABP3
		AP2A1		FAM173A
		LOC100686271		TSPAN4
		S100A2		UHRF1BP1L
		IKZF4		IDS
		IGSF10		C1H9orf3
		IL27		LOC102156419
		DENND5A		NUP93
		C2 /// CFB		KNSTRN
		RND1		MCAT
		CD38		PTRH1
		ARHGAP24		LOC607054
		PTGES		PLA2R1
		TMEM41B		CCDC146
		DPYSL2		PDGFC
		NCF1		CDCA2
		RAB20		PAFAH1B3
		PLK2		RHNO1
		PKIG		LOC475240
		PLAU		MAN1C1
		APLP2		CENPK
		P2RX2		WRB
		CBLB		BANK1
		ST3GAL5		CCDC80
		GSAP		BIVM
		SOX5		RRP8
		MRAS		CDC20
		LXN		NDC1
		STBD1		C18H11orf49
		CPEB4		LOC102153596
		MFGE8		SLC23A2
		FAIM		GPSM2
		ZBTB10		SERPINB5
		ITM2C		ATP11A
		CDV3		TPX2
		MCOLN2		DBN1
		GLUL		CA5B
		PDE7B		GALM
		SOAT2		CDC45
		LOC100685493		PIK3CG
		SLAMF7		CD244
		NINJ1		TMTC4
		ARRDC5		AP1S2
		SCCPDH		CENPH
		SLC6A8		CHSY3
		ZDHHC18		S100A10
		SERPINB9		HMGCR
		REPS2		S100P
		AK4		TSC22D1
		GRN		PANK1
		ENPP5		NCAPH
		STARD3NL		MTHFD1
		MBD4		PCK2
		MS4A7		CIT
		ECSCR		XPNPEP1
		RAB4A		NUSAP1
		LAP3		CASC5
		PHACTR4		CAMTA1
		GCLM		RAD51AP1
		ZHX1		NDC80
		RAD21L1		ABCA8
		SCARF1		UST
		F11R		GPC4
		TMX4		IFT43
		TTC39C		CYB5R3
		MAFF		TMEM109
		CCDC22		PHP
		SHROOM1		SLC26A2
		PANX1		SPC25
		PLA2G4A		CCL14
		SIPA1L2		PARPBP
		NPC1		LYRM7
		HSP90AB1		DUSP23
		ASPH		CKS1B
		LOC476879		WDR11
		ARHGEF12		MIPEP
		CCDC17		DIAPH3
		STX2		GFPT1
		NLRP3		SIGLEC5
		AHCYL2		HYAL1
		DAGLB		AVEN
		GSK3B		SLC9B1
		PLAUR		CDKN3
		STX3		BST1
		KBTBD7		PHYHD1
		MAP4K4		BCAR3
		MCPH1		HDHD2
		DLA-79		BPNT1
		TEX12		AP2A2
		EIF5A2		SMC2
		DESI1		C27H12orf10
		KIF1B		SPAG5
		ZCWPW1		GSTM1
		BHLHE41		ITGA7
		ADPRH		RRM1
		TNFAIP3		MCM5
		CD300LF		LRP4
		SEMA4B		E2F2
		HOOK2		CHN2
		LOC608975		ODF2L
		CDC42EP4		BRCA2
		42064		SESN3
		AHR		TRIP13
		PPP1R3B		ASGR2
		PEA15		CENPE
		XKR8		CD84
		SFT2D2		KIFC1
		TMEM51		SORT1
		TMEM229A		EMR4
		NCF4		CENPL
		CSNK1G3		STEAP2
		CRKL		TNFAIP8L3
		ABCD3		SCARB1
		EXOC6B		AUNIP
		FAM49A		LOC476006
		NFKBIB		CARS2
		NIN		ALDH18A1
		HECW2		BCS1L
		PAG1		ALG14
		RALGDS		GPR34
		LOC488214		DEPDC1B
		SNX27		PFDN6
		MYO1C		RYR1
		PRDM1		MYBL2
		PRR5L		TUBA1C
		TBC1D23		TPMT
		TBC1D9		AURKB
		MYBPH		HGSNAT
		ZC3H12C		LOC479820
		B4GALT3		TM6SF1
		ADRB2		LOC100855754
		SLC11A2		MELK
		PDZD8		ERCC6L
		MVP		KIF22
		CD82		DCK
		KLHL21		LOC609615
		ZFAND2A		ENTPD5
		GBP6		CCBL1
		ZFAND4		APEX1
		NEK6		ULK4
		DNASE2		CDK1
		LPGAT1		GINS1
		ID3		PLXND1
		ST18		SKA3
		ERI1		G6PC3
		ADAP1		FAM136A
		CDYL		DCTPP1
		ACVR2A		FARSA
		ADORA2A		CENPN
		FPR2		BCHE
		TTC39B		CISD3
		ABI1		MACROD1
		FAM26F		ZWILCH
		UBTD2		MRPL51
		MAPK14		SLC20A1
		IMPDH1		CCNE1
		SPIN2B		PLCB1
		BACH1		TYMS
		TBC1D1		CENPT
		PRKCSH		NSDHL
		RILPL2		LOC100856570
		CCDC101		CCDC30
		CMTM4		PRADC1
		DOK3		ADAM15
		FAM175B		MRPS15
		SCG3		SPC24
		AOAH		MECOM
		RHOH		E2F8
		MIER3		MVD
		LOC478288		KNTC1
		MAP2K2		ECE2
		TMEM150B		FANCM
		LATS2		TCHP
		L3MBTL3		SSSCA1
		LOC483833		SPR
		C14H7orf41		DSN1
		CD83		NEIL3
		FAM69A		MATK
		PDE4B		SUV39H2
		VPS41		MRPL17
		ZNRF1		KIF18A
		LPIN2		COQ10A
		CD72		BATF3
		MTPN		LOC480601
		TCF25		MRPL4
		TNFRSF13B		EEF1E1
		SIK3		PRC1
		TNIP1		PHPT1
		LOC100686256		ISPD
		GSR		CENPF
		NUS1		C18H11orf24
		ACSL1		RCC1
		DFNA5		SGSH
		VPS37A		CMSS1
		FAM111B		ALAD
		SCARB2		BLOC1S5
		REEP3		HK1
		SYS1		SLC25A13
		SGSM3		GPR110
		SUCO		TIAM1
		FMNL3		TREM2
		ERO1LB		GINS4
		NFKBIZ		AURKA
		PPP2R5A		CNTLN
		STIM1		SLC25A39
		MALSU1		PCP4L1
		RAB11FIP4		OSGEP
		STK10		CCNF
		TOR1AIP2		SETD7
		LOC476007		REXO2
		PLAGL2		CEP55
		BATF2		BMP2K
		PTPN1		SLC27A6
		NCK1		MMACHC
		NPEPPS		ALDH7A1
		SEMA4A		B3GALNT2
		LIMK2		ESCO2
		RAB8B		DHFR
		FBXW2		CEP164
		ELL2		FERMT2
		OSBPL6		NUDT19
		RAB12		GCNT1
		APP		IFT57
		SERPINA1		ISOC2
		TMEM57		WDFY3
		LOC102155693		MRPS10
		FAM172A		TTLL11
		RNF19B		YIF1B
		CLEC4E		CSDA
		MYH11		BRD8
		HIPK1		TFB1M
		STX11		MRPL28
		IL10RB		CBX5
		ACCS		STAB1
		SND1		GGCX
		YPEL5		TRMT61A
		REL		INTS4
		ARPC1A		MRPL12
		NFKBIA		IMMP2L
		RASSF4		EFCAB10
		MED18		IARS
		LOC100856167		FLVCR2
		NFKB2		NAV1
		SLC41A3		TSEN2
		PIK3CD		RANGRF
				RPF2
				PREPL
				AKAP3
				SMC1A
				MECR
				UBE3D
				PSAT1
				PICALM
				C9H9orf117
				IMP4
				BYSL
				MYOF
				SCD
				PPT1
				TXNDC5
				C18H11orf48
				EPHX1
				ACOX1
				FXYD1
				GOLM1
				LRRC46
				SLC37A2
				NDUFAF2
				CENPP
				KLF4
				HYAL3
				BOLA3
				S100A4
				LOC608703
				SCFD2
				PITRM1
				FBXO5
				ARHGAP11A
				MRPL37
				GUK1
				WDR12
				NAA38
				CHEK2
				PHYKPL
				METAP1D
				SCRN3
				KIF19
				MDH2
				ABHD1
				CYB5A
				LOC477352
				SRD5A1
				ILF3
				DENND4C
				QTRT1
				KNOP1
				PCCB
				HECTD2
				C10H12orf66
				EXOSC5
				RPP30
				PRKAR2A
				ACACA
				TDP1
				SLC35G1
				TMEM209
				C26H12orf52
				RRP12
				WDR46
				MAN2A1
				MYCBP
				CCDC106
				RANBP1
				SLC25A35
				SCD5
				RTN4IP1
				ZMYM1
				ATP2C2
				PRMT5
				CDCA7L
				NLN
				DYX1C1
				POLR1C
				POP4
				ARHGEF40
				C7H1orf112
				LOC102156100
				LRPPRC
				POLR1E
				CEP41
				ACAD9
				PARS2
				PDXP
				LOC102151621
				PPAPDC1B
				WDR77
				GTPBP8
				MAK16
				KAT2A
				MTHFD1L
				GPX7
				PPP1R14B
				TRAP1
				CLPB
				TMEM177
				DTD2
				ZNF77
				TRMT61B
				KCNAB2
				MFAP3L
				HSPBP1
				PIEZO1
				XRCC4
				NFIA
				FASTKD2
				SEC24D
				PPIE
				C1QBP
				ST3GAL4
				ABAT
				GALR1
				SPDL1
				LOC610164
				LAS1L
				NARF
				ZNF593
				CDC42BPG
				FAM116A
				TIMM50
				ENOPH1
				ENKD1
				APOM
				TBC1D2
				PTGFRN
				LEPREL4
				MRRF
				FAM135A
				LOC607874
				YARS
				ITGAV
				KIAA1524
				FARSB
				OAT
				GCDH
				APEH
				NUP43
				RPP14
				NME1
				AKR1A1
				TMED4
				IMPDH2
				TTC27
				RSAD1
				PNPO
				L3MBTL2
				TTC30A
				LOC479165
				TUFM
				IPO5
				CWF19L1
				LOC102156116
				NIT2
				MRPL55
				PTPN21
				PAK1
				B9D2
				FXN
				TCF19
				TMEM218
				NOC4L
				APOPT1
				ANKRD10
				MAT2A
				LOC100688029
				IARS2
				ARHGEF39
				ASRGL1
				SSRP1
				HPS3
				C18H11orf83
				WDR74
				FGD4
				FAM108C1
				BOP1
				FAM111A
				LRRC8B
				POLR1B
				CPT2
				EXO1
				CTH
				AKAP1
				PPM1J
				GPD2
				RBM28
				PIGW
				PREP
				TMX3
				LSM11
				CROT
				ABHD12
				PMCH
				LOC477129
				RSL1D1
				PRIM2
				ECHS1
				FASN
				MZT2B
				FTSJ3
				PAQR3
				TAF1B
				PSMG4
				KIAA1715
				AAAS
				C4H5orf54
				NASP
				TBC1D12
				TOMM40
				CDT1
				CPVL
				DDX27
				POLD2
				CFDP1
				METTL16
				RASGRP3
				PSMD1
				TUBB
				TBCE
				ALCAM
				MARS
				DBT
				CCR1
				C14H7orf23
				SH3KBP1
				ZYX
				SNX18
				SAE1
				FLNA
				CLYBL
				GOLIM4
				MCUR1
				MRTO4
				NUTF2
				PINX1
				ELAC2
				PLK4
				TIMM8A
				CKAP2
				PPID
				YWHAG
				MAP4K1
				UXT
				TRAM2
				NPM3
				ATIC
				HJURP
				LOC100684512
				PYCR1
				SACS
				PTPLB
				SLC1A5
				FAM83D
				NAA20
				SLC3A1
				METTL5
				GEMIN5
				ADSL
				MCM7
				SPATA24
				IPO4
				LDHB
				SOX12
				USP45
				CCT5
				KIAA1598
				SLC39A6
				ABCE1
				FES
				NNT
				DAP
				LOC100682542
				IFRD2
				KCNQ1
				LOC100683649
				SNX9
				LPXN
				SPATA5L1
				HEATR3
				PMPCA
				TIFAB
				GEMIN4
				EMG1
				CIRH1A
				NVL
				PLA2G5
				MYO7A
				MAOA
				RFC4
				NOP2
				LOC100683376
				TUBB2A
				RPA2
