# Supplementary material for: Morphologic, phenotypic, and transcriptomic characterization of classically and alternatively activated canine blood-derived macrophages in vitro
Source: PLoS One. 2017 Aug 17;12(8):e0183572. doi: 10.1371/journal.pone.0183572 (PMC5560737; doi:10.1371/journal.pone.0183572)
Supplement: S5 Table — Sheet 1 depicts all genes, which were upregulated in M1- vs. M0-macrophages and simultaneously downregulated in M2- vs M1-macrophages (i.e. canine M1-macrophage genes). Sheet 2 shows all genes, which were upregulated in M2- vs. M0-macrophages and simultaneously upregulated in M2- vs M1-macrophages (i.e. canine M2-macrophage genes). (XLSX) [file pone.0183572.s006.xlsx]

## Sheet: M1 probesets
Probe Set ID	Gene Symbol	Gene Title	FC_M1vsM0	FC_M2vsM1
Cfa.12190.1.A1_at	PTGES	prostaglandin E synthase	3.33508	-1274.66
CfaAffx.30585.1.S1_s_at	PTGES	prostaglandin E synthase	4.9866	-1136.51
CfaAffx.30585.1.S1_at	PTGES	prostaglandin E synthase	4.93738	-517.22
CfaAffx.927.1.S1_at	P2RY14	purinergic receptor P2Y, G-protein coupled, 14	4.80154	-344.217
Cfa.20456.1.S1_at	IFI6	interferon, alpha-inducible protein 6	269.13	-284.483
CfaAffx.15155.1.S1_s_at	PI3	peptidase inhibitor 3, skin-derived	27.2172	-235.521
Cfa.574.1.A1_at	EPHX2	epoxide hydrolase 2, cytoplasmic	119.72	-222.013
Cfa.18083.1.S1_s_at	SLC39A14	solute carrier family 39 (zinc transporter), member 14	15.8944	-212.191
CfaAffx.14855.1.S1_s_at	SLC39A14	solute carrier family 39 (zinc transporter), member 14	13.4811	-200.014
Cfa.3449.1.S1_s_at	PTGS2	prostaglandin-endoperoxide synthase 2 (prostaglandin G/H synthase and cyclooxygenase)	27.7814	-183.484
Cfa.15554.1.A1_at	TNIP3	TNFAIP3 interacting protein 3	3.07369	-178.367
Cfa.9253.1.A1_at	RHOU	ras homolog family member U	446.225	-168.17
Cfa.12477.1.A1_at	LOC102152163	E3 ubiquitin-protein ligase NEURL3-like	86.2004	-156.109
Cfa.16339.1.S1_at	CXCR3	chemokine (C-X-C motif) receptor 3	5.69758	-140.966
Cfa.10779.1.A1_at	IDO2	indoleamine 2,3-dioxygenase 2	28.6513	-127.885
CfaAffx.13394.1.S1_s_at	EPHX2	epoxide hydrolase 2, cytoplasmic	110.242	-122.122
Cfa.15812.1.S1_at	CCL20	chemokine (C-C motif) ligand 20	67.9032	-119.64
Cfa.1856.1.S1_at	TMEM150C	transmembrane protein 150C	40.3633	-103.02
Cfa.2878.1.A1_s_at	CP	ceruloplasmin (ferroxidase)	425.523	-96.0194
CfaAffx.3697.1.S1_at	STEAP4	STEAP family member 4	11.4475	-92.4242
CfaAffx.13209.1.S1_s_at	CP	ceruloplasmin (ferroxidase)	161.878	-90.3029
Cfa.8846.1.A1_s_at	C2 /// CFB	complement component 2 /// complement factor B	4.38996	-78.6653
CfaAffx.7919.1.S1_at	TMEM176A	transmembrane protein 176A	19.5846	-78.1708
CfaAffx.1718.1.S1_at	TNF	tumor necrosis factor	47.1664	-71.3381
Cfa.3528.1.S1_s_at	IL6	interleukin 6 (interferon, beta 2)	252.323	-69.5049
Cfa.20456.1.S1_s_at	IFI6	interferon, alpha-inducible protein 6	68.6393	-68.4616
CfaAffx.17110.1.S1_s_at	MCTP2	multiple C2 domains, transmembrane 2	2.68871	-66.0892
CfaAffx.15348.1.S1_at	SLC22A15	solute carrier family 22, member 15	15.6694	-58.6894
CfaAffx.24565.1.S1_at	FSCN1	fascin homolog 1, actin-bundling protein (Strongylocentrotus purpuratus)	35.827	-58.6388
Cfa.12164.1.A1_at	LOC476045	phospholipase A2, group XVI-like	5.65449	-57.395
Cfa.54.1.S1_s_at	TNF	tumor necrosis factor	47.2029	-55.6338
Cfa.11870.1.A1_at	PI3	peptidase inhibitor 3, skin-derived	17.2465	-52.3329
Cfa.4359.1.S1_at	WNK2	WNK lysine deficient protein kinase 2	52.3474	-52.2968
CfaAffx.1510.1.S1_s_at	IRAK3	interleukin-1 receptor-associated kinase 3	10.7048	-50.3954
CfaAffx.15202.1.S1_s_at	SDC4	syndecan 4	58.6053	-49.5617
CfaAffx.1352.1.S1_s_at	IL22RA2	interleukin 22 receptor, alpha 2	116.004	-48.4839
CfaAffx.26233.1.S1_s_at	CXCR3	chemokine (C-X-C motif) receptor 3	32.5515	-47.2316
CfaAffx.17136.1.S1_s_at	MCTP2	multiple C2 domains, transmembrane 2	6.24594	-46.9446
CfaAffx.24086.1.S1_at	KMO	kynurenine 3-monooxygenase (kynurenine 3-hydroxylase)	23.6635	-46.4832
CfaAffx.15086.1.S1_s_at	BMP1	bone morphogenetic protein 1	43.1432	-43.3066
CfaAffx.261.1.S1_at	HCAR3	hydroxycarboxylic acid receptor 3	13.8821	-42.1951
Cfa.18962.1.S1_s_at	SGK1	serum/glucocorticoid regulated kinase 1	20.1082	-39.1229
Cfa.3719.1.S1_s_at	QPCT	glutaminyl-peptide cyclotransferase	22.7771	-38.9853
Cfa.4926.1.A1_s_at	LOC476045	phospholipase A2, group XVI-like	5.40645	-37.1414
CfaAffx.6260.1.S1_at	C18H7orf10	chromosome 18 open reading frame, human C7orf10	43.1941	-36.1277
Cfa.6458.1.A1_s_at	C2 /// CFB	complement component 2 /// complement factor B	5.04697	-36.0136
Cfa.8282.1.A1_s_at	KBTBD7	kelch repeat and BTB (POZ) domain containing 7	3.64475	-35.3779
CfaAffx.8143.1.S1_at	KBTBD7	kelch repeat and BTB (POZ) domain containing 7	2.59128	-35.1441
Cfa.21252.1.S1_s_at	ENPP2	ectonucleotide pyrophosphatase/phosphodiesterase 2	188.74	-34.8518
CfaAffx.16422.1.S1_s_at	CCL20	chemokine (C-C motif) ligand 20	33.4298	-34.8285
CfaAffx.12562.1.S1_s_at	SERPING1	serpin peptidase inhibitor, clade G (C1 inhibitor), member 1	8.8039	-33.5909
CfaAffx.12220.1.S1_at	FAIM	Fas apoptotic inhibitory molecule	4.55343	-33.5715
CfaAffx.26205.1.S1_s_at	NUPR1	nuclear protein, transcriptional regulator, 1	80.1583	-32.0746
CfaAffx.12561.1.S1_s_at	SERPING1	serpin peptidase inhibitor, clade G (C1 inhibitor), member 1	7.11505	-32.0703
Cfa.10821.1.A1_s_at	C1S	complement component 1, s subcomponent	12.9276	-31.3153
CfaAffx.3699.1.S1_s_at	STEAP4	STEAP family member 4	8.28164	-31.1513
Cfa.3554.1.S1_at	IL1B	interleukin 1, beta	22.1795	-29.8808
CfaAffx.3288.1.S1_at	LOC608975	trem-like transcript 2 protein-like	3.30514	-29.8252
CfaAffx.11741.1.S1_s_at	IL1B	interleukin 1, beta	21.2843	-29.6297
Cfa.8904.1.A1_at	SLC22A15	solute carrier family 22, member 15	11.6886	-29.4428
CfaAffx.3467.1.S1_at	MOB3B	MOB kinase activator 3B	29.2057	-29.1897
CfaAffx.12817.1.S1_s_at	MCTP1	multiple C2 domains, transmembrane 1	16.2516	-28.9629
Cfa.14378.1.S1_at	DGAT2	diacylglycerol O-acyltransferase 2	4.39986	-27.9684
CfaAffx.11413.1.S1_at	FFAR2	free fatty acid receptor 2	11.5073	-26.3721
CfaAffx.17699.1.S1_at	VWA5A	von Willebrand factor A domain containing 5A	10.2443	-26.2487
CfaAffx.6423.1.S1_at	LOC100855519	kell blood group glycoprotein-like	22.581	-24.7187
CfaAffx.15487.1.S1_s_at	CD83	CD83 molecule	2.47212	-24.6374
CfaAffx.17476.1.S1_at	GALNT3	UDP-N-acetyl-alpha-D-galactosamine:polypeptide N-acetylgalactosaminyltransferase 3 (GalNAc-T3)	23.0654	-24.5164
Cfa.3117.2.A1_at	SERPING1	serpin peptidase inhibitor, clade G (C1 inhibitor), member 1	6.61927	-23.968
CfaAffx.6252.1.S1_s_at	INHBA	inhibin, beta A	27.7978	-23.7644
CfaAffx.15144.1.S1_s_at	NFKBIZ	nuclear factor of kappa light polypeptide gene enhancer in B-cells inhibitor, zeta	2.284	-23.7615
CfaAffx.956.1.S1_at	LOC608687	placenta-specific gene 8 protein-like	16.3962	-23.1796
CfaAffx.6716.1.S1_s_at	MGAM	maltase-glucoamylase (alpha-glucosidase)	22.3296	-21.9509
CfaAffx.6283.1.S1_at	FBXW2 /// MEGF9	F-box and WD repeat domain containing 2 /// multiple EGF-like-domains 9	2.16492	-21.841
Cfa.19640.1.S1_s_at	DENND5A	DENN/MADD domain containing 5A	5.10646	-21.5729
Cfa.4090.1.A1_s_at	MGLL	monoglyceride lipase	12.0686	-20.3859
Cfa.845.1.A1_s_at	HOOK1	hook microtubule-tethering protein 1	23.0629	-20.3426
Cfa.15086.1.A1_at	MOB3B	MOB kinase activator 3B	28.4785	-20.2899
Cfa.15819.1.S1_s_at	P2RX2	purinergic receptor P2X, ligand-gated ion channel, 2	4.87211	-20.2329
Cfa.4760.1.A1_at	FAM110A	family with sequence similarity 110, member A	6.3541	-19.1055
CfaAffx.21064.1.S1_at	DUSP10	dual specificity phosphatase 10	12.9775	-19.0369
CfaAffx.2218.1.S1_s_at	ENPP2	ectonucleotide pyrophosphatase/phosphodiesterase 2	117.425	-18.7675
CfaAffx.4239.1.S1_s_at	GSTA3	glutathione S-transferase alpha 3	6.307	-17.7154
CfaAffx.6258.1.S1_at	C18H7orf10	chromosome 18 open reading frame, human C7orf10	22.3089	-17.7125
CfaAffx.6714.1.S1_at	MGAM	maltase-glucoamylase (alpha-glucosidase)	18.3655	-17.4891
CfaAffx.1156.1.S1_at	IL23A	interleukin 23, alpha subunit p19	11.7317	-17.1548
CfaAffx.10213.1.S1_at	QPCT	glutaminyl-peptide cyclotransferase	6.60625	-16.985
Cfa.18317.1.S1_s_at	MCOLN2 /// MCOLN3	mucolipin 2 /// mucolipin 3	4.51015	-16.8217
Cfa.20725.1.S1_s_at	NCF1	neutrophil cytosolic factor 1	4.94935	-16.4328
Cfa.15448.1.A1_at	BMP1	bone morphogenetic protein 1	27.1168	-15.9639
CfaAffx.14728.1.S1_s_at	ARHGAP24	Rho GTPase activating protein 24	5.00863	-15.9092
Cfa.14036.1.A1_s_at	KMO	kynurenine 3-monooxygenase (kynurenine 3-hydroxylase)	7.02719	-15.6957
CfaAffx.6741.1.S1_at	CLEC5A	C-type lectin domain family 5, member A	18.5293	-15.6391
CfaAffx.31083.1.S1_at	MCOLN2 /// MCOLN3	mucolipin 2 /// mucolipin 3	3.21943	-15.4441
CfaAffx.7101.1.S1_s_at	KDM4D /// LOC485120	lysine (K)-specific demethylase 4D /// lysine-specific demethylase 4D-like	16.1165	-15.2072
CfaAffx.8977.1.S1_s_at	DGAT2	diacylglycerol O-acyltransferase 2	14.6897	-15.0919
CfaAffx.17716.1.S1_s_at	VWA5A	von Willebrand factor A domain containing 5A	4.83861	-14.9673
Cfa.19253.1.S1_at	GLT1D1	glycosyltransferase 1 domain containing 1	9.45307	-14.8467
Cfa.15214.1.A1_at	APBB2	amyloid beta (A4) precursor protein-binding, family B, member 2	14.6399	-14.7739
Cfa.4626.1.A1_at	IL15RA	interleukin 15 receptor, alpha	3.33639	-14.5816
CfaAffx.20524.1.S1_s_at	NRP2	neuropilin 2	30.2562	-14.2306
CfaAffx.4163.1.S1_at	IL17F	interleukin 17F	13.5746	-14.2024
CfaAffx.2351.1.S1_at	HAS2	hyaluronan synthase 2	14.4285	-14.088
CfaAffx.8891.1.S1_at	AFMID	arylformamidase	14.0706	-14.0401
Cfa.21446.1.S1_at	SDC4	syndecan 4	14.0873	-14.0255
Cfa.11630.2.A1_s_at	CNN3	calponin 3, acidic	11.0433	-13.8437
CfaAffx.2498.1.S1_s_at	CXCL14	chemokine (C-X-C motif) ligand 14	27.2889	-13.815
CfaAffx.20286.1.S1_s_at	GLUL	glutamate-ammonia ligase	4.48376	-13.6497
CfaAffx.19514.1.S1_s_at	SLAMF1	signaling lymphocytic activation molecule family member 1	16.002	-13.3723
CfaAffx.10729.1.S1_at	GPR84	G protein-coupled receptor 84	9.95665	-13.3243
CfaAffx.27363.1.S1_at	DCUN1D3	DCN1, defective in cullin neddylation 1, domain containing 3	12.3835	-12.8678
CfaAffx.23253.1.S1_at	BIRC3	baculoviral IAP repeat containing 3	3.72411	-12.8614
CfaAffx.4282.1.S1_at	NINJ1	ninjurin 1	4.42267	-12.4812
Cfa.12407.1.A1_at	PPP1R26	protein phosphatase 1, regulatory subunit 26	5.59674	-12.4673
CfaAffx.29124.1.S1_at	NXN	nucleoredoxin	64.7764	-12.2998
CfaAffx.12394.1.S1_s_at	ACSL1	acyl-CoA synthetase long-chain family member 1	2.36606	-12.0799
CfaAffx.14166.1.S1_at	TMEM150C	transmembrane protein 150C	12.0793	-12.0793
Cfa.1493.1.A1_at	FHL2	four and a half LIM domains 2	8.85941	-11.9835
CfaAffx.23737.1.S1_s_at	DMXL2	Dmx-like 2	17.2507	-11.9097
CfaAffx.20523.1.S1_s_at	ID3	inhibitor of DNA binding 3, dominant negative helix-loop-helix protein	2.80061	-11.7563
Cfa.13283.1.A1_at	LOC481634	acyl-coenzyme A amino acid N-acyltransferase 2-like	15.6539	-11.6718
Cfa.12168.1.A1_s_at	FAM3B	family with sequence similarity 3, member B	11.7502	-11.5655
CfaAffx.6745.1.S1_s_at	CLEC5A	C-type lectin domain family 5, member A	11.9531	-11.4222
CfaAffx.16226.1.S1_at	MS4A7	membrane-spanning 4-domains, subfamily A, member 7	4.1789	-11.0963
CfaAffx.1787.1.S1_s_at	ZNF608	zinc finger protein 608	14.7826	-11.0611
CfaAffx.30509.1.S1_at	KIAA0513	KIAA0513 ortholog	8.52601	-11.0109
Cfa.13544.1.A1_at	TSPAN9	tetraspanin 9	12.1759	-10.8741
Cfa.14036.1.A1_at	KMO	kynurenine 3-monooxygenase (kynurenine 3-hydroxylase)	5.27287	-10.7826
CfaAffx.25794.1.S1_s_at	STK10	serine/threonine kinase 10	2.25534	-10.5955
CfaAffx.17176.1.S1_s_at	CD80	CD80 molecule	3.11307	-10.5531
CfaAffx.7159.1.S1_at	TNIP3	TNFAIP3 interacting protein 3	8.44953	-10.509
CfaAffx.12819.1.S1_s_at	MCTP1	multiple C2 domains, transmembrane 1	6.99747	-10.2849
CfaAffx.13864.1.S1_at	CCL22	chemokine (C-C motif) ligand 22	187.956	-10.2122
CfaAffx.349.1.S1_at	FAM110A	family with sequence similarity 110, member A	9.39661	-10.1177
CfaAffx.11365.1.S1_s_at	PLK2	polo-like kinase 2	4.90051	-10.0577
CfaAffx.6058.1.S1_s_at	ST7	suppression of tumorigenicity 7	5.58522	-10.0011
CfaAffx.14658.1.S1_s_at	SERPINB9	serpin peptidase inhibitor, clade B (ovalbumin), member 9	4.35105	-9.96711
CfaAffx.8916.1.S1_at	PGS1	phosphatidylglycerophosphate synthase 1	8.40808	-9.71743
Cfa.3173.1.A1_s_at	LOC476879 /// SAA1	serum amyloid A protein-like /// serum amyloid A1	3.79661	-9.65146
Cfa.21149.1.S1_at	CXCL14	chemokine (C-X-C motif) ligand 14	108.547	-9.62536
CfaAffx.29182.1.S1_at	EBI3	Epstein-Barr virus induced 3	22.6848	-9.62088
Cfa.1434.1.A1_at	APBB2	amyloid beta (A4) precursor protein-binding, family B, member 2	10.8396	-9.50607
CfaAffx.19313.1.S1_s_at	ATP1A4	ATPase, Na+/K+ transporting, alpha 4 polypeptide	9.46783	-9.46783
CfaAffx.5812.1.S1_at	AOAH	acyloxyacyl hydrolase (neutrophil)	2.54285	-9.4211
CfaAffx.29124.1.S1_s_at	NXN	nucleoredoxin	34.0735	-9.36027
CfaAffx.24597.1.S1_at	CCR7	chemokine (C-C motif) receptor 7	5.64061	-9.33903
CfaAffx.15671.1.S1_s_at	ETS2	v-ets avian erythroblastosis virus E26 oncogene homolog 2	36.4632	-9.32692
Cfa.3619.1.S1_at	CD38	CD38 molecule	5.01991	-9.25901
CfaAffx.847.1.S1_at	CLEC4D	C-type lectin domain family 4, member D	5.59301	-9.23753
Cfa.3645.1.S1_s_at	IL1A	interleukin 1, alpha	10.2071	-9.23109
Cfa.14746.1.A1_at	PRR5L	proline rich 5 like	2.95995	-9.1957
CfaAffx.4743.1.S1_s_at	LOC481634	acyl-coenzyme A amino acid N-acyltransferase 2-like	9.31355	-9.14806
Cfa.21216.1.S1_s_at	ST3GAL5	ST3 beta-galactoside alpha-2,3-sialyltransferase 5	4.84019	-9.14713
CfaAffx.619.1.S1_s_at	LOC100855949 /// LOC100856168 /// LOC491435 /// LOC607362	olfactory receptor 9A4-like /// olfactory receptor 9A4-like /// olfactory receptor 9A4-like /// olfactory receptor 9A4-like	9.10226	-9.07757
Cfa.3583.1.S1_s_at	KCNJ2	potassium inwardly-rectifying channel, subfamily J, member 2	9.05042	-9.04595
CfaAffx.5632.1.S1_at	WDPCP	WD repeat containing planar cell polarity effector	9.02128	-9.01019
CfaAffx.27815.1.S1_s_at	TTC39C	tetratricopeptide repeat domain 39C	4.04692	-8.98629
Cfa.498.1.A1_s_at	PARD3B	par-3 family cell polarity regulator beta	8.72433	-8.78446
Cfa.9526.1.A1_s_at	FAM49A	family with sequence similarity 49, member A	3.06467	-8.7474
Cfa.15969.1.S1_at	HS6ST1	heparan sulfate 6-O-sulfotransferase 1	27.1909	-8.72268
CfaAffx.30854.1.S1_at	FAM69A	family with sequence similarity 69, member A	2.46401	-8.58657
CfaAffx.13349.1.S1_at	ZBTB10	zinc finger and BTB domain containing 10	4.5475	-8.57133
Cfa.1645.1.S1_at	MYH11	myosin, heavy chain 11, smooth muscle	2.07808	-8.53307
Cfa.3378.1.S1_at	NUPR1	nuclear protein, transcriptional regulator, 1	11.6703	-8.51826
Cfa.7583.1.A1_at	IKZF4	IKAROS family zinc finger 4 (Eos)	5.20321	-8.48044
CfaAffx.15613.1.S1_s_at	LRRK2	leucine-rich repeat kinase 2	5.87099	-8.4771
CfaAffx.13623.1.S1_at	STBD1	starch binding domain 1	4.67256	-8.44621
CfaAffx.26206.1.S1_at	IL27	interleukin 27	5.17327	-8.4369
CfaAffx.5042.1.S1_s_at	MALSU1	mitochondrial assembly of ribosomal large subunit 1	2.26112	-8.43655
CfaAffx.21504.1.S1_s_at	CLEC4E	C-type lectin domain family 4, member E	2.08316	-8.41964
CfaAffx.8028.1.S1_s_at	PLAUR	plasminogen activator, urokinase receptor	3.68912	-8.28197
CfaAffx.6869.1.S1_at	TRAF3IP2	TRAF3 interacting protein 2	12.9376	-8.16821
CfaAffx.9444.1.S1_at	XDH	xanthine dehydrogenase	5.80224	-8.10967
Cfa.2388.2.A1_s_at	BCO2	beta-carotene oxygenase 2	9.99463	-8.07809
Cfa.12898.1.A1_at	PPP1R3B	protein phosphatase 1, regulatory subunit 3B	2.67241	-7.98481
Cfa.15768.1.A1_at	LOC100687377	uncharacterized LOC100687377	7.52025	-7.97149
CfaAffx.18949.1.S1_at	BAG3	BCL2-associated athanogene 3	9.35705	-7.95789
CfaAffx.28073.1.S1_s_at	ADRB2	adrenoceptor beta 2, surface	2.89554	-7.92853
CfaAffx.14358.1.S1_at	LXN	latexin	4.67793	-7.8817
CfaAffx.11923.1.S1_s_at	LOC475755 /// RPIA	ribose-5-phosphate isomerase-like /// ribose 5-phosphate isomerase A	13.9956	-7.8675
Cfa.19066.1.S1_at	NXN	nucleoredoxin	35.8204	-7.80807
Cfa.2388.2.A1_at	BCO2	beta-carotene oxygenase 2	11.3847	-7.80249
CfaAffx.18316.1.S1_at	SLAMF8	SLAM family member 8	6.07578	-7.74673
CfaAffx.8768.1.S1_at	IL15RA	interleukin 15 receptor, alpha	3.82316	-7.66753
CfaAffx.20222.1.S1_s_at	LIMK2	LIM domain kinase 2	2.17073	-7.64438
Cfa.3818.1.S1_s_at	ADORA2A	adenosine A2a receptor	2.77955	-7.49792
CfaAffx.24400.1.S1_at	RHOH	ras homolog family member H	2.5424	-7.45638
CfaAffx.4073.1.S1_s_at	FHL2	four and a half LIM domains 2	7.34701	-7.43839
CfaAffx.11711.1.S1_s_at	DENND5A	DENN/MADD domain containing 5A	2.25209	-7.32634
CfaAffx.21637.1.S1_at	BATF2	basic leucine zipper transcription factor, ATF-like 2	2.2035	-7.27857
CfaAffx.1318.1.S1_s_at	AHI1	Abelson helper integration site 1	23.4397	-7.25178
CfaAffx.9452.1.S1_s_at	XDH	xanthine dehydrogenase	4.74475	-7.17773
Cfa.12514.1.A1_at	BAG3	BCL2-associated athanogene 3	16.4381	-7.13134
CfaAffx.22466.1.S1_at	NIN	ninein (GSK3B interacting protein)	3.0384	-7.13051
Cfa.3983.1.A1_at	IGSF10	immunoglobulin superfamily, member 10	4.0118	-7.10888
CfaAffx.12819.1.S1_at	MCTP1	multiple C2 domains, transmembrane 1	4.61532	-7.1063
Cfa.6390.1.A1_at	SLC39A14	solute carrier family 39 (zinc transporter), member 14	2.94838	-7.05744
Cfa.15118.1.S1_at	F11	coagulation factor XI	15.2238	-7.04859
Cfa.20111.1.S1_s_at	NSUN7	NOP2/Sun domain family, member 7	9.84731	-7.03836
CfaAffx.12099.1.S1_at	RILPL2	Rab interacting lysosomal protein-like 2	2.63174	-6.89424
CfaAffx.11638.1.S1_at	PLAGL2	pleiomorphic adenoma gene-like 2	2.2407	-6.87292
Cfa.15365.1.A1_at	ST3GAL5	ST3 beta-galactoside alpha-2,3-sialyltransferase 5	3.80175	-6.81231
CfaAffx.17185.1.S1_s_at	ADPRH	ADP-ribosylarginine hydrolase	3.36827	-6.73846
CfaAffx.13368.1.S1_s_at	PAG1	phosphoprotein associated with glycosphingolipid microdomains 1	3.02142	-6.6971
CfaAffx.9145.1.S1_at	KYNU	kynureninase	7.5556	-6.66382
CfaAffx.11278.1.S1_s_at	SRXN1	sulfiredoxin 1	5.83506	-6.60643
CfaAffx.13746.1.S1_at	RHEBL1	Ras homolog enriched in brain like 1	5.68982	-6.57415
CfaAffx.1855.1.S1_s_at	ZDHHC14	zinc finger, DHHC-type containing 14	14.2053	-6.50842
CfaAffx.5404.1.S1_at	REL	v-rel avian reticuloendotheliosis viral oncogene homolog	2.05302	-6.50495
CfaAffx.17748.1.S1_at	NCF1	neutrophil cytosolic factor 1	4.36231	-6.50429
CfaAffx.15606.1.S1_at	LRRK2	leucine-rich repeat kinase 2	3.81963	-6.46419
Cfa.14185.1.A1_at	SLC43A2	solute carrier family 43 (amino acid system L transporter), member 2	11.4682	-6.39577
Cfa.18345.1.S1_at	NAMPT	nicotinamide phosphoribosyltransferase	2.12583	-6.3816
Cfa.5195.1.A1_s_at	LXN	latexin	4.02255	-6.32576
CfaAffx.11383.1.S1_s_at	RASSF4	Ras association (RalGDS/AF-6) domain family member 4	2.04267	-6.29873
CfaAffx.16068.1.S1_at	CHI3L1	chitinase 3-like 1 (cartilage glycoprotein-39)	207.658	-6.29809
Cfa.15098.1.A1_at	SPIN2B	spindlin family, member 2B	2.70116	-6.28875
CfaAffx.24173.1.S1_s_at	TTC25	tetratricopeptide repeat domain 25	7.88942	-6.24446
CfaAffx.1323.1.S1_at	PDE7B	phosphodiesterase 7B	4.48051	-6.19126
CfaAffx.5084.1.S1_at	ZNF462	zinc finger protein 462	32.475	-6.1344
CfaAffx.29293.1.S1_s_at	SLC43A2	solute carrier family 43 (amino acid system L transporter), member 2	4.19331	-6.07162
Cfa.14007.1.A1_x_at	LXN	latexin	3.71757	-6.05628
Cfa.18314.1.S1_s_at	GOLGA2	golgin A2	8.61373	-6.03435
Cfa.14035.1.A1_at	NSUN7	NOP2/Sun domain family, member 7	66.0007	-6.02129
CfaAffx.15369.1.S1_s_at	CBLB	Cbl proto-oncogene B, E3 ubiquitin protein ligase	4.86325	-6.01726
CfaAffx.21558.1.S1_s_at	BCO2	beta-carotene oxygenase 2	6.23946	-6.01235
CfaAffx.20545.1.S1_s_at	SIK3	SIK family kinase 3	2.38762	-5.99323
CfaAffx.25722.1.S1_at	SH3PXD2B	SH3 and PX domains 2B	7.70332	-5.98277
Cfa.21032.1.S1_s_at	TNIP1	TNFAIP3 interacting protein 1	2.38677	-5.951
Cfa.20087.1.S1_s_at	GALNT3	UDP-N-acetyl-alpha-D-galactosamine:polypeptide N-acetylgalactosaminyltransferase 3 (GalNAc-T3)	5.93516	-5.94044
CfaAffx.14611.1.S1_s_at	TBC1D23	TBC1 domain family, member 23	2.95163	-5.92313
CfaAffx.4552.1.S1_at	AHR	aryl hydrocarbon receptor	3.25645	-5.92297
CfaAffx.29360.1.S1_at	SLC6A8	solute carrier family 6 (neurotransmitter transporter), member 8	4.38026	-5.90928
Cfa.2593.1.S1_at	PLAUR	plasminogen activator, urokinase receptor	2.70034	-5.86824
CfaAffx.15208.1.S1_at	LOC488214	N-acetyllactosaminide beta-1,6-N-acetylglucosaminyl-transferase, isoform A-like	3.0083	-5.83167
CfaAffx.21651.1.S1_s_at	IL1RAP	interleukin 1 receptor accessory protein	5.54596	-5.81303
Cfa.4116.1.A1_at	TMEM132A	transmembrane protein 132A	6.16321	-5.79792
CfaAffx.21651.1.S1_at	IL1RAP	interleukin 1 receptor accessory protein	6.06759	-5.78131
Cfa.12352.1.A1_at	MAFF	v-maf avian musculoaponeurotic fibrosarcoma oncogene homolog F	4.03268	-5.74279
CfaAffx.1289.1.S1_at	SGK1	serum/glucocorticoid regulated kinase 1	4.28818	-5.71082
Cfa.307.4.S1_s_at	CRYAB	crystallin, alpha B	14.5437	-5.63672
CfaAffx.7828.1.S1_at	TMEM176B	transmembrane protein 176B	5.57353	-5.60013
CfaAffx.19551.1.S1_s_at	SLAMF7	SLAM family member 7	4.42371	-5.59759
CfaAffx.24171.1.S1_at	TTC25	tetratricopeptide repeat domain 25	9.75738	-5.59291
CfaAffx.30758.1.S1_at	ZNRF1	zinc and ring finger 1, E3 ubiquitin protein ligase	2.4438	-5.57119
Cfa.5195.1.A1_at	LXN	latexin	3.3277	-5.45834
CfaAffx.7389.1.S1_at	GSAP	gamma-secretase activating protein	4.72656	-5.44986
Cfa.3581.1.S1_s_at	VEGFA	vascular endothelial growth factor A	7.65039	-5.42444
CfaAffx.25778.1.S1_at	SEMA4A	sema domain, immunoglobulin domain (Ig), transmembrane domain (TM) and short cytoplasmic domain, (semaphorin) 4A	2.17495	-5.36868
CfaAffx.11700.1.S1_s_at	YTHDF3	YTH domain family, member 3	5.58215	-5.36146
Cfa.3983.1.A1_s_at	IGSF10	immunoglobulin superfamily, member 10	5.18509	-5.35294
Cfa.12054.1.A1_s_at	AHCYL2	adenosylhomocysteinase-like 2	3.73334	-5.32562
Cfa.5284.1.A1_at	PAG1	phosphoprotein associated with glycosphingolipid microdomains 1	2.45067	-5.28992
CfaAffx.13934.1.S1_at	RND1	Rho family GTPase 1	5.02555	-5.17898
Cfa.12671.1.A1_at	SLAMF7	SLAM family member 7	4.11191	-5.17881
CfaAffx.18894.1.S1_at	LPGAT1	lysophosphatidylglycerol acyltransferase 1	2.80473	-5.17281
Cfa.17714.1.S1_s_at	PGS1	phosphatidylglycerophosphate synthase 1	3.41187	-5.17251
CfaAffx.1930.1.S1_s_at	SOD2	superoxide dismutase 2, mitochondrial	6.16273	-5.12957
CfaAffx.1341.1.S1_at	MAP3K5	mitogen-activated protein kinase kinase kinase 5	6.38564	-5.11056
CfaAffx.12693.1.S1_at	SLC11A2	solute carrier family 11 (proton-coupled divalent metal ion transporter), member 2	2.89493	-5.09297
CfaAffx.5276.1.S1_s_at	SNX10	sorting nexin 10	5.22713	-5.08194
Cfa.1254.1.S1_s_at	CLU	clusterin	66.2343	-5.06829
CfaAffx.10095.1.S1_at	RAB20	RAB20, member RAS oncogene family	4.94181	-4.98965
CfaAffx.6485.1.S1_s_at	PRDM1	PR domain containing 1, with ZNF domain	2.96862	-4.98143
Cfa.15192.1.A1_s_at	CREB5	cAMP responsive element binding protein 5	16.1197	-4.96172
Cfa.17084.1.S1_at	SNX10	sorting nexin 10	6.50527	-4.95581
Cfa.12456.1.A1_at	LOC612059	SLAM family member 6-like	16.3604	-4.93695
Cfa.14934.1.A1_at	ARHGAP24	Rho GTPase activating protein 24	2.05901	-4.9288
CfaAffx.17929.1.S1_at	PTPN1	protein tyrosine phosphatase, non-receptor type 1	2.18086	-4.92428
CfaAffx.12051.1.S1_s_at	NCK1	NCK adaptor protein 1	2.18009	-4.91005
CfaAffx.7390.1.S1_s_at	GSAP	gamma-secretase activating protein	4.10419	-4.90393
CfaAffx.19832.1.S1_at	TMEM57	transmembrane protein 57	2.13998	-4.88941
Cfa.4658.1.A1_at	PKIG	protein kinase (cAMP-dependent, catalytic) inhibitor gamma	4.89884	-4.88344
CfaAffx.11152.1.S1_at	RAD21L1	RAD21-like 1 (S. pombe)	4.09834	-4.88073
CfaAffx.26230.1.S1_at	VASH1	vasohibin 1	5.63058	-4.84318
Cfa.20935.1.S1_at	ITM2C	integral membrane protein 2C	4.52935	-4.84267
CfaAffx.7181.1.S1_at	PANX1	pannexin 1	3.94251	-4.80636
CfaAffx.1316.1.S1_s_at	AHI1	Abelson helper integration site 1	12.4706	-4.79547
Cfa.19727.1.S1_s_at	GSAP	gamma-secretase activating protein	3.26449	-4.79465
Cfa.15773.1.A1_at	VASH1	vasohibin 1	22.8135	-4.78011
CfaAffx.23379.1.S1_s_at	CRKL	v-crk avian sarcoma virus CT10 oncogene homolog-like	3.0899	-4.76755
CfaAffx.18355.1.S1_s_at	PHACTR4	phosphatase and actin regulator 4	4.15557	-4.72557
Cfa.20839.1.S1_s_at	TBC1D23	TBC1 domain family, member 23	2.78563	-4.72471
CfaAffx.28439.1.S1_at	AK4	adenylate kinase 4	4.31514	-4.72406
CfaAffx.24719.1.S1_s_at	CECR1	cat eye syndrome chromosome region, candidate 1	9.17512	-4.65663
Cfa.21061.1.S1_at	MFGE8	milk fat globule-EGF factor 8 protein	4.64834	-4.64834
Cfa.7827.1.A1_at	MGLL	monoglyceride lipase	5.36601	-4.63744
CfaAffx.19089.1.S1_at	ZDHHC18	zinc finger, DHHC-type containing 18	4.35745	-4.61114
CfaAffx.2552.1.S1_at	L3MBTL3	l(3)mbt-like 3 (Drosophila)	2.50908	-4.5864
Cfa.3619.1.S1_s_at	CD38	CD38 molecule	2.72724	-4.52986
Cfa.6227.1.A1_at	SOAT2	sterol O-acyltransferase 2	4.47145	-4.51176
CfaAffx.21308.1.S1_s_at	PLA2G4A	phospholipase A2, group IVA (cytosolic, calcium-dependent)	3.92956	-4.49899
CfaAffx.22637.1.S1_at	SUCO	SUN domain containing ossification factor	2.29137	-4.49875
Cfa.4008.1.A1_at	LARGE	like-glycosyltransferase	9.56933	-4.47419
Cfa.7131.1.A1_at	NXN	nucleoredoxin	20.9957	-4.45841
Cfa.18688.1.S1_s_at	NPEPPS	aminopeptidase puromycin sensitive	2.1782	-4.45011
Cfa.19766.1.A1_at	AKAP2	A kinase (PRKA) anchor protein 2	5.36563	-4.44406
CfaAffx.18082.1.S1_s_at	SOX5	SRY (sex determining region Y)-box 5	4.72442	-4.43885
Cfa.13204.1.A1_at	EMR1	egf-like module containing, mucin-like, hormone receptor-like 1	5.76147	-4.43396
CfaAffx.11156.1.S1_at	RAD21L1	RAD21-like 1 (S. pombe)	3.73614	-4.38554
CfaAffx.11893.1.S1_s_at	F11	coagulation factor XI	8.89681	-4.37997
CfaAffx.15371.1.S1_s_at	CBLB	Cbl proto-oncogene B, E3 ubiquitin protein ligase	4.02254	-4.36165
Cfa.12526.1.A1_at	SLC43A2	solute carrier family 43 (amino acid system L transporter), member 2	5.87171	-4.35656
CfaAffx.5133.1.S1_at	FPR2	formyl peptide receptor 2	2.75339	-4.34033
CfaAffx.19553.1.S1_at	SLAMF7	SLAM family member 7	3.2781	-4.34004
Cfa.1303.1.A1_at	ST7	suppression of tumorigenicity 7	2.91645	-4.32729
CfaAffx.25065.1.S1_s_at	PDPN	podoplanin	11.4642	-4.30605
Cfa.14600.1.A1_at	NXN	nucleoredoxin	23.2459	-4.25414
CfaAffx.25065.1.S1_at	PDPN	podoplanin	9.82813	-4.25008
CfaAffx.20351.1.S1_at	NUBPL	nucleotide binding protein-like	12.8807	-4.21767
Cfa.11291.1.A1_at	C14H7orf41	chromosome 14 open reading frame, human C7orf41	2.48351	-4.211
Cfa.70.1.A1_s_at	SULT1A1	sulfotransferase family, cytosolic, 1A, phenol-preferring, member 1	8.05711	-4.18788
Cfa.18538.1.S1_s_at	SCCPDH	saccharopine dehydrogenase (putative)	4.38598	-4.18748
Cfa.306.1.S1_at	AKAP2	A kinase (PRKA) anchor protein 2	5.60223	-4.17785
Cfa.13482.1.A1_at	SFT2D2	SFT2 domain containing 2	3.16813	-4.15431
CfaAffx.29360.1.S1_s_at	SLC6A8	solute carrier family 6 (neurotransmitter transporter), member 8	2.95639	-4.1538
CfaAffx.22082.1.S1_s_at	ZC3H12C	zinc finger CCCH-type containing 12C	2.92195	-4.13028
CfaAffx.7375.1.S1_at	GSAP	gamma-secretase activating protein	2.83595	-4.12513
CfaAffx.24880.1.S1_s_at	TBC1D1	TBC1 (tre-2/USP6, BUB2, cdc16) domain family, member 1	2.6213	-4.09885
CfaAffx.23526.1.S1_s_at	SFT2D2	SFT2 domain containing 2	2.65622	-4.09075
CfaAffx.29291.1.S1_at	SLC43A2	solute carrier family 43 (amino acid system L transporter), member 2	2.50704	-4.06597
Cfa.335.2.S1_at	LOC475755 /// RPIA	ribose-5-phosphate isomerase-like /// ribose 5-phosphate isomerase A	5.24106	-4.04807
Cfa.11707.1.A1_at	RAB11FIP4	RAB11 family interacting protein 4 (class II)	2.25656	-4.02916
CfaAffx.5757.1.S1_at	SLC31A1	solute carrier family 31 (copper transporter), member 1	11.6356	-3.97216
Cfa.21184.1.S1_at	CD82	CD82 molecule	2.85852	-3.97164
Cfa.3512.1.S1_s_at	SGK1	serum/glucocorticoid regulated kinase 1	2.72073	-3.96503
Cfa.21225.1.S1_s_at	MAP2K2	mitogen-activated protein kinase kinase 2	2.51703	-3.92944
Cfa.10575.1.A1_at	ST3GAL5	ST3 beta-galactoside alpha-2,3-sialyltransferase 5	2.79082	-3.88893
CfaAffx.15897.1.S1_at	NFKB2	nuclear factor of kappa light polypeptide gene enhancer in B-cells 2 (p49/p100)	2.01961	-3.87885
CfaAffx.10943.1.S1_at	PPP1R3B	protein phosphatase 1, regulatory subunit 3B	3.25636	-3.84817
Cfa.19457.1.S1_s_at	RNF19B	ring finger protein 19B	2.08614	-3.81634
Cfa.9940.1.S1_at	AK4	adenylate kinase 4	3.0986	-3.79892
CfaAffx.25028.1.S1_at	TMEM51	transmembrane protein 51	3.16571	-3.7908
CfaAffx.19781.1.S1_at	REPS2	RALBP1 associated Eps domain containing 2	4.31636	-3.78084
CfaAffx.26833.1.S1_s_at	S100A2	S100 calcium binding protein A2	5.43295	-3.77204
Cfa.12167.1.A1_at	XDH	xanthine dehydrogenase	2.49579	-3.72093
Cfa.5453.1.A1_at	ZDHHC18	zinc finger, DHHC-type containing 18	2.03008	-3.71354
Cfa.11257.1.A1_at	KIAA0513	KIAA0513 ortholog	2.12455	-3.68925
CfaAffx.13921.1.S1_at	42064	membrane-associated ring finger (C3HC4) 1, E3 ubiquitin protein ligase	3.26784	-3.66843
Cfa.11802.1.A1_at	LOC100685493	uncharacterized LOC100685493	4.4255	-3.65612
CfaAffx.3947.1.S1_s_at	LIMS1	LIM and senescent cell antigen-like domains 1	11.35	-3.64997
CfaAffx.5152.1.S1_at	DFNA5	deafness, autosomal dominant 5	2.35693	-3.64769
Cfa.11197.1.A1_s_at	SCG3	secretogranin III	2.55107	-3.64212
Cfa.127.1.S1_s_at	PLAU	plasminogen activator, urokinase	4.88844	-3.63872
CfaAffx.6410.1.S1_s_at	STARD3NL	STARD3 N-terminal like	4.2388	-3.62802
CfaAffx.14182.1.S1_s_at	EXOC6B	exocyst complex component 6B	2.95222	-3.6257
Cfa.4579.2.S1_at	TBC1D1	TBC1 (tre-2/USP6, BUB2, cdc16) domain family, member 1	2.63845	-3.60849
Cfa.19956.1.S1_s_at	EVI5	ecotropic viral integration site 5	5.5617	-3.60254
Cfa.14238.1.A1_s_at	MAP3K5	mitogen-activated protein kinase kinase kinase 5	3.50722	-3.60033
CfaAffx.21358.1.S1_s_at	OSBPL6	oxysterol binding protein-like 6	2.15339	-3.59099
Cfa.9150.1.A1_at	SIPA1L2	signal-induced proliferation-associated 1 like 2	3.92824	-3.56859
CfaAffx.24998.1.S1_at	DOK3	docking protein 3	2.59586	-3.53379
Cfa.4775.1.A1_s_at	TTC39B	tetratricopeptide repeat domain 39B	2.7481	-3.52143
CfaAffx.29148.1.S1_at	FAM86A	family with sequence similarity 86, member A	17.4375	-3.52125
CfaAffx.21590.1.S1_at	TEX12	testis expressed 12	3.5169	-3.51708
CfaAffx.4015.1.S1_at	CD72	CD72 molecule	2.43499	-3.49237
CfaAffx.12224.1.S1_at	PIK3CB	phosphatidylinositol-4,5-bisphosphate 3-kinase, catalytic subunit beta	13.8672	-3.48966
Cfa.6022.1.A1_at	S100A2	S100 calcium binding protein A2	4.31381	-3.48851
CfaAffx.13809.1.S1_s_at	BACH1	BTB and CNC homology 1, basic leucine zipper transcription factor 1	2.68748	-3.47852
Cfa.7826.1.A1_s_at	MIER3	mesoderm induction early response 1, family member 3	2.54063	-3.47089
CfaAffx.1362.1.S1_at	TNFAIP3	tumor necrosis factor, alpha-induced protein 3	3.36151	-3.46415
CfaAffx.10605.1.S1_s_at	CDV3	CDV3 homolog (mouse)	4.51236	-3.457
CfaAffx.6589.1.S1_s_at	SLC41A3	solute carrier family 41, member 3	2.00743	-3.44094
CfaAffx.7680.1.S1_s_at	CCDC17	coiled-coil domain containing 17	3.74139	-3.43632
Cfa.7788.1.A1_s_at	PGS1	phosphatidylglycerophosphate synthase 1	2.16932	-3.43172
Cfa.10538.1.A1_at	GSAP	gamma-secretase activating protein	2.28462	-3.41722
CfaAffx.131.1.S1_at	FAM26F	family with sequence similarity 26, member F	2.73701	-3.39132
CfaAffx.31261.1.S1_at	CMTM4	CKLF-like MARVEL transmembrane domain containing 4	2.60522	-3.37721
CfaAffx.7283.1.S1_at	SLC36A4	solute carrier family 36 (proton/amino acid symporter), member 4	22.03	-3.37516
CfaAffx.28215.1.S1_s_at	LPIN2	lipin 2	2.44203	-3.37243
CfaAffx.12164.1.S1_at	MRAS	muscle RAS oncogene homolog	4.68761	-3.36255
CfaAffx.17050.1.S1_at	ARHGAP31	Rho GTPase activating protein 31	5.14664	-3.35267
CfaAffx.21706.1.S1_at	CCDC50	coiled-coil domain containing 50	5.68983	-3.34329
CfaAffx.18779.1.S1_at	SEMA4B	sema domain, immunoglobulin domain (Ig), transmembrane domain (TM) and short cytoplasmic domain, (semaphorin) 4B	3.33819	-3.33819
CfaAffx.14879.1.S1_s_at	CD82	CD82 molecule	2.56926	-3.33023
Cfa.106.1.S1_s_at	APP	amyloid beta (A4) precursor protein	2.14823	-3.32554
Cfa.5163.1.A1_at	RAB20	RAB20, member RAS oncogene family	3.0284	-3.31338
CfaAffx.13027.1.S1_s_at	ARFIP1	ADP-ribosylation factor interacting protein 1	6.76019	-3.29741
Cfa.10624.1.A1_at	SHROOM1	shroom family member 1	4.00924	-3.28984
CfaAffx.11211.1.S1_s_at	ZFAND4	zinc finger, AN1-type domain 4	2.71503	-3.28852
Cfa.1734.1.S2_at	NPC1	Niemann-Pick disease, type C1	3.85617	-3.2879
Cfa.17444.1.S1_at	GOLGA2	golgin A2	5.85185	-3.28695
CfaAffx.10800.1.S1_s_at	EOGT	glycosyltransferase AER61	18.3418	-3.27585
Cfa.2933.1.S1_at	STBD1	starch binding domain 1	2.37319	-3.2717
CfaAffx.839.1.S1_at	ZHX1	zinc fingers and homeoboxes 1	4.07936	-3.26175
CfaAffx.18575.1.S1_at	XKR8	XK, Kell blood group complex subunit-related family, member 8	3.23641	-3.2617
Cfa.10574.1.A1_at	AKAP2	A kinase (PRKA) anchor protein 2	3.364	-3.25306
CfaAffx.11211.1.S1_at	ZFAND4	zinc finger, AN1-type domain 4	2.83082	-3.24028
Cfa.13623.1.A1_at	SFT2D2	SFT2 domain containing 2	2.28078	-3.20979
CfaAffx.21583.1.S1_at	MTHFS	5,10-methenyltetrahydrofolate synthetase (5-formyltetrahydrofolate cyclo-ligase)	8.29079	-3.2067
Cfa.2086.1.A1_at	NRP2	neuropilin 2	5.23339	-3.20624
Cfa.4374.1.S1_s_at	SELM	selenoprotein M	17.328	-3.19438
Cfa.18659.1.S1_at	MGST1	microsomal glutathione S-transferase 1	5.73274	-3.1795
CfaAffx.22823.1.S1_at	SH3BP2	SH3-domain binding protein 2	5.58295	-3.17087
Cfa.17747.1.S1_s_at	TMBIM1	transmembrane BAX inhibitor motif containing 1	11.5884	-3.16854
Cfa.3731.1.S1_s_at	RAB12	RAB12, member RAS oncogene family	2.03446	-3.15875
Cfa.2604.1.S1_at	HECW2	HECT, C2 and WW domain containing E3 ubiquitin protein ligase 2	3.02644	-3.14935
CfaAffx.3543.1.S1_at	TMEM229A	transmembrane protein 229A	3.13997	-3.13997
Cfa.19710.1.S1_at	MBD4	methyl-CpG binding domain protein 4	4.18201	-3.13374
CfaAffx.22446.1.S1_at	LOC100686271 /// PILRA	paired immunoglobulin-like type 2 receptor alpha-like /// paired immunoglobin-like type 2 receptor alpha	5.53049	-3.12118
CfaAffx.19351.1.S1_s_at	PEA15	phosphoprotein enriched in astrocytes 15	3.24198	-3.12112
Cfa.1016.1.A1_s_at	ENPP2	ectonucleotide pyrophosphatase/phosphodiesterase 2	8.2469	-3.06758
CfaAffx.4144.1.S1_s_at	MAP4K4	mitogen-activated protein kinase kinase kinase kinase 4	3.61013	-3.04093
Cfa.747.1.A1_at	LPGAT1	lysophosphatidylglycerol acyltransferase 1	2.47875	-3.03287
CfaAffx.20330.1.S1_at	REEP3	receptor accessory protein 3	2.29925	-3.0296
Cfa.10411.1.A1_at	LPGAT1	lysophosphatidylglycerol acyltransferase 1	2.60565	-3.01079
CfaAffx.15117.1.S1_s_at	BMP1	bone morphogenetic protein 1	3.00991	-3.0079
CfaAffx.25724.1.S1_at	UBTD2	ubiquitin domain containing 2	2.73346	-2.97167
CfaAffx.13613.1.S1_s_at	SCARB2	scavenger receptor class B, member 2	2.32212	-2.96996
Cfa.5509.1.A1_at	PLXNA1	plexin A1	5.78164	-2.96117
Cfa.17652.1.S1_s_at	STIM1	stromal interaction molecule 1	2.26515	-2.94878
Cfa.12230.1.A1_at	MYO1C	myosin IC	2.97434	-2.94878
Cfa.168.1.S1_at	BHLHE41	basic helix-loop-helix family, member e41	3.37182	-2.92835
Cfa.549.1.S1_at	AHI1	Abelson helper integration site 1	4.3394	-2.92218
CfaAffx.16095.1.S1_at	MYBPH	myosin binding protein H	2.93051	-2.90963
Cfa.6440.1.A1_s_at	LOC102155693	uncharacterized LOC102155693	2.12743	-2.90884
CfaAffx.23526.1.S1_at	SFT2D2	SFT2 domain containing 2	2.23606	-2.89768
Cfa.3510.2.S1_s_at	CXCL8	interleukin 8	8.03355	-2.88486
Cfa.12342.1.A1_at	CCDC17	coiled-coil domain containing 17	3.72742	-2.88215
CfaAffx.18999.1.S1_s_at	RAB4A	RAB4A, member RAS oncogene family	4.15946	-2.87751
CfaAffx.26189.1.S1_s_at	DNASE2	deoxyribonuclease II, lysosomal	2.82224	-2.87094
CfaAffx.9224.1.S1_at	ACVR2A	activin A receptor, type IIA	2.78256	-2.86921
CfaAffx.10605.1.S1_at	CDV3	CDV3 homolog (mouse)	3.32494	-2.85848
Cfa.11465.1.A1_at	LOC100686256	uncharacterized LOC100686256	2.38139	-2.85792
Cfa.2772.2.S1_s_at	DAGLB	diacylglycerol lipase, beta	3.72831	-2.85392
Cfa.1396.1.A1_at	GOLGA2	golgin A2	3.50848	-2.84917
CfaAffx.10681.1.S1_s_at	GSR	glutathione reductase	2.37577	-2.8429
Cfa.6273.1.S1_s_at	SERPINB6	serpin peptidase inhibitor, clade B (ovalbumin), member 6	42.0324	-2.83875
Cfa.1629.1.A1_at	DMXL2	Dmx-like 2	3.25732	-2.83611
CfaAffx.30409.1.S1_s_at	RALGDS	ral guanine nucleotide dissociation stimulator	3.01652	-2.83494
CfaAffx.16140.1.S1_at	STX3	syntaxin 3	3.6564	-2.83402
CfaAffx.19024.1.S1_at	RHOU	ras homolog family member U	2.82861	-2.82861
Cfa.11838.1.A1_s_at	TMX4	thioredoxin-related transmembrane protein 4	3.83836	-2.82839
Cfa.12441.1.S1_s_at	NFKBIA	nuclear factor of kappa light polypeptide gene enhancer in B-cells inhibitor, alpha	2.04326	-2.82626
Cfa.17365.1.S1_at	CDV3	CDV3 homolog (mouse)	4.02484	-2.82029
Cfa.8017.1.A1_at	HOOK2	hook microtubule-tethering protein 2	3.31739	-2.81935
CfaAffx.30189.1.S1_s_at	PIK3CD	phosphatidylinositol-4,5-bisphosphate 3-kinase, catalytic subunit delta	2.00404	-2.81059
CfaAffx.4754.1.S1_at	TMEM150B	transmembrane protein 150B	2.51514	-2.8103
Cfa.9355.1.A1_at	ECSCR	endothelial cell surface expressed chemotaxis and apoptosis regulator	4.17153	-2.79466
CfaAffx.18384.1.S1_s_at	MED18	mediator complex subunit 18	2.03053	-2.79375
CfaAffx.25972.1.S1_at	RAB8B	RAB8B, member RAS oncogene family	2.16981	-2.79104
CfaAffx.5970.1.S1_s_at	MTPN	myotrophin	2.40857	-2.76396
CfaAffx.20797.1.S1_at	C7H1orf21	chromosome 7 open reading frame, human C1orf21	5.74698	-2.74984
Cfa.6832.1.A1_at	SLC2A6	solute carrier family 2 (facilitated glucose transporter), member 6	4.01745	-2.74974
CfaAffx.6452.1.S1_s_at	TBC1D9	TBC1 domain family, member 9 (with GRAM domain)	2.93123	-2.73688
CfaAffx.13423.1.S1_s_at	FMNL3	formin-like 3	2.28988	-2.73502
CfaAffx.9391.1.S1_s_at	NFKBIB	nuclear factor of kappa light polypeptide gene enhancer in B-cells inhibitor, beta	3.06464	-2.72235
CfaAffx.18370.1.S1_s_at	PHACTR4	phosphatase and actin regulator 4	2.45525	-2.71745
Cfa.20999.1.S1_s_at	ABI1	abl-interactor 1	2.73762	-2.71317
CfaAffx.19856.1.S1_at	B4GALT3	UDP-Gal:betaGlcNAc beta 1,4- galactosyltransferase, polypeptide 3	2.90333	-2.7026
Cfa.5515.1.S1_at	F11R	F11 receptor	4.08074	-2.69743
Cfa.6273.1.S1_at	SERPINB6	serpin peptidase inhibitor, clade B (ovalbumin), member 6	26.9764	-2.68489
Cfa.19475.2.S1_s_at	STX2	syntaxin 2	3.73704	-2.68112
CfaAffx.30939.1.S1_at	GBP6	guanylate binding protein family, member 6	2.83337	-2.68033
CfaAffx.15209.1.S1_s_at	SYS1	SYS1 Golgi-localized integral membrane protein homolog (S. cerevisiae)	2.29609	-2.67901
CfaAffx.27849.1.S1_at	NPC1	Niemann-Pick disease, type C1	3.00845	-2.67824
Cfa.1734.1.S1_s_at	NPC1	Niemann-Pick disease, type C1	2.72756	-2.64528
CfaAffx.9224.1.S1_s_at	ACVR2A	activin A receptor, type IIA	2.09322	-2.64451
CfaAffx.1425.1.S1_at	STX11	syntaxin 11	2.06879	-2.63534
CfaAffx.3174.1.S1_at	NCF4	neutrophil cytosolic factor 4, 40kDa	3.11868	-2.63422
Cfa.12365.1.A1_at	ZDHHC14	zinc finger, DHHC-type containing 14	15.473	-2.62198
CfaAffx.8895.1.S1_s_at	YPEL5	yippee-like 5 (Drosophila)	2.05408	-2.6173
Cfa.6751.1.A1_a_at	CCDC101	coiled-coil domain containing 101	2.61148	-2.61148
Cfa.21225.1.S1_at	MAP2K2	mitogen-activated protein kinase kinase 2	2.02073	-2.60853
CfaAffx.30976.1.S1_at	NEK6	NIMA-related kinase 6	2.83035	-2.60227
CfaAffx.14321.1.S1_at	IL10RB /// LOC100856489	interleukin 10 receptor, beta /// interleukin-10 receptor subunit beta-like	2.06462	-2.59788
Cfa.15180.1.S1_at	ZHX1	zinc fingers and homeoboxes 1	4.12458	-2.57728
CfaAffx.30811.1.S1_s_at	GCLM	glutamate-cysteine ligase, modifier subunit	4.14512	-2.57448
Cfa.4450.1.S1_at	APLP1	amyloid beta (A4) precursor-like protein 1	6.52209	-2.57075
CfaAffx.9108.1.S1_at	TGFBR2	transforming growth factor, beta receptor II (70/80kDa)	2.64676	-2.56101
Cfa.15767.1.A1_at	FMNL3	formin-like 3	2.1959	-2.5459
CfaAffx.12658.1.S1_s_at	ELL2	elongation factor, RNA polymerase II, 2	2.16374	-2.53932
CfaAffx.23010.1.S1_s_at	EIF5A2	eukaryotic translation initiation factor 5A2	3.48191	-2.52934
CfaAffx.28317.1.S1_at	TNFRSF13B	tumor necrosis factor receptor superfamily, member 13B	2.40135	-2.52275
CfaAffx.1781.1.S1_at	CSNK1G3	casein kinase 1, gamma 3	3.1091	-2.51625
Cfa.20858.1.S1_s_at	PPP2R5A	protein phosphatase 2, regulatory subunit B', alpha	2.17838	-2.5116
Cfa.3112.1.S1_at	SDC4	syndecan 4	3.40114	-2.49071
Cfa.8283.1.A1_s_at	C7H1orf21	chromosome 7 open reading frame, human C1orf21	3.96008	-2.48532
CfaAffx.18596.1.S1_at	PDZD8	PDZ domain containing 8	2.88773	-2.47203
CfaAffx.24345.1.S1_at	SCCPDH	saccharopine dehydrogenase (putative)	2.53518	-2.46938
Cfa.2937.1.A1_at	PLA2G4A	phospholipase A2, group IVA (cytosolic, calcium-dependent)	2.1708	-2.4692
CfaAffx.30277.1.S1_s_at	KIF1B	kinesin family member 1B	3.38994	-2.45743
CfaAffx.2303.1.S1_at	NUS1	nuclear undecaprenyl pyrophosphate synthase 1 homolog (S. cerevisiae)	2.36936	-2.44767
Cfa.7093.1.A1_at	CECR1	cat eye syndrome chromosome region, candidate 1	2.74828	-2.44318
Cfa.16469.1.S1_x_at	SERPINA1	serpin peptidase inhibitor, clade A (alpha-1 antiproteinase, antitrypsin), member 1	2.14607	-2.44219
Cfa.8269.1.A1_at	ARRDC5	arrestin domain containing 5	4.41435	-2.43664
Cfa.13314.1.A1_at	SRXN1	sulfiredoxin 1	2.01082	-2.42357
Cfa.18170.1.S1_s_at	DPYSL2	dihydropyrimidinase-like 2	2.67631	-2.42336
CfaAffx.10946.1.S1_at	ERI1	exoribonuclease 1	2.79695	-2.42038
CfaAffx.30865.1.S1_s_at	EVI5	ecotropic viral integration site 5	3.24797	-2.41977
CfaAffx.3174.1.S1_s_at	NCF4	neutrophil cytosolic factor 4, 40kDa	2.67616	-2.4117
Cfa.9844.1.A1_at	ARHGAP31	Rho GTPase activating protein 31	10.4909	-2.40572
Cfa.4553.1.A1_at	MCPH1	microcephalin 1	3.61008	-2.40218
Cfa.18963.1.S1_s_at	VPS41	vacuolar protein sorting 41 homolog (S. cerevisiae)	2.44931	-2.39234
CfaAffx.18284.1.S1_at	TPST2	tyrosylprotein sulfotransferase 2	2.00035	-2.39028
Cfa.11838.1.A1_at	TMX4	thioredoxin-related transmembrane protein 4	4.05943	-2.38519
Cfa.17933.1.S1_s_at	DLA-79	MHC class Ib	3.52576	-2.38102
CfaAffx.28533.1.S1_s_at	RAB12	RAB12, member RAS oncogene family	2.14897	-2.37932
Cfa.14033.1.A1_at	ZFAND2A	zinc finger, AN1-type domain 2A	2.83658	-2.37127
Cfa.913.2.A1_at	GSK3B	glycogen synthase kinase 3 beta	3.70284	-2.37006
CfaAffx.17877.1.S1_s_at	BCAT1	branched chain amino-acid transaminase 1, cytosolic	13.3322	-2.36919
CfaAffx.28410.1.S1_s_at	PDE4B	phosphodiesterase 4B, cAMP-specific	2.45983	-2.35554
Cfa.19475.1.S1_at	STX2	syntaxin 2	3.32639	-2.35523
CfaAffx.22358.1.S1_at	ZCWPW1	zinc finger, CW type with PWWP domain 1	3.38133	-2.35253
Cfa.1284.2.S1_at	TRAF3IP2	TRAF3 interacting protein 2	6.61511	-2.34583
Cfa.14397.1.S1_at	SOD2	superoxide dismutase 2, mitochondrial	4.53351	-2.34301
Cfa.285.2.S1_s_at	LAP3	leucine aminopeptidase 3	4.15797	-2.32712
Cfa.16823.1.S1_at	MALSU1	mitochondrial assembly of ribosomal large subunit 1	2.05666	-2.31527
Cfa.7713.1.A1_at	LATS2	large tumor suppressor kinase 2	2.51202	-2.30977
CfaAffx.12327.1.S1_at	FAM111B	family with sequence similarity 111, member B	2.3362	-2.30484
CfaAffx.2655.1.S1_s_at	SGSM3	small G protein signaling modulator 3	2.29393	-2.30394
Cfa.21563.1.S1_s_at	GRN	granulin	4.29682	-2.30089
CfaAffx.11256.1.S1_at	VPS37A	vacuolar protein sorting 37 homolog A (S. cerevisiae)	2.35682	-2.30087
Cfa.4764.1.A1_at	CDC42EP4	CDC42 effector protein (Rho GTPase binding) 4	3.29996	-2.30029
Cfa.18879.1.S1_at	ASPH	aspartate beta-hydroxylase	3.83681	-2.29459
CfaAffx.6858.1.S1_s_at	LOC483833 /// NANP	N-acylneuraminate-9-phosphatase-like /// N-acetylneuraminic acid phosphatase	2.50228	-2.28732
CfaAffx.3399.1.S1_at	IMPDH1	IMP (inosine 5'-monophosphate) dehydrogenase 1	2.70483	-2.27401
CfaAffx.7838.1.S1_s_at	CD300LF	CD300 molecule-like family member f	3.35485	-2.27353
Cfa.5462.1.A1_at	ZFAND2A	zinc finger, AN1-type domain 2A	2.05592	-2.27107
CfaAffx.17674.1.S1_at	ADAP1	ArfGAP with dual PH domains 1	2.79026	-2.26851
Cfa.17019.1.S1_s_at	EVI5	ecotropic viral integration site 5	3.22186	-2.26606
Cfa.5462.1.A1_s_at	ZFAND2A	zinc finger, AN1-type domain 2A	2.02356	-2.25216
CfaAffx.19759.1.S1_at	SNX27 /// TUFT1	sorting nexin family member 27 /// tuftelin 1	2.99358	-2.24963
CfaAffx.17875.1.S1_at	BCAT1	branched chain amino-acid transaminase 1, cytosolic	8.626	-2.24927
CfaAffx.12881.1.S1_at	FAM172A	family with sequence similarity 172, member A	2.12007	-2.24528
CfaAffx.26607.1.S1_s_at	PRKCSH	protein kinase C substrate 80K-H	2.63486	-2.24367
Cfa.2014.1.A1_at	KLHL21	kelch-like family member 21	2.84144	-2.24354
Cfa.14264.1.A1_at	SLC31A1	solute carrier family 31 (copper transporter), member 1	4.01731	-2.24267
CfaAffx.6255.1.S1_s_at	AP2A1	adaptor-related protein complex 2, alpha 1 subunit	5.55377	-2.23695
CfaAffx.15873.1.S1_s_at	APLP2	amyloid beta (A4) precursor-like protein 2	4.8878	-2.23557
Cfa.14244.1.A1_at	FAM175B	family with sequence similarity 175, member B	2.57256	-2.23246
CfaAffx.14682.1.S1_s_at	SERPINB6	serpin peptidase inhibitor, clade B (ovalbumin), member 6	16.0442	-2.22153
CfaAffx.14689.1.S1_s_at	HIPK1	homeodomain interacting protein kinase 1	2.07799	-2.22107
CfaAffx.19123.1.S1_at	PPP2R5A	protein phosphatase 2, regulatory subunit B', alpha	2.26664	-2.21192
CfaAffx.11075.1.S1_at	ST18	suppression of tumorigenicity 18 (breast carcinoma) (zinc finger protein)	2.80004	-2.20322
Cfa.9061.1.S1_at	STARD3NL	STARD3 N-terminal like	2.15394	-2.19995
CfaAffx.18574.1.S1_s_at	ARHGEF12	Rho guanine nucleotide exchange factor (GEF) 12	3.764	-2.19373
Cfa.11618.1.A1_s_at	DESI1	desumoylating isopeptidase 1	3.42573	-2.1932
Cfa.8476.1.S1_s_at	LOC478288	biogenesis of lysosome-related organelles complex 1 subunit 6-like	2.52253	-2.19207
CfaAffx.29296.1.S1_s_at	SCARF1	scavenger receptor class F, member 1	4.09763	-2.16963
CfaAffx.14943.1.S1_at	ACCS	1-aminocyclopropane-1-carboxylate synthase homolog (Arabidopsis)(non-functional)	2.06101	-2.16492
Cfa.4166.1.S1_s_at	HSP90AB1 /// SLC29A1	heat shock protein 90kDa alpha (cytosolic), class B member 1 /// solute carrier family 29 (nucleoside transporters), member 1	3.8555	-2.14716
CfaAffx.5540.1.S1_s_at	PLEKHA8	pleckstrin homology domain containing, family A (phosphoinositide binding specific) member 8	6.81246	-2.14319
Cfa.5433.1.A1_at	SCCPDH	saccharopine dehydrogenase (putative)	2.95193	-2.13029
Cfa.7948.2.A1_s_at	SND1	staphylococcal nuclease and tudor domain containing 1	2.06069	-2.12824
Cfa.1709.1.S1_at	ACVR2A	activin A receptor, type IIA	2.11432	-2.12767
Cfa.1239.1.S1_s_at	MAPK14	mitogen-activated protein kinase 14	2.71834	-2.11979
Cfa.15207.1.S1_s_at	TMEM41B	transmembrane protein 41B	4.97893	-2.11807
Cfa.18746.1.S1_s_at	PPAP2C	phosphatidic acid phosphatase type 2C	6.39577	-2.11497
CfaAffx.9388.1.S1_at	NFKBIB	nuclear factor of kappa light polypeptide gene enhancer in B-cells inhibitor, beta	2.26626	-2.11255
CfaAffx.24403.1.S1_s_at	CCDC22	coiled-coil domain containing 22	4.03197	-2.10883
CfaAffx.14846.1.S1_s_at	CDYL	chromodomain protein, Y-like	2.78961	-2.09487
Cfa.9484.1.A1_s_at	LOC100856167	malcavernin-like	2.02023	-2.08793
Cfa.21004.1.S1_s_at	ENPP5	ectonucleotide pyrophosphatase/phosphodiesterase 5 (putative)	4.28126	-2.068
CfaAffx.19606.1.S1_at	TOR1AIP2	torsin A interacting protein 2	2.24476	-2.06193
Cfa.467.1.S1_at	EXOC6B	exocyst complex component 6B	3.06797	-2.06192
Cfa.9957.1.A1_at	MAPK14	mitogen-activated protein kinase 14	2.50577	-2.05361
CfaAffx.30864.1.S1_at	EVI5	ecotropic viral integration site 5	2.82498	-2.04833
CfaAffx.16724.1.S1_s_at	NLRP3	NLR family, pyrin domain containing 3	3.73521	-2.0449
Cfa.13983.1.S1_s_at	ABCD3	ATP-binding cassette, sub-family D (ALD), member 3	3.08362	-2.04005
Cfa.8455.2.S1_at	RAB4A	RAB4A, member RAS oncogene family	2.48506	-2.03399
Cfa.11928.1.A1_at	TCF25	transcription factor 25 (basic helix-loop-helix)	2.40492	-2.03275
Cfa.19681.1.S1_s_at	MVP	major vault protein	2.87898	-2.02901
Cfa.16401.1.S1_s_at	CPEB4	cytoplasmic polyadenylation element binding protein 4	4.65611	-2.02868
CfaAffx.2947.1.S1_at	MAPK14	mitogen-activated protein kinase 14	2.18756	-2.01757

## Sheet: M2 probesets
Probe Set ID	Gene Symbol	Gene Title	FC_M2vsM0	FC_M2vsM1
Cfa.11125.1.A1_at	SCN2B	sodium channel, voltage-gated, type II, beta subunit	1061.28	1120.45
Cfa.15823.1.S1_at	CCL24	chemokine (C-C motif) ligand 24	1060.82	1050.11
CfaAffx.18273.1.S1_at	FCER1A	Fc fragment of IgE, high affinity I, receptor for; alpha polypeptide	35.6332	922.723
CfaAffx.20721.1.S1_s_at	CCL24	chemokine (C-C motif) ligand 24	819.064	819.064
Cfa.17541.1.S1_s_at	FBP1	fructose-1,6-bisphosphatase 1	160.016	748.695
CfaAffx.2850.1.S1_s_at	FBP1	fructose-1,6-bisphosphatase 1	57.9493	422.211
Cfa.3663.1.A1_s_at	FCER1A	Fc fragment of IgE, high affinity I, receptor for; alpha polypeptide	21.0708	376.894
Cfa.3707.1.A1_at	FN1	fibronectin 1	12.6789	360.419
CfaAffx.12229.1.S1_at	LYVE1	lymphatic vessel endothelial hyaluronan receptor 1	322.324	321.107
Cfa.10966.1.A1_at	DNM1	dynamin 1	112.784	247.102
Cfa.6272.1.S1_at	CALD1	caldesmon 1	224.662	239.745
CfaAffx.1504.1.S1_s_at	UST	uronyl-2-sulfotransferase	7.71322	226.475
Cfa.2693.1.A1_at	LOC102152647	uncharacterized LOC102152647	194.283	194.283
Cfa.3707.1.A1_s_at	FN1	fibronectin 1	7.26433	188.317
CfaAffx.28024.1.S1_at	CLEC4G	C-type lectin domain family 4, member G	54.1446	183.13
CfaAffx.16206.1.S1_at	MS4A2	membrane-spanning 4-domains, subfamily A, member 2	110.048	167.77
Cfa.6369.1.A1_at	FBP1	fructose-1,6-bisphosphatase 1	26.984	149.726
Cfa.20346.1.S1_at	ARHGAP6	Rho GTPase activating protein 6	37.988	147.581
Cfa.1705.1.A1_at	JAM3	junctional adhesion molecule 3	78.4649	145.242
Cfa.3662.1.S1_at	MS4A2	membrane-spanning 4-domains, subfamily A, member 2	54.983	137.947
Cfa.19567.1.S1_at	UST	uronyl-2-sulfotransferase	8.047	120.815
CfaAffx.16206.1.S1_s_at	MS4A2	membrane-spanning 4-domains, subfamily A, member 2	76.564	108.606
Cfa.3774.1.A1_s_at	ANPEP	alanyl (membrane) aminopeptidase	25.5487	105.725
Cfa.14465.1.S1_at	NPNT	nephronectin	444.07	105.07
Cfa.688.1.S1_at	cfa-mir-125b-2	cfa-mir-125b-2	58.7767	103.61
CfaAffx.7700.1.S1_s_at	MRC1	mannose receptor, C type 1	136.987	89.1416
Cfa.2468.1.A1_at	UST	uronyl-2-sulfotransferase	6.54192	85.1965
Cfa.10794.1.A1_at	SCG5	secretogranin V (7B2 protein)	6.75419	82.6906
Cfa.20798.1.S1_at	ANPEP	alanyl (membrane) aminopeptidase	14.09	82.1287
CfaAffx.14701.1.S1_s_at	STAB1	stabilin 1	3.99843	81.4139
CfaAffx.28463.1.S1_at	C3	complement component 3	36.5274	76.4521
Cfa.12240.1.A1_at	C3	complement component 3	44.1383	67.7846
CfaAffx.16904.1.S1_s_at	TGFB2	transforming growth factor, beta 2	61.8356	66.9713
CfaAffx.7365.1.S1_at	CST9	cystatin 9 (testatin)	58.2065	58.5257
CfaAffx.15901.1.S1_s_at	LPL	lipoprotein lipase	52.0305	57.3919
CfaAffx.7698.1.S1_at	MRC1	mannose receptor, C type 1	104.415	52.6836
Cfa.78.1.S1_s_at	SLC15A1	solute carrier family 15 (oligopeptide transporter), member 1	14.6506	52.0324
CfaAffx.27914.1.S1_s_at	IL13RA2	interleukin 13 receptor, alpha 2	170.587	46.7
Cfa.19638.1.S1_s_at	TMLHE	trimethyllysine hydroxylase, epsilon	51.0469	45.5478
CfaAffx.22229.1.S1_at	GPR34	G protein-coupled receptor 34	6.30207	42.3857
CfaAffx.21392.1.S1_s_at	FKBP7	FK506 binding protein 7	25.805	40.6024
CfaAffx.19151.1.S1_s_at	ADCY4	adenylate cyclase 4	14.0695	39.0218
Cfa.11222.1.A1_s_at	FAM185A	family with sequence similarity 185, member A	23.0744	38.0318
Cfa.10053.1.A1_at	RAB40B	RAB40B, member RAS oncogene family	48.8574	37.8836
CfaAffx.24797.1.S1_at	EPHX1	epoxide hydrolase 1, microsomal (xenobiotic)	3.75146	36.8209
Cfa.1930.1.S1_at	MRC1	mannose receptor, C type 1	25.704	36.7604
Cfa.3367.1.A1_at	TGFB2	transforming growth factor, beta 2	36.4929	36.5778
Cfa.15824.1.S1_at	CCL13	chemokine (C-C motif) ligand 13	172.585	34.7063
Cfa.14297.1.A1_s_at	MAOB	monoamine oxidase B	33.7519	33.7509
Cfa.12621.1.A1_at	LRP4	low density lipoprotein receptor-related protein 4	7.01059	33.0124
CfaAffx.17163.1.S1_s_at	SLC37A2	solute carrier family 37 (glucose-6-phosphate transporter), member 2	3.71783	32.8206
Cfa.13730.1.A1_at	NPNT	nephronectin	33.6259	31.661
CfaAffx.4092.1.S1_s_at	LOC481325 /// UBE2C	ubiquitin-conjugating enzyme E2 C-like /// ubiquitin-conjugating enzyme E2C	151.231	31.4293
Cfa.3590.1.S1_s_at	EDNRB	endothelin receptor type B	35.1208	30.8286
Cfa.19985.1.S1_s_at	LOC475240	asparagine synthetase [glutamine-hydrolyzing]-like	9.60414	30.6437
CfaAffx.20430.1.S1_at	TM6SF1	transmembrane 6 superfamily member 1	5.96585	28.2508
Cfa.14413.1.S1_at	PROS1	protein S (alpha)	17.3442	27.8847
CfaAffx.21599.1.S1_s_at	RALGPS2	Ral GEF with PH domain and SH3 binding motif 2	21.7129	27.5231
Cfa.11669.1.A1_s_at	MYBPC2	myosin binding protein C, fast type	24.9949	27.3151
Cfa.164.1.A1_at	ANTXR1	anthrax toxin receptor 1	72.9474	27.0066
Cfa.309.1.S1_at	MYL4	myosin, light chain 4, alkali; atrial, embryonic	14.4038	25.9758
CfaAffx.3284.1.S1_at	TREM2	triggering receptor expressed on myeloid cells 2	2.70082	25.9465
Cfa.8783.1.S1_s_at	PTTG1	pituitary tumor-transforming 1	26.0145	25.5811
Cfa.11046.1.A1_s_at	OMG	oligodendrocyte myelin glycoprotein	23.7117	25.5652
Cfa.5302.1.A1_at	HMGB3	high mobility group box 3	27.669	25.5237
CfaAffx.12527.1.S1_at	ARHGAP10	Rho GTPase activating protein 10	31.8853	25.5166
Cfa.15698.1.A1_at	CALD1	caldesmon 1	23.1398	25.0489
CfaAffx.22355.1.S1_at	BCHE	butyrylcholinesterase	5.43436	24.8322
Cfa.15237.1.S1_at	GOLIM4	golgi integral membrane protein 4	2.30881	24.781
Cfa.19423.1.S1_at	L3HYPDH	L-3-hydroxyproline dehydratase (trans-)	15.1269	24.7052
Cfa.4077.1.S1_at	CA4	carbonic anhydrase IV	25.8628	24.5299
CfaAffx.14437.1.S1_at	IRF4	interferon regulatory factor 4	23.1043	23.4782
Cfa.4077.1.S1_s_at	CA4	carbonic anhydrase IV	20.716	22.9475
Cfa.16308.1.S1_a_at	PMP22	peripheral myelin protein 22	22.7964	22.8898
CfaAffx.13861.1.S1_s_at	ATP6V0D2	ATPase, H+ transporting, lysosomal 38kDa, V0 subunit d2	27.8348	22.8437
Cfa.16302.1.A1_at	FAM198B	family with sequence similarity 198, member B	26.1732	22.6574
CfaAffx.6499.1.S1_at	SHCBP1	SHC SH2-domain binding protein 1	39.9028	21.9581
Cfa.1928.1.S1_at	SHCBP1	SHC SH2-domain binding protein 1	117.775	21.3927
CfaAffx.3283.1.S1_s_at	TREM2	triggering receptor expressed on myeloid cells 2	4.52253	21.3867
Cfa.9602.1.A1_at	BAALC	brain and acute leukemia, cytoplasmic	20.8558	21.2125
CfaAffx.20430.1.S1_s_at	TM6SF1	transmembrane 6 superfamily member 1	5.31398	21.1907
Cfa.6138.1.A1_at	EMR4	EGF-like module containing, mucin-like, hormone receptor-like sequence 4	6.61842	21.0619
Cfa.85.1.S1_s_at	RAD51	RAD51 homolog (S. cerevisiae)	43.9865	19.6461
Cfa.11669.1.A1_at	MYBPC2	myosin binding protein C, fast type	20.2507	19.3801
CfaAffx.12118.1.S1_s_at	KIF11	kinesin family member 11	64.1961	19.336
Cfa.12008.1.A1_at	LOC475240	asparagine synthetase [glutamine-hydrolyzing]-like	7.28997	18.9164
Cfa.15293.1.A1_at	KIF23	kinesin family member 23	66.7781	18.6879
Cfa.12008.1.A1_s_at	LOC475240	asparagine synthetase [glutamine-hydrolyzing]-like	7.113	18.4398
Cfa.11307.1.A1_at	PARP2	poly (ADP-ribose) polymerase 2	24.9254	17.9739
CfaAffx.4044.1.S1_s_at	TPM2	tropomyosin 2 (beta)	11.6131	17.8796
Cfa.13267.1.A1_s_at	C3	complement component 3	15.1352	17.4118
CfaAffx.15143.1.S1_at	CBR3	carbonyl reductase 3	20.2472	17.2046
CfaAffx.30543.1.S1_at	ATP2C2	ATPase, Ca++ transporting, type 2C, member 2	3.27301	17.1448
CfaAffx.23752.1.S1_s_at	ECT2	epithelial cell transforming sequence 2 oncogene	34.869	17.0655
Cfa.11939.1.A1_s_at	CCNB2	cyclin B2	48.9503	17.017
Cfa.9040.1.A1_at	FLRT2	fibronectin leucine rich transmembrane protein 2	16.6308	16.7189
Cfa.19346.1.S1_at	TSPAN7	tetraspanin 7	32.2022	16.6811
Cfa.2644.1.A1_at	CA2	carbonic anhydrase II	5.39494	16.6712
CfaAffx.13062.1.S1_s_at	SCG5	secretogranin V (7B2 protein)	13.0958	16.6622
Cfa.2569.1.S1_s_at	CCDC80	coiled-coil domain containing 80	9.47457	16.6417
Cfa.10727.1.A1_at	LOC102153596	uncharacterized LOC102153596	9.17695	16.4482
CfaAffx.16690.1.S1_at	BANK1	B-cell scaffold protein with ankyrin repeats 1	9.55599	16.348
Cfa.10601.2.S1_a_at	TNFAIP8L3	tumor necrosis factor, alpha-induced protein 8-like 3	6.59274	16.0714
Cfa.8978.1.A1_at	GDA	guanine deaminase	174.438	15.9796
CfaAffx.9807.1.S1_x_at	RYR1	ryanodine receptor 1 (skeletal)	5.54514	15.8678
CfaAffx.12419.1.S1_s_at	CCNB1 /// LOC100688615	cyclin B1 /// G2/mitotic-specific cyclin-B1-like	46.9186	15.832
CfaAffx.24089.1.S1_at	LIPA	lipase A, lysosomal acid, cholesterol esterase	3.15405	15.4786
Cfa.19526.1.S1_s_at	ACTN1	actinin, alpha 1	22.3562	15.4618
Cfa.21063.1.S1_at	MIS18A	MIS18 kinetochore protein homolog A (S. pombe)	20.4821	15.1218
CfaAffx.9807.1.S1_s_at	RYR1	ryanodine receptor 1 (skeletal)	6.13693	14.9156
Cfa.10885.1.A1_at	L3HYPDH	L-3-hydroxyproline dehydratase (trans-)	9.67715	14.7207
CfaAffx.25315.1.S1_s_at	ACTN1	actinin, alpha 1	25.8821	14.4703
Cfa.4088.1.A1_at	EPHX1	epoxide hydrolase 1, microsomal (xenobiotic)	2.78625	14.222
CfaAffx.7108.1.S1_at	CCNA2	cyclin A2	33.6832	14.0508
CfaAffx.28793.1.S1_s_at	NFIA	nuclear factor I/A	3.01855	13.9322
Cfa.4354.1.S1_a_at	CRYL1	crystallin, lambda 1	10.3254	13.7736
Cfa.1849.1.A1_at	MRC1	mannose receptor, C type 1	22.1556	13.704
Cfa.5605.1.A1_at	TCTN2	tectonic family member 2	20.5563	13.6346
CfaAffx.14131.1.S1_at	C18H11orf49	chromosome 18 open reading frame, human C11orf49	9.22769	13.5984
CfaAffx.28220.1.S1_s_at	PEMT	phosphatidylethanolamine N-methyltransferase	18.8654	13.5946
Cfa.15584.1.A1_at	LOC102156419	uncharacterized LOC102156419	10.4204	13.4213
Cfa.15783.1.A1_at	FBP2	fructose-1,6-bisphosphatase 2	19.389	13.3275
CfaAffx.22366.1.S1_s_at	BCHE	butyrylcholinesterase	5.21451	13.198
CfaAffx.21784.1.S1_at	KIF15	kinesin family member 15	14.7941	12.9456
Cfa.14680.1.A1_at	TRAM2	translocation associated membrane protein 2	2.25738	12.9334
CfaAffx.26141.1.S1_s_at	CSNK1G1 /// KIAA0101	casein kinase 1, gamma 1 /// KIAA0101 ortholog	22.8884	12.8964
Cfa.17141.1.S1_at	KIF15	kinesin family member 15	37.4815	12.8666
CfaAffx.16494.1.S1_at	CD200R1	CD200 receptor 1	11.3002	12.8473
Cfa.18508.1.S1_s_at	CCNB2	cyclin B2	20.04	12.8094
CfaAffx.8734.1.S1_s_at	FANCD2 /// FANCD2OS	Fanconi anemia, complementation group D2 /// FANCD2 opposite strand	22.1056	12.7974
CfaAffx.7341.1.S1_at	FAM185A	family with sequence similarity 185, member A	12.3917	12.591
Cfa.6991.1.A1_at	LOC102152056	antigen KI-67-like	28.6523	12.5318
Cfa.5334.1.A1_at	LOC480601	regakine-1-like	4.56028	12.4056
CfaAffx.14101.1.S1_s_at	BUB1B	BUB1 mitotic checkpoint serine/threonine kinase B	32.1216	12.3458
CfaAffx.28376.1.S1_at	LOC100855754 /// LOC610669	EGF-like module-containing mucin-like hormone receptor-like 4-like /// EGF-like module-containing mucin-like hormone receptor-like 4-like	5.95944	12.2513
CfaAffx.3267.1.S1_at	PSAT1	phosphoserine aminotransferase 1	3.83809	12.1684
CfaAffx.13120.1.S1_s_at	MND1	meiotic nuclear divisions 1 homolog (S. cerevisiae)	34.7969	12.0792
Cfa.11307.1.A1_s_at	PARP2	poly (ADP-ribose) polymerase 2	17.8251	11.9379
Cfa.18946.1.S1_s_at	TOP2A	topoisomerase (DNA) II alpha 170kDa	30.7913	11.9335
CfaAffx.953.1.S1_s_at	HMGB3 /// LOC102156259	high mobility group box 3 /// high mobility group protein B3-like	13.0547	11.8963
Cfa.4373.1.A1_at	TSPAN7	tetraspanin 7	83.2478	11.8626
Cfa.7812.1.A1_at	KIF19	kinesin family member 19	3.53494	11.8539
CfaAffx.13116.1.S1_at	MND1	meiotic nuclear divisions 1 homolog (S. cerevisiae)	32.9282	11.8428
CfaAffx.20529.1.S1_at	NUF2	NUF2, NDC80 kinetochore complex component	54.624	11.8024
Cfa.2646.1.S1_at	KDELR3	KDEL (Lys-Asp-Glu-Leu) endoplasmic reticulum protein retention receptor 3	11.8207	11.7753
CfaAffx.23129.1.S1_at	DLGAP5	discs, large (Drosophila) homolog-associated protein 5	39.1151	11.7405
CfaAffx.19502.1.S1_at	CD84	CD84 molecule	6.69433	11.6548
Cfa.9064.1.A1_at	PLXNA2	plexin A2	11.6281	11.6049
CfaAffx.5597.1.S1_s_at	ANKRD6	ankyrin repeat domain 6	11.5311	11.5301
CfaAffx.28801.1.S1_s_at	GPC4	glypican 4	6.67717	11.4979
CfaAffx.27932.1.S1_s_at	SLC26A2	solute carrier family 26 (anion exchanger), member 2	7.80034	11.3819
CfaAffx.11798.1.S1_s_at	CRYL1	crystallin, lambda 1	13.2314	11.3356
CfaAffx.22581.1.S1_at	CDCA3	cell division cycle associated 3	26.1437	11.2832
Cfa.19552.1.S1_at	CSNK1G1 /// KIAA0101	casein kinase 1, gamma 1 /// KIAA0101 ortholog	19.2291	11.1076
Cfa.14066.1.A1_s_at	ATP6V0D2	ATPase, H+ transporting, lysosomal 38kDa, V0 subunit d2	18.1251	11.0634
CfaAffx.27927.1.S1_at	SLC26A2	solute carrier family 26 (anion exchanger), member 2	5.44423	10.9387
CfaAffx.14557.1.S1_at	CMSS1	cms1 ribosomal small subunit homolog (yeast)	4.69328	10.9146
Cfa.14607.1.A1_at	MXRA7	matrix-remodelling associated 7	11.0509	10.8995
CfaAffx.27812.1.S1_s_at	CCL14	chemokine (C-C motif) ligand 14	7.64667	10.862
Cfa.20194.1.S1_s_at	NUF2	NUF2, NDC80 kinetochore complex component	26.1626	10.8433
Cfa.1559.1.A1_at	BUB1	BUB1 mitotic checkpoint serine/threonine kinase	27.6368	10.8085
CfaAffx.12132.1.S1_s_at	CDK2AP1	cyclin-dependent kinase 2 associated protein 1	11.0511	10.7008
Cfa.12777.1.A1_at	CA5B	carbonic anhydrase VB, mitochondrial	4.29627	10.5358
Cfa.33.2.S1_s_at	TPMT	thiopurine S-methyltransferase	5.36433	10.4329
Cfa.15788.3.S1_at	TPM2	tropomyosin 2 (beta)	10.2011	10.2558
CfaAffx.26824.1.S1_s_at	KIF23	kinesin family member 23	13.286	10.1918
CfaAffx.23135.1.S1_s_at	DLGAP5	discs, large (Drosophila) homolog-associated protein 5	22.7118	10.1139
Cfa.2316.1.S1_at	PLA2R1	phospholipase A2 receptor 1, 180kDa	10.056	10.056
CfaAffx.19768.1.S1_at	MAN1C1	mannosidase, alpha, class 1C, member 1	9.4083	10.0467
Cfa.7736.1.A1_at	LOC480601	regakine-1-like	4.86144	10.0228
Cfa.12246.1.A1_at	MAN1C1	mannosidase, alpha, class 1C, member 1	9.60104	10.0127
Cfa.18211.1.A1_s_at	EFCAB11	EF-hand calcium binding domain 11	36.676	10.0095
Cfa.19487.1.S1_at	CCNB1 /// LOC100688615	cyclin B1 /// G2/mitotic-specific cyclin-B1-like	22.2405	9.99679
Cfa.16286.1.S1_at	IMMP2L	IMP2 inner mitochondrial membrane peptidase-like (S. cerevisiae)	3.95357	9.87399
CfaAffx.5187.1.S1_s_at	TTK	TTK protein kinase	11.5626	9.80332
Cfa.11725.1.A1_at	LOC479820	exonuclease NEF-sp	5.96897	9.80229
Cfa.16389.1.A1_s_at	MXRA7	matrix-remodelling associated 7	10.8628	9.80138
Cfa.299.1.A1_s_at	FABP3	fatty acid binding protein 3, muscle and heart (mammary-derived growth inhibitor)	11.0254	9.79845
Cfa.9685.2.S1_a_at	TSC22D1	TSC22 domain family, member 1	8.36209	9.75935
CfaAffx.5861.1.S1_s_at	IMMP2L	IMP2 inner mitochondrial membrane peptidase-like (S. cerevisiae)	3.76437	9.7527
Cfa.11769.1.A1_at	MORN2	MORN repeat containing 2	32.8305	9.67333
CfaAffx.9377.1.S1_s_at	SLC4A7	solute carrier family 4, sodium bicarbonate cotransporter, member 7	2.93275	9.63403
Cfa.19323.1.S1_at	FLT1	fms-related tyrosine kinase 1 (vascular endothelial growth factor/vascular permeability factor receptor)	28.9233	9.60641
Cfa.11687.1.A1_at	CCDC146	coiled-coil domain containing 146	10.0458	9.60284
Cfa.15494.1.A1_at	PEMT	phosphatidylethanolamine N-methyltransferase	9.02672	9.54564
CfaAffx.21784.1.S1_s_at	KIF15	kinesin family member 15	10.7322	9.53867
CfaAffx.25468.1.S1_at	MYO1E	myosin IE	26.9062	9.53654
CfaAffx.24713.1.S1_at	CDC6	cell division cycle 6	17.1048	9.51804
Cfa.14472.1.A1_at	CCL14	chemokine (C-C motif) ligand 14	6.73026	9.38529
Cfa.17166.1.S1_at	PCK2	phosphoenolpyruvate carboxykinase 2 (mitochondrial)	7.07627	9.37699
CfaAffx.13603.1.S1_at	PDGFC	platelet derived growth factor C	9.80542	9.31949
CfaAffx.25468.1.S1_s_at	MYO1E	myosin IE	18.21	9.2911
CfaAffx.18161.1.S1_s_at	DHRS4	dehydrogenase/reductase (SDR family) member 4	21.0523	9.26605
CfaAffx.2699.1.S1_at	KIF20A	kinesin family member 20A	13.2775	9.25982
CfaAffx.1580.1.S1_s_at	MTHFD1L	methylenetetrahydrofolate dehydrogenase (NADP+ dependent) 1-like	3.14778	9.23624
Cfa.12090.1.A1_at	FOXM1	forkhead box M1	15.0793	9.19908
CfaAffx.16862.1.S1_at	SLC9B1	solute carrier family 9, subfamily B (NHA1, cation proton antiporter 1), member 1	7.16417	9.18675
Cfa.11488.1.A1_at	SERPINB5	serpin peptidase inhibitor, clade B (ovalbumin), member 5	8.86784	8.85091
Cfa.17158.1.S1_s_at	DBN1	drebrin 1	8.79541	8.80416
Cfa.17846.1.S1_s_at	FAM129A	family with sequence similarity 129, member A	12.7356	8.76946
CfaAffx.7845.1.S1_s_at	TSC22D1	TSC22 domain family, member 1	6.53128	8.731
Cfa.21551.1.S1_s_at	SCIN	scinderin	26.1641	8.56494
Cfa.4582.1.A1_at	HMGB3	high mobility group box 3	32.5163	8.40635
Cfa.33.1.S1_s_at	TPMT	thiopurine S-methyltransferase	4.67186	8.39531
CfaAffx.9762.1.S1_s_at	TMTC4	transmembrane and tetratricopeptide repeat containing 4	8.53674	8.36243
Cfa.9276.1.A1_at	CIT	citron (rho-interacting, serine/threonine kinase 21)	8.29581	8.33702
Cfa.19346.1.S1_s_at	TSPAN7	tetraspanin 7	8.40128	8.30235
CfaAffx.18911.1.S1_at	CA5B	carbonic anhydrase VB, mitochondrial	8.74415	8.29683
CfaAffx.18467.1.S1_s_at	PCK2	phosphoenolpyruvate carboxykinase 2 (mitochondrial)	8.30261	8.29466
CfaAffx.18433.1.S1_at	SPC25	SPC25, NDC80 kinetochore complex component	7.67086	8.27854
Cfa.103.1.A1_s_at	ASPM	asp (abnormal spindle) homolog, microcephaly associated (Drosophila)	13.7905	8.27159
Cfa.20835.1.S1_s_at	BCAT2	branched chain amino-acid transaminase 2, mitochondrial	9.1842	8.26518
Cfa.231.1.A1_at	CDCA2	cell division cycle associated 2	9.78331	8.21414
CfaAffx.13263.1.S1_at	RACGAP1	Rac GTPase activating protein 1	15.4753	8.12597
CfaAffx.26513.1.S1_at	FLRT2	fibronectin leucine rich transmembrane protein 2	8.10069	8.10069
CfaAffx.14710.1.S1_at	BPHL	biphenyl hydrolase-like (serine hydrolase)	13.7291	8.09721
Cfa.18211.1.A1_at	EFCAB11	EF-hand calcium binding domain 11	41.8185	8.09383
Cfa.651.1.S1_at	BCAR3	breast cancer anti-estrogen resistance 3	7.22777	7.97637
Cfa.698.5.A1_at	FTH1	ferritin, heavy polypeptide 1	21.7968	7.96021
CfaAffx.25383.1.S1_at	DCTPP1	dCTP pyrophosphatase 1	5.57983	7.95812
Cfa.3066.1.S1_at	NDC80	NDC80 kinetochore complex component	4.38551	7.9353
Cfa.18283.1.S1_s_at	IARS	isoleucyl-tRNA synthetase	3.94621	7.93426
Cfa.19423.1.S1_s_at	L3HYPDH	L-3-hydroxyproline dehydratase (trans-)	7.14024	7.89586
Cfa.9590.1.A1_at	COQ10A	coenzyme Q10 homolog A (S. cerevisiae)	4.87204	7.89225
CfaAffx.24692.1.S1_at	TOP2A	topoisomerase (DNA) II alpha 170kDa	16.1958	7.83545
Cfa.1562.1.A1_at	CHSY3	chondroitin sulfate synthase 3	8.44634	7.78712
CfaAffx.13518.1.S1_s_at	NUSAP1	nucleolar and spindle associated protein 1	4.3595	7.7674
Cfa.20703.1.S1_s_at	ZYX	zyxin	2.33002	7.7528
CfaAffx.30194.1.S1_at	WDR77	WD repeat domain 77	3.18722	7.74855
CfaAffx.23941.1.S1_s_at	RHNO1	RAD9-HUS1-RAD1 interacting nuclear orphan 1	9.73941	7.70777
Cfa.19323.1.S1_s_at	FLT1	fms-related tyrosine kinase 1 (vascular endothelial growth factor/vascular permeability factor receptor)	20.1348	7.69834
Cfa.11972.1.A1_at	UBE3D	ubiquitin protein ligase E3D	3.83846	7.69661
CfaAffx.23580.1.S1_at	RAD51AP1	RAD51 associated protein 1	8.16262	7.68155
Cfa.13834.1.A1_s_at	GPC4	glypican 4	8.00606	7.64527
Cfa.1437.2.A1_x_at	CDC6	cell division cycle 6	48.8489	7.58559
CfaAffx.30818.1.S1_s_at	BCAR3	breast cancer anti-estrogen resistance 3	5.57822	7.52729
CfaAffx.25205.1.S1_s_at	LOC476070	mitotic spindle assembly checkpoint protein MAD2A-like	24.7109	7.52474
Cfa.17599.1.S1_s_at	AP2A2	adaptor-related protein complex 2, alpha 2 subunit	7.20914	7.49177
Cfa.13363.1.A1_at	LOC102156419	uncharacterized LOC102156419	9.44544	7.48242
CfaAffx.8309.1.S1_s_at	DIAPH3	diaphanous-related formin 3	7.4758	7.4758
CfaAffx.14834.1.S1_at	CCNE2	cyclin E2	13.2486	7.46877
Cfa.7402.1.A1_s_at	C27H12orf10	chromosome 27 open reading frame, human C12orf10	7.1458	7.45376
Cfa.21151.1.S1_at	SCD	stearoyl-CoA desaturase (delta-9-desaturase)	3.7757	7.44984
CfaAffx.23606.1.S1_at	C27H12orf5	chromosome 27 open reading frame, human C12orf5	15.2719	7.43974
CfaAffx.4364.1.S1_s_at	MELK	maternal embryonic leucine zipper kinase	5.92813	7.39747
Cfa.11379.1.A1_at	ORC6	origin recognition complex, subunit 6	23.6828	7.38295
CfaAffx.790.1.S1_at	LOC607874	cystatin-C-like	2.85034	7.31649
CfaAffx.10677.1.S1_at	RRP8	ribosomal RNA processing 8, methyltransferase, homolog (yeast)	9.42817	7.29524
Cfa.19780.1.S1_s_at	MYO1E	myosin IE	18.8608	7.2922
CfaAffx.30650.1.S1_s_at	PHYHD1	phytanoyl-CoA dioxygenase domain containing 1	7.24191	7.26438
Cfa.18790.1.S1_s_at	GALM	galactose mutarotase (aldose 1-epimerase)	8.69164	7.25159
Cfa.1437.2.A1_at	CDC6	cell division cycle 6	37.2923	7.23921
Cfa.349.1.A1_s_at	DST	dystonin	9.55363	7.23823
CfaAffx.7416.1.S1_at	EBPL	emopamil binding protein-like	12.7452	7.23305
Cfa.8362.1.A1_s_at	WDR11	WD repeat domain 11	7.49779	7.21076
CfaAffx.29279.1.S1_at	MATK	megakaryocyte-associated tyrosine kinase	5.02092	7.16931
Cfa.19384.1.S1_at	PTRH1	peptidyl-tRNA hydrolase 1 homolog (S. cerevisiae)	10.1475	7.16309
Cfa.1476.1.A1_at	NCAPG	non-SMC condensin I complex, subunit G	32.3711	7.0956
Cfa.33.1.S1_at	TPMT	thiopurine S-methyltransferase	3.66441	7.08295
CfaAffx.20841.1.S1_at	FAM129A	family with sequence similarity 129, member A	6.87115	7.03278
CfaAffx.8850.1.S1_s_at	CDC20	cell division cycle 20	9.36654	6.97624
Cfa.18626.1.S1_s_at	SLC43A3	solute carrier family 43, member 3	18.9476	6.96604
Cfa.15300.1.A1_at	SETD7	SET domain containing (lysine methyltransferase) 7	4.44554	6.96565
CfaAffx.22478.1.S1_s_at	CDC45	cell division cycle 45	8.65731	6.96036
Cfa.322.1.S1_s_at	TPX2	TPX2, microtubule-associated	7.87936	6.93435
Cfa.9868.1.A1_at	BRCA2	breast cancer 2, early onset	6.94165	6.91923
Cfa.15460.1.A1_at	CENPP	centromere protein P	3.70807	6.84121
CfaAffx.16935.1.S1_at	TRIP13	thyroid hormone receptor interactor 13	6.89522	6.83034
Cfa.13410.1.A1_at	ASGR2	asialoglycoprotein receptor 2	6.79786	6.79786
CfaAffx.13863.1.S1_s_at	ATP6V0D2	ATPase, H+ transporting, lysosomal 38kDa, V0 subunit d2	6.76675	6.76072
Cfa.14245.1.A1_s_at	GPR110	G protein-coupled receptor 110	4.58572	6.74404
CfaAffx.8177.1.S1_at	SLC5A6	solute carrier family 5 (sodium/multivitamin and iodide cotransporter), member 6	17.3126	6.71559
CfaAffx.16862.1.S1_s_at	SLC9B1	solute carrier family 9, subfamily B (NHA1, cation proton antiporter 1), member 1	7.36612	6.70567
Cfa.19571.1.S1_s_at	NUSAP1	nucleolar and spindle associated protein 1	8.19981	6.57692
CfaAffx.16943.1.S1_s_at	CENPE	centromere protein E, 312kDa	6.72057	6.54199
CfaAffx.16240.1.S1_s_at	ALDH5A1	aldehyde dehydrogenase 5 family, member A1	11.1963	6.53671
Cfa.2292.1.A1_at	KLF4	Kruppel-like factor 4 (gut)	3.70424	6.50603
CfaAffx.2299.1.S1_s_at	TTLL1	tubulin tyrosine ligase-like family, member 1	13.2798	6.49182
Cfa.10738.1.A1_a_at	RIBC1	RIB43A domain with coiled-coils 1	13.3536	6.47766
Cfa.13028.1.A1_at	E2F2	E2F transcription factor 2	7.00157	6.47277
CfaAffx.11953.1.S1_at	CENPK	centromere protein K	9.59575	6.46976
Cfa.3066.1.S1_s_at	NDC80	NDC80 kinetochore complex component	4.17586	6.37383
Cfa.448.1.S1_at	TTC8	tetratricopeptide repeat domain 8	14.6962	6.34617
CfaAffx.11791.1.S1_s_at	PARPBP	PARP1 binding protein	7.61015	6.34
CfaAffx.28792.1.S1_at	NFIA	nuclear factor I/A	2.5461	6.33602
Cfa.20160.1.S1_at	FANCD2 /// FANCD2OS	Fanconi anemia, complementation group D2 /// FANCD2 opposite strand	5.89261	6.32464
CfaAffx.5496.1.S1_at	CHN2	chimerin 2	6.97791	6.29287
CfaAffx.19841.1.S1_at	SCN2B	sodium channel, voltage-gated, type II, beta subunit	6.28617	6.28474
CfaAffx.12812.1.S1_at	AVEN	apoptosis, caspase activation inhibitor	7.38127	6.28473
CfaAffx.11580.1.S1_at	DEPDC1B	DEP domain containing 1B	6.25323	6.21784
Cfa.20354.1.S1_s_at	XPNPEP1	X-prolyl aminopeptidase (aminopeptidase P) 1, soluble	8.22579	6.17648
CfaAffx.12430.1.S1_at	CENPH	centromere protein H	8.47741	6.17168
Cfa.2696.1.S1_at	AUNIP	aurora kinase A and ninein interacting protein	6.55234	6.16336
CfaAffx.12444.1.S1_s_at	MLF1IP	MLF1 interacting protein	11.866	6.15922
CfaAffx.16568.1.S1_s_at	HYAL1	hyaluronoglucosaminidase 1	7.42736	6.13363
CfaAffx.7518.1.S1_at	ABHD12	abhydrolase domain containing 12	2.49299	6.12608
Cfa.5596.1.A1_at	FLVCR2	feline leukemia virus subgroup C cellular receptor family, member 2	3.94201	6.11073
Cfa.1126.1.S1_s_at	CASC5	cancer susceptibility candidate 5	8.18456	6.0865
CfaAffx.20006.1.S1_at	CDK1	cyclin-dependent kinase 1	5.67583	6.08494
Cfa.20118.1.S1_s_at	UHRF1BP1L	UHRF1 binding protein 1-like	10.6212	6.0604
CfaAffx.3725.1.S1_s_at	STEAP2	STEAP family member 2, metalloreductase	6.59489	6.03176
CfaAffx.16707.1.S1_s_at	IFRD2	interferon-related developmental regulator 2	2.10196	6.01123
CfaAffx.26190.1.S1_s_at	IFT43	intraflagellar transport 43 homolog (Chlamydomonas)	7.98234	5.99798
CfaAffx.11492.1.S1_s_at	TPX2	TPX2, microtubule-associated	8.8032	5.99713
Cfa.8942.1.A1_at	NDP	Norrie disease (pseudoglioma)	213.718	5.96037
Cfa.16997.1.S1_at	DUSP23	dual specificity phosphatase 23	7.56595	5.91935
CfaAffx.29843.1.S1_s_at	KCNAB2	potassium voltage-gated channel, shaker-related subfamily, beta member 2	3.05597	5.88661
Cfa.11418.1.A1_at	C1H9orf3	chromosome 1 open reading frame, human C9orf3	10.512	5.8498
CfaAffx.7212.1.S1_s_at	LOC476070	mitotic spindle assembly checkpoint protein MAD2A-like	22.4072	5.83843
Cfa.1437.1.S1_at	CDC6	cell division cycle 6	5.83952	5.83011
Cfa.344.1.A1_at	CCNE2	cyclin E2	6.65031	5.82932
Cfa.10217.1.A1_at	PCP4L1	Purkinje cell protein 4 like 1	4.48913	5.7603
Cfa.7323.1.A1_at	DZANK1	double zinc ribbon and ankyrin repeat domains 1	11.6018	5.75404
CfaAffx.12632.1.S1_at	SLC43A3	solute carrier family 43, member 3	10.7221	5.75289
CfaAffx.10536.1.S1_at	BRCA2	breast cancer 2, early onset	6.12883	5.7296
CfaAffx.2298.1.S1_at	TTLL1	tubulin tyrosine ligase-like family, member 1	11.5027	5.70006
CfaAffx.2381.1.S1_at	KIFC1	kinesin family member C1	6.68837	5.6972
CfaAffx.28220.1.S1_at	PEMT	phosphatidylethanolamine N-methyltransferase	8.49696	5.69099
Cfa.7759.1.A1_at	AP1S2	adaptor-related protein complex 1, sigma 2 subunit	8.53536	5.67816
Cfa.4549.1.A1_at	BIRC5	baculoviral IAP repeat containing 5	13.4997	5.65611
Cfa.12038.1.A1_at	IFT43	intraflagellar transport 43 homolog (Chlamydomonas)	5.86217	5.64967
CfaAffx.4317.1.S1_s_at	CENPP	centromere protein P	3.19569	5.64645
Cfa.3414.1.A1_at	MYBL2	v-myb avian myeloblastosis viral oncogene homolog-like 2	6.12699	5.64556
CfaAffx.13202.1.S1_at	HPS3	Hermansky-Pudlak syndrome 3	2.58278	5.63901
CfaAffx.8071.1.S1_at	MCM10	minichromosome maintenance complex component 10	11.9454	5.62416
Cfa.11769.1.A1_s_at	MORN2	MORN repeat containing 2	19.7863	5.61536
Cfa.9331.1.A1_at	PANK1	pantothenate kinase 1	8.35771	5.571
CfaAffx.5150.1.S1_at	SIGLEC5	sialic acid binding Ig-like lectin 5	7.44322	5.55741
CfaAffx.7221.1.S1_s_at	SLC1A5	solute carrier family 1 (neutral amino acid transporter), member 5	2.20908	5.53264
CfaAffx.19085.1.S1_at	BBS5 /// KLHL41	Bardet-Biedl syndrome 5 /// kelch-like family member 41	18.5401	5.51699
Cfa.7415.1.A1_at	KNSTRN	kinetochore-localized astrin/SPAG5 binding protein	10.3032	5.51532
CfaAffx.7099.1.S1_at	SESN3	sestrin 3	6.91428	5.50056
CfaAffx.6339.1.S1_at	ZMYM1	zinc finger, MYM-type 1	3.2861	5.43811
Cfa.18970.1.S1_at	CDCA7L	cell division cycle associated 7-like	3.26181	5.43794
Cfa.10704.1.S1_at	RHNO1	RAD9-HUS1-RAD1 interacting nuclear orphan 1	7.80038	5.41752
Cfa.18758.1.S1_s_at	C27H12orf5	chromosome 27 open reading frame, human C12orf5	11.7152	5.38542
CfaAffx.29216.1.S1_at	HMGB3	high mobility group box 3	5.39025	5.36664
CfaAffx.28601.1.S1_s_at	SPAG5	sperm associated antigen 5	7.13594	5.34903
CfaAffx.26814.1.S1_at	SPC24	SPC24, NDC80 kinetochore complex component	5.17507	5.34497
CfaAffx.14021.1.S1_at	MIS18A	MIS18 kinetochore protein homolog A (S. pombe)	5.88568	5.33993
Cfa.1126.1.S1_at	CASC5	cancer susceptibility candidate 5	7.16169	5.32908
Cfa.17821.1.S1_s_at	FAM129A	family with sequence similarity 129, member A	9.23043	5.30999
CfaAffx.1797.1.S1_s_at	TFB1M	transcription factor B1, mitochondrial	4.0714	5.29914
CfaAffx.12575.1.S1_at	KNTC1	kinetochore associated 1	5.12766	5.2969
CfaAffx.30637.1.S1_at	CENPN	centromere protein N	5.50566	5.2537
CfaAffx.28162.1.S1_at	NDC80	NDC80 kinetochore complex component	8.10349	5.233
Cfa.10960.2.A1_a_at	CDK2AP1	cyclin-dependent kinase 2 associated protein 1	6.33825	5.19365
CfaAffx.15029.1.S1_at	TSPAN4	tetraspanin 4	10.656	5.18018
Cfa.17414.1.S1_at	CBX5	chromobox homolog 5	2.67175	5.17242
Cfa.20342.1.S1_at	MECOM	MDS1 and EVI1 complex locus	5.16205	5.16205
CfaAffx.6790.1.S1_at	BCAT2	branched chain amino-acid transaminase 2, mitochondrial	8.21881	5.15922
CfaAffx.10117.1.S1_s_at	CARS2	cysteinyl-tRNA synthetase 2, mitochondrial (putative)	6.46162	5.1549
Cfa.7110.1.A1_s_at	NDUFAF2	NADH dehydrogenase (ubiquinone) complex I, assembly factor 2	3.71338	5.11957
CfaAffx.6465.1.S1_at	ORC6	origin recognition complex, subunit 6	18.8112	5.11952
CfaAffx.6465.1.S1_s_at	ORC6	origin recognition complex, subunit 6	14.5972	5.11892
Cfa.4324.1.S1_at	ADAM15	ADAM metallopeptidase domain 15	5.18828	5.10465
CfaAffx.15860.1.S1_s_at	PSPH	phosphoserine phosphatase	13.6456	5.09508
CfaAffx.18467.1.S1_at	PCK2	phosphoenolpyruvate carboxykinase 2 (mitochondrial)	5.08576	5.08444
Cfa.11382.1.A1_s_at	ACSF2	acyl-CoA synthetase family member 2	33.3473	5.07758
CfaAffx.30432.1.S1_s_at	GPSM2	G-protein signaling modulator 2	7.20719	5.06415
CfaAffx.17010.1.S1_s_at	ABCA8	ATP-binding cassette, sub-family A (ABC1), member 8	8.09407	5.05357
CfaAffx.18023.1.S1_at	ARHGAP6	Rho GTPase activating protein 6	5.02558	5.01726
Cfa.12255.1.A1_at	ZNF77	zinc finger protein 77	3.07359	5.01043
CfaAffx.14604.1.S1_s_at	LOC100856570 /// LOC487740	trifunctional purine biosynthetic protein adenosine-3-like /// trifunctional purine biosynthetic protein adenosine-3-like	5.20447	4.99217
CfaAffx.31038.1.S1_s_at	ODF2L	outer dense fiber of sperm tails 2-like	6.96093	4.9889
Cfa.20320.1.S1_at	ZMYM1	zinc finger, MYM-type 1	2.34728	4.95994
CfaAffx.6790.1.S1_s_at	BCAT2	branched chain amino-acid transaminase 2, mitochondrial	13.3524	4.93302
Cfa.11314.1.A1_at	TFB1M	transcription factor B1, mitochondrial	3.48739	4.92946
CfaAffx.14867.1.S1_at	E2F8	E2F transcription factor 8	5.14091	4.8863
Cfa.2165.1.S1_at	PKIB	protein kinase (cAMP-dependent, catalytic) inhibitor beta	13.3569	4.88489
CfaAffx.11656.1.S1_at	SKA3	spindle and kinetochore associated complex subunit 3	5.61736	4.83745
Cfa.19631.1.S1_at	PRC1	protein regulator of cytokinesis 1	4.82765	4.8266
CfaAffx.25509.1.S1_at	NCAPG	non-SMC condensin I complex, subunit G	5.48669	4.81767
CfaAffx.19177.1.S1_at	WDR11	WD repeat domain 11	5.00878	4.81725
Cfa.1443.1.S1_s_at	SCHIP1	schwannomin interacting protein 1	13.1901	4.81621
CfaAffx.1052.1.S1_s_at	ITGA7	integrin, alpha 7	3.9196	4.81011
Cfa.8441.1.A1_at	KIF20A	kinesin family member 20A	6.50198	4.80165
Cfa.11547.1.A1_s_at	AVEN	apoptosis, caspase activation inhibitor	6.2441	4.78688
CfaAffx.22128.1.S1_at	S100P	S100 calcium binding protein P	8.36562	4.78373
Cfa.999.1.A1_at	GPSM2	G-protein signaling modulator 2	8.91533	4.77162
CfaAffx.11582.1.S1_s_at	MIPEP	mitochondrial intermediate peptidase	7.47985	4.76411
Cfa.3222.1.A1_at	ABHD12	abhydrolase domain containing 12	2.24421	4.76336
CfaAffx.16573.1.S1_s_at	FGD4	FYVE, RhoGEF and PH domain containing 4	2.56914	4.75784
Cfa.2065.1.A1_at	CTH	cystathionase (cystathionine gamma-lyase)	2.52878	4.7425
Cfa.299.1.A1_at	FABP3	fatty acid binding protein 3, muscle and heart (mammary-derived growth inhibitor)	3.97047	4.71538
Cfa.20663.1.A1_s_at	CDK1	cyclin-dependent kinase 1	4.82835	4.71077
Cfa.18206.1.S1_at	FAM136A	family with sequence similarity 136, member A	5.59946	4.70958
CfaAffx.3459.1.S1_at	MCM5	minichromosome maintenance complex component 5	7.06624	4.69697
CfaAffx.6497.1.S1_at	SETD7	SET domain containing (lysine methyltransferase) 7	4.37849	4.66327
CfaAffx.738.1.S1_x_at	GINS1	GINS complex subunit 1 (Psf1 homolog)	5.66715	4.65491
CfaAffx.9961.1.S1_at	BIVM	basic, immunoglobulin-like variable motif containing	9.44099	4.64529
CfaAffx.20862.1.S1_s_at	STYXL1	serine/threonine/tyrosine interacting-like 1	20.4266	4.63845
Cfa.14621.3.A1_s_at	FLNA	filamin A, alpha	2.31451	4.63387
Cfa.9894.1.A1_at	PFDN6	prefoldin subunit 6	6.19836	4.62786
Cfa.5348.1.A1_at	LOC102156100	uncharacterized LOC102156100	3.22138	4.62032
CfaAffx.25509.1.S1_s_at	NCAPG	non-SMC condensin I complex, subunit G	6.26576	4.61677
CfaAffx.31154.1.S1_at	CENPT /// RANBP10	centromere protein T /// RAN binding protein 10	5.23879	4.61336
Cfa.1725.1.S1_at	TMEM67	transmembrane protein 67	17.3013	4.61041
Cfa.20597.1.S1_s_at	KIF22	kinesin family member 22	5.88921	4.58791
Cfa.12612.1.A1_at	NUTF2	nuclear transport factor 2	2.29515	4.58762
Cfa.9009.1.A1_s_at	SACS	spastic ataxia of Charlevoix-Saguenay (sacsin)	2.22595	4.58106
CfaAffx.2004.1.S1_s_at	SLC27A6	solute carrier family 27 (fatty acid transporter), member 6	4.40312	4.54924
CfaAffx.23314.1.S1_s_at	C7H1orf112	chromosome 7 open reading frame, human C1orf112	3.2224	4.54219
CfaAffx.12692.1.S1_at	ARSK	arylsulfatase family, member K	24.4754	4.51885
Cfa.15054.1.A1_s_at	DST	dystonin	15.1238	4.51438
CfaAffx.3267.1.S1_s_at	PSAT1	phosphoserine aminotransferase 1	2.77266	4.51188
Cfa.21283.1.S1_at	DCTPP1	dCTP pyrophosphatase 1	2.97543	4.50916
Cfa.12674.1.A1_s_at	RYR1	ryanodine receptor 1 (skeletal)	2.77644	4.49622
CfaAffx.21714.1.S1_s_at	FANCM	Fanconi anemia, complementation group M	4.58101	4.4928
CfaAffx.21536.1.S1_at	TM7SF2	transmembrane 7 superfamily member 2	23.4847	4.48575
CfaAffx.13667.1.S1_at	TUBA1C	tubulin, alpha 1c	6.07808	4.48249
Cfa.10853.1.A1_at	PLCB1	phospholipase C, beta 1 (phosphoinositide-specific)	5.3011	4.4792
CfaAffx.25476.1.S1_s_at	LOC611720 /// NUDT6	nucleoside diphosphate-linked moiety X motif 6-like /// nudix (nucleoside diphosphate linked moiety X)-type motif 6	12.9491	4.47297
Cfa.5334.1.A1_s_at	LOC480601	regakine-1-like	2.37611	4.46694
CfaAffx.9044.1.S1_s_at	OSGEP	O-sialoglycoprotein endopeptidase	4.45959	4.46323
Cfa.16701.1.A1_s_at	TRAP1	TNF receptor-associated protein 1	3.08378	4.455
CfaAffx.18502.1.S1_at	AURKA	aurora kinase A	4.51099	4.45312
CfaAffx.20190.1.S1_at	EGR2	early growth response 2	8.75087	4.41545
CfaAffx.19534.1.S1_at	CENPF	centromere protein F, 350/400kDa (mitosin)	4.76533	4.41419
Cfa.18531.1.S1_s_at	IPO5	importin 5	2.72156	4.4037
CfaAffx.26488.1.S1_at	ZWILCH	Zwilch, kinetochore associated, homolog (Drosophila)	5.38884	4.40124
CfaAffx.23577.1.S1_s_at	ADK	adenosine kinase	2.35621	4.38887
Cfa.19174.1.S1_s_at	CD163	CD163 molecule	2.50961	4.37409
Cfa.3569.1.S1_at	SGSH	N-sulfoglucosamine sulfohydrolase	4.71843	4.36245
CfaAffx.5496.1.S1_s_at	CHN2	chimerin 2	4.58369	4.35602
CfaAffx.2495.1.S1_at	TIFAB	TRAF-interacting protein with forkhead-associated domain, family member B	2.08098	4.33815
Cfa.11070.1.A1_at	MIPEP	mitochondrial intermediate peptidase	4.88662	4.33738
Cfa.2861.1.S1_at	USP45	ubiquitin specific peptidase 45	2.14542	4.32383
CfaAffx.25068.1.S1_s_at	TBC1D19	TBC1 domain family, member 19	23.4002	4.32003
Cfa.15706.1.A1_at	ALDH7A1	aldehyde dehydrogenase 7 family, member A1	2.53738	4.3182
Cfa.7465.1.A1_at	RCC1	regulator of chromosome condensation 1	4.72124	4.31426
CfaAffx.25383.1.S1_s_at	DCTPP1	dCTP pyrophosphatase 1	3.04285	4.30926
CfaAffx.26219.1.S1_x_at	CKS1B	CDC28 protein kinase regulatory subunit 1B	7.52459	4.30026
Cfa.20950.1.S1_s_at	CPT2	carnitine palmitoyltransferase 2	2.54175	4.2898
Cfa.9405.1.A1_at	GOLM1	golgi membrane protein 1	3.72991	4.28851
Cfa.14069.1.A1_at	NACC2	NACC family member 2, BEN and BTB (POZ) domain containing	6.98085	4.28391
Cfa.557.1.A1_s_at	DST	dystonin	6.21578	4.27908
CfaAffx.22858.1.S1_s_at	FERMT2	fermitin family member 2	4.27408	4.27408
Cfa.11686.1.A1_at	NOC4L	nucleolar complex associated 4 homolog (S. cerevisiae)	2.63374	4.26103
CfaAffx.21717.1.S1_at	FANCM	Fanconi anemia, complementation group M	5.10829	4.23629
CfaAffx.12638.1.S1_at	CEP55	centrosomal protein 55kDa	4.40881	4.23279
CfaAffx.18992.1.S1_s_at	AP1S2	adaptor-related protein complex 1, sigma 2 subunit	4.08796	4.22869
Cfa.4099.1.A1_s_at	AP2A2	adaptor-related protein complex 2, alpha 2 subunit	2.66459	4.21982
CfaAffx.30649.1.S1_s_at	DYNLRB2	dynein, light chain, roadblock-type 2	21.1209	4.21931
CfaAffx.18759.1.S1_s_at	AP1B1	adaptor-related protein complex 1, beta 1 subunit	11.4494	4.21665
CfaAffx.13286.1.S1_at	ESCO2	establishment of sister chromatid cohesion N-acetyltransferase 2	4.36268	4.20897
CfaAffx.8399.1.S1_s_at	TSEN2	TSEN2 tRNA splicing endonuclease subunit	3.9292	4.20709
CfaAffx.6968.1.S1_at	EFCAB10 /// PUS7	EF-hand calcium-binding domain-containing protein 10-like /// pseudouridylate synthase 7 homolog (S. cerevisiae)	3.94882	4.19555
CfaAffx.26239.1.S1_at	ERCC6L	excision repair cross-complementing rodent repair deficiency, complementation group 6-like	5.89783	4.19466
CfaAffx.6533.1.S1_s_at	RTN4IP1	reticulon 4 interacting protein 1	3.28999	4.1881
Cfa.10634.1.A1_at	ITGA7	integrin, alpha 7	7.10905	4.17812
Cfa.411.1.A1_at	DHRS4	dehydrogenase/reductase (SDR family) member 4	20.3208	4.17638
Cfa.13501.1.S1_at	TPMT	thiopurine S-methyltransferase	6.07794	4.17552
CfaAffx.1546.1.S1_at	NUP43	nucleoporin 43kDa	2.78806	4.17406
Cfa.8946.1.A1_at	S100A10	S100 calcium binding protein A10	8.40908	4.16475
CfaAffx.12001.1.S1_s_at	MAN2A1	mannosidase, alpha, class 2A, member 1	3.32944	4.15451
CfaAffx.4891.1.S1_s_at	SMC2	structural maintenance of chromosomes 2	7.17445	4.1497
Cfa.8371.1.A1_at	CCNF	cyclin F	4.45026	4.09682
CfaAffx.2635.1.S1_at	BRD8 /// NME5	bromodomain containing 8 /// NME/NM23 family member 5	4.09891	4.09107
CfaAffx.19154.1.S1_at	BATF3	basic leucine zipper transcription factor, ATF-like 3	4.8622	4.08002
Cfa.17054.1.S1_at	LRPPRC	leucine-rich pentatricopeptide repeat containing	3.21808	4.07899
CfaAffx.9810.1.S1_at	CKAP2	cytoskeleton associated protein 2	2.2654	4.06247
CfaAffx.10818.1.S1_s_at	NCAPH	non-SMC condensin I complex, subunit H	8.35579	4.05784
Cfa.7484.1.A1_at	ISOC2	isochorismatase domain containing 2	4.17818	4.05592
Cfa.2609.1.S1_at	CHN2	chimerin 2	4.15078	4.05142
Cfa.9685.1.S1_at	TSC22D1	TSC22 domain family, member 1	4.58003	4.02504
Cfa.5885.1.S1_s_at	PAFAH1B3	platelet-activating factor acetylhydrolase 1b, catalytic subunit 3 (29kDa)	9.76755	4.02403
CfaAffx.830.1.S1_at	PPBP	pro-platelet basic protein (chemokine (C-X-C motif) ligand 7)	36.9211	4.01549
CfaAffx.18767.1.S1_at	PTPLB	protein tyrosine phosphatase-like (proline instead of catalytic arginine), member b	2.21617	4.00835
Cfa.20663.1.A1_at	CDK1	cyclin-dependent kinase 1	3.5159	4.0069
Cfa.19174.2.A1_at	LOC100684512	uncharacterized LOC100684512	2.24275	4.00184
Cfa.14178.1.S1_at	SLC5A6	solute carrier family 5 (sodium/multivitamin and iodide cotransporter), member 6	6.26582	3.97018
Cfa.2485.1.S1_s_at	C18H11orf48	chromosome 18 open reading frame, human C11orf48	3.75412	3.9557
CfaAffx.23870.1.S1_s_at	INTS4 /// LOC100684875	integrator complex subunit 4 /// integrator complex subunit 4-like	3.9759	3.95493
CfaAffx.14145.1.S1_at	CDCA2	cell division cycle associated 2	3.98072	3.94837
Cfa.12870.1.A1_s_at	MPZL1	myelin protein zero-like 1	6.0929	3.94061
Cfa.15826.1.S1_s_at	BIRC5	baculoviral IAP repeat containing 5	13.2072	3.92074
CfaAffx.21719.1.S1_s_at	FANCM	Fanconi anemia, complementation group M	4.59712	3.91758
CfaAffx.16434.1.S1_s_at	UBE2T	ubiquitin-conjugating enzyme E2T (putative)	13.5111	3.91206
CfaAffx.27461.1.S1_s_at	LOC479820	exonuclease NEF-sp	5.8981	3.88744
CfaAffx.23130.1.S1_at	NOP2	NOP2 nucleolar protein	2.01831	3.85574
CfaAffx.16579.1.S1_at	HYAL1	hyaluronoglucosaminidase 1	4.67315	3.84705
CfaAffx.20841.1.S1_s_at	FAM129A	family with sequence similarity 129, member A	4.44195	3.83493
Cfa.3271.1.S1_at	METTL5	methyltransferase like 5	2.10072	3.82712
Cfa.8074.1.A1_at	TRMT61A	tRNA methyltransferase 61 homolog A (S. cerevisiae)	3.9964	3.81949
Cfa.16512.1.S1_s_at	CDKN3	cyclin-dependent kinase inhibitor 3	7.35263	3.81402
Cfa.16355.1.S1_at	AURKB	aurora kinase B	5.18085	3.8017
CfaAffx.30769.1.S1_at	ALG14	ALG14, UDP-N-acetylglucosaminyltransferase subunit	6.33905	3.79622
Cfa.10400.1.A1_at	RCC1	regulator of chromosome condensation 1	2.99261	3.79499
CfaAffx.12913.1.S1_at	PINX1	PIN2/TERF1 interacting, telomerase inhibitor 1	2.10853	3.77723
Cfa.10545.2.S1_s_at	RPF2	ribosome production factor 2 homolog (S. cerevisiae)	3.89306	3.77557
Cfa.13049.1.A1_at	IPO4	importin 4	2.14995	3.77144
CfaAffx.23659.1.S1_at	MPZL1	myelin protein zero-like 1	14.9641	3.76994
Cfa.13472.1.A1_at	WDFY3	WD repeat and FYVE domain containing 3	4.17477	3.76855
CfaAffx.11999.1.S1_at	MAN2A1	mannosidase, alpha, class 2A, member 1	2.52594	3.75508
CfaAffx.738.1.S1_s_at	GINS1	GINS complex subunit 1 (Psf1 homolog)	4.79103	3.74724
Cfa.19638.1.S1_at	TMLHE	trimethyllysine hydroxylase, epsilon	3.74533	3.74533
Cfa.13138.1.A1_at	ACSS3	acyl-CoA synthetase short-chain family member 3	11.0339	3.73742
CfaAffx.20005.1.S1_at	METAP1D	methionyl aminopeptidase type 1D (mitochondrial)	3.58984	3.73005
Cfa.4592.1.S1_s_at	IMPDH2	IMP (inosine 5'-monophosphate) dehydrogenase 2	2.77345	3.72656
Cfa.3096.1.A1_at	NEIL3	nei endonuclease VIII-like 3 (E. coli)	5.03608	3.71189
Cfa.18874.1.S1_at	BCAT2	branched chain amino-acid transaminase 2, mitochondrial	9.24726	3.70006
Cfa.15550.1.A1_at	SLC43A3	solute carrier family 43, member 3	5.10721	3.6956
Cfa.2022.1.A1_at	MELK	maternal embryonic leucine zipper kinase	2.94093	3.68527
CfaAffx.18927.1.S1_s_at	CA5B	carbonic anhydrase VB, mitochondrial	3.68304	3.68246
Cfa.4397.1.A1_s_at	ABAT	4-aminobutyrate aminotransferase	2.98285	3.67769
Cfa.11448.1.A1_at	NUDT19	nudix (nucleoside diphosphate linked moiety X)-type motif 19	4.25378	3.67418
CfaAffx.18110.1.S1_at	MECR	mitochondrial trans-2-enoyl-CoA reductase	3.8667	3.67352
CfaAffx.21566.1.S1_s_at	CD163	CD163 molecule	2.11261	3.67108
Cfa.11334.1.A1_at	DYNLRB2	dynein, light chain, roadblock-type 2	19.7488	3.66562
CfaAffx.19088.1.S1_s_at	BBS5	Bardet-Biedl syndrome 5	9.91714	3.65154
CfaAffx.31060.1.S1_at	TTLL11	tubulin tyrosine ligase-like family, member 11	4.13121	3.65088
CfaAffx.9696.1.S1_at	TTC27	tetratricopeptide repeat domain 27	2.75275	3.64943
Cfa.17226.1.S1_at	SLC5A6	solute carrier family 5 (sodium/multivitamin and iodide cotransporter), member 6	4.76598	3.6473
Cfa.231.1.A1_s_at	CDCA2	cell division cycle associated 2	3.72096	3.63906
CfaAffx.16843.1.S1_s_at	LOC607054	cysteine and glycine-rich protein 1-like	10.0988	3.63636
Cfa.18010.1.S1_s_at	CHEK2	checkpoint kinase 2	3.6166	3.63205
Cfa.4725.1.S1_at	NDP	Norrie disease (pseudoglioma)	44.9618	3.62276
CfaAffx.17022.1.S1_at	ARRDC4	arrestin domain containing 4	15.2016	3.59613
CfaAffx.9778.1.S1_s_at	MAP4K1	mitogen-activated protein kinase kinase kinase kinase 1	2.2628	3.58878
Cfa.6332.1.A1_at	CARS2	cysteinyl-tRNA synthetase 2, mitochondrial (putative)	3.54405	3.58507
Cfa.12174.1.A1_at	PARS2	prolyl-tRNA synthetase 2, mitochondrial (putative)	3.21115	3.57479
Cfa.2485.1.S1_a_at	C18H11orf48	chromosome 18 open reading frame, human C11orf48	2.89772	3.56897
Cfa.5247.1.A1_at	RSAD1	radical S-adenosyl methionine domain containing 1	2.75124	3.56291
Cfa.9272.1.A1_at	GPX7	glutathione peroxidase 7	3.12508	3.56262
Cfa.4725.1.S1_s_at	NDP	Norrie disease (pseudoglioma)	14.7774	3.55502
Cfa.16355.1.S1_s_at	AURKB	aurora kinase B	6.00979	3.55466
Cfa.21281.1.S1_s_at	MRPL4	mitochondrial ribosomal protein L4	4.83842	3.5414
Cfa.21299.1.S1_s_at	APEX1	APEX nuclease (multifunctional DNA repair enzyme) 1	5.79634	3.53753
CfaAffx.8901.1.S1_s_at	TIE1	tyrosine kinase with immunoglobulin-like and EGF-like domains 1	3.63579	3.53729
Cfa.20246.1.S1_at	ACACA	acetyl-CoA carboxylase alpha	3.38374	3.53064
CfaAffx.27357.1.S1_at	MRPL4	mitochondrial ribosomal protein L4	4.16217	3.52998
Cfa.21627.1.S1_s_at	MTHFD1	methylenetetrahydrofolate dehydrogenase (NADP+ dependent) 1, methenyltetrahydrofolate cyclohydrolase, formyltetrahydrofolate synthetase	8.32775	3.52908
CfaAffx.16008.1.S1_at	KIF18A	kinesin family member 18A	4.87296	3.52901
Cfa.18146.1.S1_s_at	HEATR3	HEAT repeat containing 3	2.08815	3.52728
Cfa.11057.1.A1_s_at	MRPS15	mitochondrial ribosomal protein S15	5.18347	3.52334
Cfa.8202.1.A1_s_at	MIPEP	mitochondrial intermediate peptidase	5.47761	3.52149
Cfa.20856.1.S1_at	DAP	death-associated protein	2.11176	3.51634
Cfa.19148.1.S1_s_at	RRM1	ribonucleotide reductase M1	7.08645	3.51427
Cfa.8442.1.A1_at	ASRGL1	asparaginase like 1	2.58999	3.50142
Cfa.11154.1.A1_at	MRRF	mitochondrial ribosome recycling factor	2.85863	3.49953
Cfa.18471.1.S1_at	BLOC1S5	biogenesis of lysosomal organelles complex-1, subunit 5, muted	4.63725	3.49872
Cfa.2699.1.A1_at	GFPT1	glutamine--fructose-6-phosphate transaminase 1	7.45945	3.48833
CfaAffx.9018.1.S1_s_at	PITRM1	pitrilysin metallopeptidase 1	3.6791	3.47352
Cfa.11011.1.A1_at	MAOA	monoamine oxidase A	2.03533	3.46285
Cfa.15390.1.A1_at	SETD7	SET domain containing (lysine methyltransferase) 7	2.8243	3.46182
Cfa.20624.1.S1_at	FES	feline sarcoma oncogene	2.1296	3.4611
CfaAffx.8229.1.S1_s_at	INTS4	integrator complex subunit 4	2.75218	3.45856
CfaAffx.25068.1.S1_at	TBC1D19	TBC1 domain family, member 19	8.34759	3.44707
CfaAffx.4366.1.S1_s_at	IARS	isoleucyl-tRNA synthetase	2.13877	3.44284
Cfa.12870.1.A1_at	MPZL1	myelin protein zero-like 1	16.9575	3.43517
CfaAffx.6890.1.S1_at	PIK3CG	phosphatidylinositol-4,5-bisphosphate 3-kinase, catalytic subunit gamma	8.61491	3.42816
Cfa.1186.1.A1_a_at	CCDC30	coiled-coil domain containing 30	5.20425	3.42118
CfaAffx.17580.1.S1_at	B3GALNT2	beta-1,3-N-acetylgalactosaminyltransferase 2	4.36701	3.41335
CfaAffx.8304.1.S1_at	DIAPH3	diaphanous-related formin 3	3.43497	3.40946
CfaAffx.7369.1.S1_s_at	FGL2	fibrinogen-like 2	2.29254	3.40541
Cfa.7110.1.A1_at	NDUFAF2	NADH dehydrogenase (ubiquinone) complex I, assembly factor 2	2.69078	3.39891
CfaAffx.2023.1.S1_s_at	LYRM7	LYR motif containing 7	7.59598	3.39498
CfaAffx.27041.1.S1_s_at	QTRT1	queuine tRNA-ribosyltransferase 1	3.178	3.38891
CfaAffx.20340.1.S1_at	DTD2	D-tyrosyl-tRNA deacylase 2 (putative)	3.07359	3.38367
Cfa.3213.1.A1_at	PAK1	p21 protein (Cdc42/Rac)-activated kinase 1	2.28121	3.38324
CfaAffx.19129.1.S1_s_at	FES	feline sarcoma oncogene	2.13434	3.3655
CfaAffx.30639.1.S1_s_at	CENPN	centromere protein N	3.82242	3.36504
CfaAffx.3383.1.S1_at	GCNT1	glucosaminyl (N-acetyl) transferase 1, core 2	4.2292	3.36077
Cfa.15408.1.A1_at	GTPBP8	GTP-binding protein 8 (putative)	3.1689	3.35413
Cfa.6016.1.A1_at	SOX12	SRY (sex determining region Y)-box 12	2.14888	3.3498
Cfa.13910.1.A1_at	TCHP	trichoplein, keratin filament binding	5.08098	3.34352
Cfa.15408.1.A1_s_at	GTPBP8	GTP-binding protein 8 (putative)	2.74159	3.34283
Cfa.4099.1.A1_at	AP2A2	adaptor-related protein complex 2, alpha 2 subunit	2.20681	3.34106
Cfa.8940.1.A1_s_at	COQ7	coenzyme Q7 homolog, ubiquinone (yeast)	15.5171	3.33969
Cfa.16871.1.S1_at	SLC27A6	solute carrier family 27 (fatty acid transporter), member 6	2.96726	3.33505
CfaAffx.16822.1.S1_s_at	NAV1	neuron navigator 1	3.93648	3.33503
CfaAffx.18505.1.S1_at	KIAA1598	KIAA1598 ortholog	2.14412	3.32961
Cfa.5556.1.A1_s_at	TYMS	thymidylate synthetase	3.47006	3.32803
Cfa.7617.1.S1_at	LOC100688029	uncharacterized LOC100688029	2.60652	3.32771
CfaAffx.27325.1.S1_at	SLC39A6	solute carrier family 39 (zinc transporter), member 6	2.14039	3.3271
Cfa.11912.1.A1_at	WDR77	WD repeat domain 77	2.12291	3.32366
CfaAffx.12538.1.S1_s_at	MYOF	myoferlin	3.79433	3.32212
Cfa.9947.1.A1_at	BMP2K	BMP2 inducible kinase	4.40712	3.3205
CfaAffx.13079.1.S1_s_at	ARHGAP11A	Rho GTPase activating protein 11A	3.64433	3.319
CfaAffx.10129.1.S1_at	PPAPDC1B	phosphatidic acid phosphatase type 2 domain containing 1B	3.19728	3.31736
CfaAffx.4705.1.S1_at	CCDC106	coiled-coil domain containing 106	3.3176	3.31687
Cfa.3083.1.S1_at	TTC27	tetratricopeptide repeat domain 27	2.37779	3.31625
Cfa.18685.1.S1_s_at	MTHFD1	methylenetetrahydrofolate dehydrogenase (NADP+ dependent) 1, methenyltetrahydrofolate cyclohydrolase, formyltetrahydrofolate synthetase	6.23052	3.31215
CfaAffx.9696.1.S1_s_at	TTC27	tetratricopeptide repeat domain 27	2.60518	3.3072
Cfa.6825.1.A1_at	ENOPH1	enolase-phosphatase 1	2.91773	3.29671
Cfa.14379.1.A1_s_at	SPATA24	spermatogenesis associated 24	2.15175	3.29557
Cfa.618.1.A1_at	NIT2	nitrilase family, member 2	2.69628	3.29265
Cfa.18175.1.S1_at	GINS1	GINS complex subunit 1 (Psf1 homolog)	3.98382	3.29224
Cfa.17944.1.S1_s_at	WRB	tryptophan rich basic protein	5.14735	3.29112
Cfa.11745.1.A1_s_at	EEF1E1	eukaryotic translation elongation factor 1 epsilon 1	4.82964	3.28651
Cfa.10486.1.A1_at	NCAPH	non-SMC condensin I complex, subunit H	7.55084	3.28282
CfaAffx.28075.1.S1_at	TYMS	thymidylate synthetase	5.27112	3.2805
CfaAffx.3089.1.S1_s_at	CEP41	centrosomal protein 41kDa	3.21543	3.27936
Cfa.17281.1.S1_s_at	POLR1E	polymerase (RNA) I polypeptide E, 53kDa	3.21628	3.27817
Cfa.21474.1.S1_s_at	WDR46	WD repeat domain 46	3.33137	3.26675
CfaAffx.29256.1.S1_s_at	NSDHL	NAD(P) dependent steroid dehydrogenase-like	4.98386	3.25959
Cfa.18491.1.S1_s_at	ADSL /// TNRC6B	adenylosuccinate lyase /// trinucleotide repeat containing 6B	2.17301	3.25953
CfaAffx.22757.1.S1_s_at	MCM7	minichromosome maintenance complex component 7	2.15596	3.25432
CfaAffx.24412.1.S1_at	DYX1C1	dyslexia susceptibility 1 candidate 1	3.25422	3.25065
Cfa.3887.1.S1_s_at	FXYD1	FXYD domain containing ion transport regulator 1	3.34891	3.23863
Cfa.10365.1.A1_at	NDC1	NDC1 transmembrane nucleoporin	3.84278	3.22417
Cfa.16913.1.S1_s_at	PRADC1	protease-associated domain containing 1	4.45942	3.21735
Cfa.403.1.A1_s_at	ALDH7A1	aldehyde dehydrogenase 7 family, member A1	4.20838	3.20826
CfaAffx.30657.1.S1_at	CCBL1	cysteine conjugate-beta lyase, cytoplasmic	5.8369	3.20543
CfaAffx.29995.1.S1_at	FAM173A	family with sequence similarity 173, member A	10.6898	3.2026
Cfa.4587.1.A1_at	HK1	hexokinase 1	4.60125	3.20098
CfaAffx.14126.1.S1_s_at	C18H11orf49	chromosome 18 open reading frame, human C11orf49	3.09157	3.19525
CfaAffx.11943.1.S1_at	RPP14	ribonuclease P/MRP 14kDa subunit	2.78735	3.19354
CfaAffx.1496.1.S1_s_at	ALDH7A1	aldehyde dehydrogenase 7 family, member A1	4.36865	3.17984
Cfa.17863.2.S1_s_at	HMGCS1	3-hydroxy-3-methylglutaryl-CoA synthase 1 (soluble)	23.4396	3.17599
CfaAffx.24054.1.S1_s_at	KAT2A	K(lysine) acetyltransferase 2A	3.15085	3.17425
CfaAffx.13984.1.S1_s_at	TIAM1	T-cell lymphoma invasion and metastasis 1	4.5684	3.1694
CfaAffx.18623.1.S1_s_at	RPA2	replication protein A2, 32kDa	2.00772	3.16895
Cfa.8641.1.A1_at	PTPLB	protein tyrosine phosphatase-like (proline instead of catalytic arginine), member b	2.20598	3.16795
CfaAffx.27041.1.S1_at	QTRT1	queuine tRNA-ribosyltransferase 1	3.46361	3.16637
CfaAffx.8435.1.S1_at	EXOSC5	exosome component 5	3.41506	3.16408
CfaAffx.9171.1.S1_s_at	ARHGEF40	Rho guanine nucleotide exchange factor (GEF) 40	3.23379	3.15803
CfaAffx.8229.1.S1_at	INTS4	integrator complex subunit 4	2.49013	3.13757
CfaAffx.23821.1.S1_s_at	WDR74	WD repeat domain 74	2.56971	3.1246
CfaAffx.1747.1.S1_at	FBXO5	F-box protein 5	3.66548	3.11506
CfaAffx.9761.1.S1_at	RASGRP3	RAS guanyl releasing protein 3 (calcium and DAG-regulated)	2.3781	3.11405
CfaAffx.4684.1.S1_at	PREPL	prolyl endopeptidase-like	3.8911	3.1109
Cfa.4343.1.S1_s_at	MCM5	minichromosome maintenance complex component 5	4.42587	3.10391
Cfa.557.1.A2_at	DST	dystonin	9.79069	3.09905
Cfa.19945.1.S1_at	SCD5	stearoyl-CoA desaturase 5	3.29209	3.09884
Cfa.17400.1.S1_s_at	STYXL1	serine/threonine/tyrosine interacting-like 1	12.3931	3.09762
Cfa.20180.1.S1_s_at	LOC609615	one cut domain family member 3-like	5.87127	3.09149
CfaAffx.13625.1.S1_at	DSN1	DSN1, MIS12 kinetochore complex component	4.81484	3.09111
Cfa.546.1.A1_at	PHYHD1	phytanoyl-CoA dioxygenase domain containing 1	2.37944	3.08096
Cfa.5301.1.S1_at	TIE1	tyrosine kinase with immunoglobulin-like and EGF-like domains 1	13.3907	3.08058
CfaAffx.4498.1.S1_s_at	ISPD	isoprenoid synthase domain containing	3.32517	3.07132
Cfa.21097.1.S1_s_at	ACOX1	acyl-CoA oxidase 1, palmitoyl	3.74693	3.06575
CfaAffx.12367.1.S1_at	MFAP3L	microfibrillar-associated protein 3-like	3.04932	3.06559
Cfa.16407.1.A1_at	DCK	deoxycytidine kinase	5.87225	3.05482
CfaAffx.9050.1.S1_s_at	APEX1	APEX nuclease (multifunctional DNA repair enzyme) 1	4.30889	3.04846
Cfa.11599.1.A1_at	SORT1	sortilin 1	6.64555	3.04651
Cfa.9667.1.A1_at	SH3KBP1	SH3-domain kinase binding protein 1	2.08541	3.0426
Cfa.9733.1.A1_at	WDR77	WD repeat domain 77	2.18906	3.03514
Cfa.16913.2.S1_at	PRADC1	protease-associated domain containing 1	5.19494	3.03379
CfaAffx.21220.1.S1_at	SPATA5L1	spermatogenesis associated 5-like 1	2.09043	3.02963
Cfa.11745.1.A1_at	EEF1E1	eukaryotic translation elongation factor 1 epsilon 1	4.42253	3.0259
CfaAffx.27455.1.S1_s_at	LOC479820	exonuclease NEF-sp	5.41329	3.02467
Cfa.904.1.A1_at	AKAP1	A kinase (PRKA) anchor protein 1	2.52625	3.0181
CfaAffx.16676.1.S1_at	HYAL3 /// IFRD2	hyaluronoglucosaminidase 3 /// interferon-related developmental regulator 2	3.69329	3.01691
CfaAffx.21536.1.S1_s_at	TM7SF2	transmembrane 7 superfamily member 2	7.23022	3.00812
Cfa.12095.1.A1_at	INTS4	integrator complex subunit 4	2.30454	3.00414
CfaAffx.28332.1.S1_s_at	KNOP1	lysine-rich nucleolar protein 1	3.45656	3.00334
Cfa.5557.1.A1_at	ATP11A	ATPase, class VI, type 11A	8.85686	2.99953
CfaAffx.31033.1.S1_s_at	ODF2L	outer dense fiber of sperm tails 2-like	3.62654	2.99845
CfaAffx.999.1.S1_at	GALR1	galanin receptor 1	2.98097	2.98097
CfaAffx.7886.1.S1_s_at	PLXND1	plexin D1	5.62208	2.97455
Cfa.15269.1.A1_at	WHSC1	Wolf-Hirschhorn syndrome candidate 1	18.2962	2.97453
Cfa.16390.1.S1_s_at	HMGCR	3-hydroxy-3-methylglutaryl-CoA reductase	8.40775	2.97357
CfaAffx.3410.1.S1_at	RBM28	RNA binding motif protein 28	2.50999	2.96516
Cfa.3561.1.S1_at	SLC3A1	solute carrier family 3 (cystine, dibasic and neutral amino acid transporters, activator of cystine, dibasic and neutral amino acid transport), member 1	2.08043	2.96251
Cfa.9126.2.S1_a_at	SPA17	sperm autoantigenic protein 17	38.1922	2.96055
Cfa.9076.1.A1_at	B9D2 /// TGFB1	B9 protein domain 2 /// transforming growth factor, beta 1	2.66914	2.95578
Cfa.3546.2.S1_s_at	CSDA	cold shock domain protein A	4.09935	2.95246
Cfa.9123.1.S1_at	MRPL51	mitochondrial ribosomal protein L51	5.37728	2.9508
Cfa.8202.1.A1_at	MIPEP	mitochondrial intermediate peptidase	4.26455	2.94948
Cfa.8919.1.A1_at	PDXP	pyridoxal (pyridoxine, vitamin B6) phosphatase	3.20896	2.94895
Cfa.9503.2.A1_at	C18H11orf83	chromosome 18 open reading frame, human C11orf83	2.58034	2.94561
CfaAffx.16051.1.S1_at	KIAA1524	KIAA1524 ortholog	2.27775	2.94279
CfaAffx.12393.1.S1_at	LPXN	leupaxin	2.09247	2.93865
Cfa.19990.1.S1_s_at	KNSTRN	kinetochore-localized astrin/SPAG5 binding protein	3.34624	2.93525
CfaAffx.19432.1.S1_at	ECE2	endothelin converting enzyme 2	5.11891	2.93157
Cfa.11867.1.A1_at	FAM129A	family with sequence similarity 129, member A	4.40522	2.9313
Cfa.5581.1.A1_at	NUP93	nucleoporin 93kDa	10.3834	2.92824
CfaAffx.4509.1.S1_s_at	DST	dystonin	8.20906	2.91602
CfaAffx.12916.1.S1_s_at	PINX1	PIN2/TERF1 interacting, telomerase inhibitor 1	2.29326	2.91223
Cfa.20105.1.S1_s_at	PRMT5	protein arginine methyltransferase 5	3.26296	2.90988
CfaAffx.16506.1.S1_at	GTPBP8	GTP-binding protein 8 (putative)	2.93038	2.90931
Cfa.15416.1.S1_at	LOC610164	carbonyl reductase [NADPH] 1-like	2.97394	2.90547
CfaAffx.9857.1.S1_s_at	YIF1B	Yip1 interacting factor homolog B (S. cerevisiae)	4.1233	2.89403
CfaAffx.26158.1.S1_at	FARSA	phenylalanyl-tRNA synthetase, alpha subunit	5.57282	2.89229
Cfa.8130.1.A1_at	ACACA	acetyl-CoA carboxylase alpha	2.42441	2.8909
Cfa.17187.1.S1_at	TOMM40	translocase of outer mitochondrial membrane 40 homolog (yeast)	2.41007	2.87711
Cfa.20919.2.A1_at	RPP30	ribonuclease P/MRP 30kDa subunit	2.51433	2.87233
Cfa.6856.1.S1_at	LEPREL4	leprecan-like 4	2.87087	2.87087
Cfa.403.1.A1_at	ALDH7A1	aldehyde dehydrogenase 7 family, member A1	3.9056	2.87037
CfaAffx.20800.1.S1_s_at	FASTKD2	FAST kinase domains 2	3.01318	2.8676
CfaAffx.28123.1.S1_at	SLC25A43	solute carrier family 25, member 43	10.7956	2.86522
Cfa.18708.1.S1_s_at	CCT5	chaperonin containing TCP1, subunit 5 (epsilon)	2.14496	2.86444
CfaAffx.13272.1.S1_s_at	ALDH18A1	aldehyde dehydrogenase 18 family, member A1	6.45167	2.85928
CfaAffx.23551.1.S1_at	BST1	bone marrow stromal cell antigen 1	7.30067	2.85768
CfaAffx.2338.1.S1_s_at	CYB5R3	cytochrome b5 reductase 3	7.93664	2.85757
Cfa.5855.1.A1_at	C18H11orf24	chromosome 18 open reading frame, human C11orf24	4.72824	2.85301
Cfa.20425.1.S1_at	CCNE1	cyclin E1	5.33434	2.85298
CfaAffx.19813.1.S1_s_at	FTSJ3	FtsJ homolog 3 (E. coli)	2.45636	2.85225
Cfa.13222.1.A1_at	ALDH7A1	aldehyde dehydrogenase 7 family, member A1	3.14854	2.85012
CfaAffx.30417.1.S1_s_at	PIEZO1	piezo-type mechanosensitive ion channel component 1	3.03222	2.84863
CfaAffx.12324.1.S1_at	FAM111A	family with sequence similarity 111, member A	2.55904	2.84086
Cfa.21171.1.S1_s_at	PRKAR2A	protein kinase, cAMP-dependent, regulatory, type II, alpha	3.39068	2.83884
CfaAffx.25997.1.S1_s_at	SPDL1	spindle apparatus coiled-coil protein 1	2.97696	2.83738
CfaAffx.19540.1.S1_at	CENPF	centromere protein F, 350/400kDa (mitosin)	2.83571	2.83498
CfaAffx.16707.1.S1_at	IFRD2	interferon-related developmental regulator 2	2.04637	2.82154
CfaAffx.11739.1.S1_s_at	PCCB	propionyl CoA carboxylase, beta polypeptide	3.45153	2.82117
CfaAffx.22183.1.S1_at	G6PC3	glucose 6 phosphatase, catalytic, 3	5.60125	2.82081
CfaAffx.25349.1.S1_s_at	LAS1L	LAS1-like (S. cerevisiae)	2.96204	2.81613
Cfa.4343.1.S1_at	MCM5	minichromosome maintenance complex component 5	2.95359	2.81375
CfaAffx.1324.1.S1_at	FAM54A	family with sequence similarity 54, member A	12.907	2.81323
Cfa.18918.1.S1_s_at	MAT2A	methionine adenosyltransferase II, alpha	2.61814	2.81295
CfaAffx.23366.1.S1_s_at	MRTO4	mRNA turnover 4 homolog (S. cerevisiae)	2.16747	2.81212
Cfa.11133.1.A1_at	EBPL	emopamil binding protein-like	4.28322	2.80643
Cfa.4911.1.A1_s_at	FARSB	phenylalanyl-tRNA synthetase, beta subunit	2.81496	2.80636
Cfa.1844.1.S1_at	LOC476070	mitotic spindle assembly checkpoint protein MAD2A-like	4.91606	2.8058
Cfa.14247.2.A1_a_at	OSGEP	O-sialoglycoprotein endopeptidase	3.06439	2.80423
Cfa.3530.1.A1_at	PHP	phospholipid hydroperoxide glutathione peroxidase	7.89722	2.79835
CfaAffx.20095.1.S1_at	NARF	nuclear prelamin A recognition factor	2.95791	2.79746
Cfa.9126.3.S1_a_at	SPA17	sperm autoantigenic protein 17	12.9271	2.79738
Cfa.10891.1.A1_at	TMEM218	transmembrane protein 218	2.64557	2.7971
CfaAffx.8367.1.S1_s_at	PAK1	p21 protein (Cdc42/Rac)-activated kinase 1	2.67581	2.79681
CfaAffx.6880.1.S1_s_at	DHFR /// LOC479165	dihydrofolate reductase /// dihydrofolate reductase-like	4.34595	2.78266
CfaAffx.7944.1.S1_at	ABHD1	abhydrolase domain containing 1	3.51132	2.7685
CfaAffx.26740.1.S1_s_at	TTC8	tetratricopeptide repeat domain 8	4.13014	2.76815
Cfa.10949.1.A1_s_at	IMP4	IMP4, U3 small nucleolar ribonucleoprotein, homolog (yeast)	3.81126	2.76751
CfaAffx.29151.1.S1_s_at	IDS	iduronate 2-sulfatase	10.5375	2.76567
Cfa.3335.1.A1_at	RBM28	RNA binding motif protein 28	2.08333	2.76408
Cfa.3200.1.S1_s_at	NACC2	NACC family member 2, BEN and BTB (POZ) domain containing	27.9098	2.76183
CfaAffx.6059.1.S1_at	RRM2	ribonucleotide reductase M2	77.3255	2.76101
Cfa.13749.1.A1_at	WDR11	WD repeat domain 11	2.47279	2.75924
Cfa.21309.1.S1_at	MRPS10	mitochondrial ribosomal protein S10	4.13266	2.75841
Cfa.18700.1.S1_s_at	AKR1A1	aldo-keto reductase family 1, member A1 (aldehyde reductase)	2.78287	2.75823
CfaAffx.3331.1.S1_at	DENND4C	DENN/MADD domain containing 4C	3.46537	2.75607
CfaAffx.10036.1.S1_at	SLC23A2	solute carrier family 23 (nucleobase transporters), member 2	5.29484	2.75302
Cfa.10800.1.A1_at	PCCB	propionyl CoA carboxylase, beta polypeptide	3.11054	2.75212
CfaAffx.14139.1.S1_at	SPR	sepiapterin reductase (7,8-dihydrobiopterin:NADP+ oxidoreductase)	5.0512	2.75095
CfaAffx.19714.1.S1_s_at	OAT	ornithine aminotransferase	2.8062	2.75042
CfaAffx.1145.1.S1_at	COQ10A	coenzyme Q10 homolog A (S. cerevisiae)	2.74469	2.75007
Cfa.10481.1.A1_at	C27H12orf5	chromosome 27 open reading frame, human C12orf5	4.34705	2.74943
Cfa.10170.1.A1_s_at	TUFM	Tu translation elongation factor, mitochondrial	2.72185	2.74333
Cfa.3200.1.S1_at	NACC2	NACC family member 2, BEN and BTB (POZ) domain containing	110.486	2.73917
CfaAffx.7811.1.S1_at	MMACHC	methylmalonic aciduria (cobalamin deficiency) cblC type, with homocystinuria	3.97129	2.73893
Cfa.18349.1.S1_at	METTL16	methyltransferase like 16	2.37873	2.72101
CfaAffx.9956.1.S1_s_at	KDELC1	KDEL (Lys-Asp-Glu-Leu) containing 1	11.4927	2.71945
Cfa.12037.1.A1_at	PPM1J	protein phosphatase, Mg2+/Mn2+ dependent, 1J	2.51233	2.71661
CfaAffx.17685.1.S1_s_at	LOC476006	glutathione S-transferase P-like	6.48632	2.70842
CfaAffx.16245.1.S1_s_at	ALDH5A1	aldehyde dehydrogenase 5 family, member A1	3.18053	2.70646
Cfa.14281.1.A1_at	HGSNAT	heparan-alpha-glucosaminide N-acetyltransferase	5.99105	2.69949
Cfa.13912.1.A1_at	RRM2	ribonucleotide reductase M2	131.028	2.6991
CfaAffx.11774.1.S1_at	HECTD2	HECT domain containing E3 ubiquitin protein ligase 2	3.44377	2.69739
Cfa.18144.1.S1_s_at	IARS	isoleucyl-tRNA synthetase	2.15654	2.69736
Cfa.10170.1.A1_at	TUFM	Tu translation elongation factor, mitochondrial	2.71585	2.69325
CfaAffx.4602.1.S1_at	TBC1D2	TBC1 domain family, member 2	2.9017	2.69232
Cfa.17944.1.S1_at	WRB	tryptophan rich basic protein	9.56806	2.69055
Cfa.1490.1.S1_at	TMEM17	transmembrane protein 17	14.5106	2.67529
CfaAffx.14735.1.S1_at	MYBL2	v-myb avian myeloblastosis viral oncogene homolog-like 2	2.6689	2.66678
Cfa.17113.1.S1_at	SCARB1	scavenger receptor class B, member 1	6.56622	2.66511
CfaAffx.11630.1.S1_s_at	POLR1B	polymerase (RNA) I polypeptide B, 128kDa	2.55462	2.66084
Cfa.1760.1.A1_at	MAN2A1	mannosidase, alpha, class 2A, member 1	2.02203	2.65305
Cfa.18415.1.S1_at	TMEM109	transmembrane protein 109	7.90911	2.65163
Cfa.6640.1.A1_at	MCAT	malonyl CoA:ACP acyltransferase (mitochondrial)	10.2439	2.62522
Cfa.15100.1.A1_at	SLC35G1	solute carrier family 35, member G1	3.3506	2.62365
CfaAffx.7190.1.S1_at	SAE1	SUMO1 activating enzyme subunit 1	2.31502	2.61492
Cfa.16763.1.S1_s_at	PHPT1	phosphohistidine phosphatase 1	4.82401	2.61071
CfaAffx.31158.1.S1_at	ENKD1	enkurin domain containing 1	2.91216	2.60721
Cfa.4290.1.A1_at	C10H12orf66	chromosome 10 open reading frame, human C12orf66	3.33384	2.60497
Cfa.20626.1.S1_at	POP4	processing of precursor 4, ribonuclease P/MRP subunit (S. cerevisiae)	3.24451	2.60221
CfaAffx.27290.1.S1_at	PIGW	phosphatidylinositol glycan anchor biosynthesis, class W	2.50931	2.59916
Cfa.3887.2.A1_s_at	FXYD1	FXYD domain containing ion transport regulator 1	3.74242	2.59685
Cfa.8748.1.A1_s_at	IFT57	intraflagellar transport 57 homolog (Chlamydomonas)	4.20468	2.5869
Cfa.20704.1.S1_at	UBE2T	ubiquitin-conjugating enzyme E2T (putative)	5.1633	2.58484
Cfa.15094.1.S1_at	LOC102156116 /// NME1 /// NME2	nucleoside diphosphate kinase A-like /// non-metastatic cells 1, protein (NM23A) expressed in /// non-metastatic cells 2, protein (NM23B) expressed in	2.6877	2.57893
Cfa.9049.1.A1_at	FXN	frataxin	2.6535	2.57586
CfaAffx.16699.1.S1_s_at	XPNPEP1	X-prolyl aminopeptidase (aminopeptidase P) 1, soluble	2.60873	2.57356
CfaAffx.29544.1.S1_s_at	ZNF77	zinc finger protein 77	2.37619	2.56593
CfaAffx.4146.1.S1_s_at	SLC25A13	solute carrier family 25 (aspartate/glutamate carrier), member 13	4.58734	2.56551
Cfa.10838.1.A1_at	WDFY3	WD repeat and FYVE domain containing 3	2.07557	2.56309
Cfa.5351.2.A1_at	PPAPDC1B	phosphatidic acid phosphatase type 2 domain containing 1B	2.41677	2.56275
Cfa.7711.1.A1_at	PAQR3	progestin and adipoQ receptor family member III	2.45299	2.56244
Cfa.7114.1.A1_at	PITRM1	pitrilysin metallopeptidase 1	2.11295	2.56205
CfaAffx.10977.1.S1_at	UHRF1BP1L	UHRF1 binding protein 1-like	6.74015	2.5595
Cfa.17136.1.S1_at	FASN	fatty acid synthase	2.45834	2.55872
Cfa.16144.1.S1_at	MACROD1	MACRO domain containing 1	5.41176	2.55597
CfaAffx.13990.1.S1_at	BMP2K	BMP2 inducible kinase	2.61868	2.55525
CfaAffx.14370.1.S1_at	KNSTRN	kinetochore-localized astrin/SPAG5 binding protein	3.108	2.55315
Cfa.11895.1.A1_at	FAM136A	family with sequence similarity 136, member A	2.3074	2.55152
CfaAffx.12901.1.S1_at	TBC1D12	TBC1 domain family, member 12	2.41321	2.54835
Cfa.3390.1.A1_at	AKAP1	A kinase (PRKA) anchor protein 1	2.32941	2.54447
Cfa.9056.1.A1_at	PRIM2	primase, DNA, polypeptide 2 (58kDa)	2.48091	2.54294
Cfa.15945.2.S1_s_at	ECHS1	enoyl CoA hydratase, short chain, 1, mitochondrial	2.47797	2.54268
Cfa.5995.1.A1_at	APOM	apolipoprotein M	2.91104	2.54169
CfaAffx.7785.1.S1_at	AKR1A1	aldo-keto reductase family 1, member A1 (aldehyde reductase)	2.52976	2.53865
CfaAffx.14162.1.S1_at	ENOPH1	enolase-phosphatase 1	2.23609	2.53663
Cfa.20585.1.A1_at	AP1S2	adaptor-related protein complex 1, sigma 2 subunit	2.09692	2.5344
Cfa.11260.1.A1_at	AP1S2	adaptor-related protein complex 1, sigma 2 subunit	2.57649	2.53286
CfaAffx.4678.1.S1_s_at	SLC3A1	solute carrier family 3 (cystine, dibasic and neutral amino acid transporters, activator of cystine, dibasic and neutral amino acid transport), member 1	2.19973	2.52699
Cfa.12943.1.A1_at	PSMD1	proteasome (prosome, macropain) 26S subunit, non-ATPase, 1	2.37684	2.52274
Cfa.20936.1.S1_s_at	MRPL37	mitochondrial ribosomal protein L37	2.58416	2.51967
Cfa.16763.1.S1_at	PHPT1	phosphohistidine phosphatase 1	4.57198	2.51927
CfaAffx.1478.1.S1_at	C10H12orf66	chromosome 10 open reading frame, human C12orf66	3.43963	2.51745
Cfa.10960.1.S1_at	CDK2AP1	cyclin-dependent kinase 2 associated protein 1	3.02808	2.51369
CfaAffx.8417.1.S1_s_at	ACOX1	acyl-CoA oxidase 1, palmitoyl	2.86658	2.51147
Cfa.9886.1.A1_at	PDGFC	platelet derived growth factor C	3.2592	2.50474
CfaAffx.31047.1.S1_at	MRRF	mitochondrial ribosome recycling factor	2.60803	2.50467
CfaAffx.25380.1.S1_s_at	CISD3	CDGSH iron sulfur domain 3	5.41176	2.50279
Cfa.19678.2.A1_at	TCF19	transcription factor 19	2.64601	2.50121
Cfa.11836.1.A1_at	RRP12	ribosomal RNA processing 12 homolog (S. cerevisiae)	3.33443	2.49137
CfaAffx.5470.1.S1_s_at	CPVL	carboxypeptidase, vitellogenic-like	2.40254	2.48903
Cfa.19149.1.A1_s_at	IMP4	IMP4, U3 small nucleolar ribonucleoprotein, homolog (yeast)	2.61725	2.48831
CfaAffx.20491.1.S1_at	SCRN3	secernin 3	3.55246	2.48046
CfaAffx.16002.1.S1_at	KCNQ1	potassium voltage-gated channel, KQT-like subfamily, member 1	2.10085	2.47927
CfaAffx.15578.1.S1_at	NPM3	nucleophosmin/nucleoplasmin 3	2.25621	2.47894
CfaAffx.30405.1.S1_s_at	CDT1	chromatin licensing and DNA replication factor 1	2.40568	2.47889
Cfa.8986.1.A1_s_at	CCDC62	coiled-coil domain containing 62	14.7719	2.47124
CfaAffx.4032.1.S1_at	ARHGEF39	Rho guanine nucleotide exchange factor (GEF) 39	2.59529	2.47117
CfaAffx.7682.1.S1_s_at	PICALM	phosphatidylinositol binding clathrin assembly protein	3.8278	2.46741
Cfa.7711.2.S1_at	BMP2K	BMP2 inducible kinase	2.56121	2.46712
Cfa.9069.1.A1_at	TBCE	tubulin folding cofactor E	2.3721	2.45858
Cfa.1156.1.A1_at	AKAP3	A kinase (PRKA) anchor protein 3	3.88302	2.45472
CfaAffx.9546.1.S1_at	GINS4	GINS complex subunit 4 (Sld5 homolog)	4.51594	2.45375
CfaAffx.12436.1.S1_s_at	GGCX	gamma-glutamyl carboxylase	2.19652	2.44827
Cfa.12532.1.A1_at	PTPN21	protein tyrosine phosphatase, non-receptor type 21	2.68002	2.44519
CfaAffx.11803.1.S1_s_at	PMCH	pro-melanin-concentrating hormone	2.49205	2.44122
Cfa.16264.1.S1_a_at	MRPL28	mitochondrial ribosomal protein L28	4.0624	2.43974
Cfa.5834.1.S1_at	ITGAV	integrin, alpha V	2.84416	2.43878
CfaAffx.7979.1.S1_at	SUV39H2	suppressor of variegation 3-9 homolog 2 (Drosophila)	4.97297	2.43706
CfaAffx.22915.1.S1_at	BCS1L	BCS1-like (S. cerevisiae)	6.37475	2.43607
Cfa.1832.1.A1_at	TIMM8A	translocase of inner mitochondrial membrane 8 homolog A (yeast)	2.26856	2.43455
Cfa.12033.1.A1_at	APEX1	APEX nuclease (multifunctional DNA repair enzyme) 1	2.79598	2.43371
Cfa.19742.1.S1_at	BST1	bone marrow stromal cell antigen 1	4.29808	2.42429
CfaAffx.5450.1.S1_s_at	PPT1	palmitoyl-protein thioesterase 1	3.77348	2.42342
CfaAffx.26219.1.S1_s_at	CKS1B /// FLAD1	CDC28 protein kinase regulatory subunit 1B /// flavin adenine dinucleotide synthetase 1	3.32559	2.42279
CfaAffx.20019.1.S1_s_at	METAP1D	methionyl aminopeptidase type 1D (mitochondrial)	2.41232	2.42207
CfaAffx.13990.1.S1_s_at	BMP2K	BMP2 inducible kinase	2.31026	2.4171
CfaAffx.3774.1.S1_at	FXN	frataxin	2.48391	2.41439
CfaAffx.140.1.S1_at	GEMIN4	gem (nuclear organelle) associated protein 4	2.08039	2.41049
Cfa.1587.1.A1_at	C4H5orf54	chromosome 4 open reading frame, human C5orf54	2.42658	2.40899
Cfa.15285.2.A1_a_at	LOC607054	cysteine and glycine-rich protein 1-like	4.81678	2.40885
Cfa.613.1.A1_at	RASGRP3	RAS guanyl releasing protein 3 (calcium and DAG-regulated)	2.071	2.4008
Cfa.20870.1.S1_at	CROT	carnitine O-octanoyltransferase	2.23247	2.3994
CfaAffx.2339.1.S1_at	WDR46	WD repeat domain 46	2.92293	2.39024
Cfa.9380.1.A1_at	TYMS	thymidylate synthetase	2.49279	2.38299
Cfa.9796.1.A1_at	FAM108C1	family with sequence similarity 108, member C1	2.5615	2.38204
Cfa.13231.1.A1_at	GSTM1	glutathione S-transferase mu 1	4.14558	2.38023
CfaAffx.11724.1.S1_s_at	CYB5A /// LOC611427	cytochrome b5 type A (microsomal) /// cytochrome b5-like	3.50727	2.37743
Cfa.12195.10.A1_at	ELAC2	elaC ribonuclease Z 2	2.28514	2.37677
CfaAffx.18523.1.S1_s_at	CHEK2	checkpoint kinase 2	2.08993	2.37521
CfaAffx.16277.1.S1_s_at	ST3GAL4	ST3 beta-galactoside alpha-2,3-sialyltransferase 4	2.98317	2.36904
Cfa.18109.1.S1_s_at	SEC24D	SEC24 family, member D (S. cerevisiae)	2.37764	2.36742
Cfa.8463.1.A1_at	C9H9orf117	chromosome 9 open reading frame, human C9orf117	3.82158	2.36397
CfaAffx.27099.1.S1_at	ILF3	interleukin enhancer binding factor 3, 90kDa	3.49196	2.36176
Cfa.12126.1.A1_at	GCDH	glutaryl-CoA dehydrogenase	2.79769	2.36088
CfaAffx.3232.1.S1_at	BOP1	block of proliferation 1	2.55931	2.35528
CfaAffx.12138.1.S1_s_at	NLN	neurolysin (metallopeptidase M3 family)	3.25958	2.35404
CfaAffx.21333.1.S1_at	CCR1	chemokine (C-C motif) receptor 1	2.33998	2.35388
CfaAffx.9942.1.S1_s_at	RRM1	ribonucleotide reductase M1	3.03989	2.35165
Cfa.11081.1.S1_at	TUBB	tubulin, beta class I	2.18812	2.34495
CfaAffx.25708.1.S1_s_at	PNPO	pyridoxamine 5'-phosphate oxidase	2.74267	2.33904
Cfa.20908.1.A1_at	ENTPD5	ectonucleoside triphosphate diphosphohydrolase 5	5.83827	2.33288
CfaAffx.2558.1.S1_at	L3MBTL2	l(3)mbt-like 2 (Drosophila)	2.74223	2.32965
Cfa.6575.1.A1_s_at	CLPB	ClpB caseinolytic peptidase B homolog (E. coli)	2.41595	2.32389
Cfa.8044.1.S1_at	CISD3	CDGSH iron sulfur domain 3	4.38484	2.32326
Cfa.5235.1.A1_s_at	TUBB	tubulin, beta class I	2.14393	2.32075
CfaAffx.26760.1.S1_s_at	TDP1	tyrosyl-DNA phosphodiesterase 1	2.43666	2.32024
CfaAffx.6011.1.S1_at	TAF1B	TATA box binding protein (TBP)-associated factor, RNA polymerase I, B, 63kDa	2.44384	2.31348
Cfa.1446.1.A1_at	LRPPRC	leucine-rich pentatricopeptide repeat containing	2.08608	2.31025
CfaAffx.1628.1.S1_s_at	TUBB	tubulin, beta class I	2.37224	2.30989
CfaAffx.7091.1.S1_x_at	LOC102156116	nucleoside diphosphate kinase A-like	2.70255	2.30767
Cfa.6295.1.A1_at	LOC102151621	uncharacterized LOC102151621	3.20174	2.30395
Cfa.20953.1.S1_s_at	ABCE1	ATP-binding cassette, sub-family E (OABP), member 1	2.13935	2.2984
Cfa.17863.1.S1_s_at	HMGCS1	3-hydroxy-3-methylglutaryl-CoA synthase 1 (soluble)	6.42987	2.29831
Cfa.18911.1.S1_s_at	SLC20A1	solute carrier family 20 (phosphate transporter), member 1	5.3499	2.29759
CfaAffx.10831.1.S1_at	MRPL17	mitochondrial ribosomal protein L17	4.93136	2.29473
Cfa.20250.1.S1_s_at	PICALM	phosphatidylinositol binding clathrin assembly protein	2.96906	2.29068
CfaAffx.29217.1.S1_x_at	S100A10	S100 calcium binding protein A10	5.91062	2.29014
Cfa.10353.1.A1_at	C26H12orf52	chromosome 26 open reading frame, human C12orf52	3.33476	2.28732
Cfa.10107.1.A1_a_at	PSMG4	proteasome (prosome, macropain) assembly chaperone 4	2.44056	2.28533
CfaAffx.19607.1.S1_at	CD244	CD244 molecule, natural killer cell receptor 2B4	8.56913	2.28257
Cfa.10560.1.A1_s_at	ATIC	5-aminoimidazole-4-carboxamide ribonucleotide formyltransferase/IMP cyclohydrolase	2.24865	2.28223
CfaAffx.3132.1.S1_s_at	TMEM209	transmembrane protein 209	3.34419	2.28019
Cfa.3742.1.S1_s_at	ALCAM	activated leukocyte cell adhesion molecule	2.35115	2.27885
Cfa.8621.1.A1_s_at	AAAS	achalasia, adrenocortical insufficiency, alacrimia	2.42742	2.27879
CfaAffx.7979.1.S1_s_at	SUV39H2	suppressor of variegation 3-9 homolog 2 (Drosophila)	3.09939	2.27844
CfaAffx.12473.1.S1_at	FAM116A	family with sequence similarity 116, member A	2.93603	2.27398
CfaAffx.26955.1.S1_at	GEMIN5	gem (nuclear organelle) associated protein 5	2.1881	2.27035
Cfa.564.1.A1_at	KDELC1	KDEL (Lys-Asp-Glu-Leu) containing 1	7.75863	2.26522
CfaAffx.19429.1.S1_s_at	WDR12	WD repeat domain 12	3.62721	2.26198
CfaAffx.29071.1.S1_at	MRPL37	mitochondrial ribosomal protein L37	3.64141	2.26174
Cfa.21350.1.S1_at	MCUR1	mitochondrial calcium uniporter regulator 1	2.30002	2.25355
Cfa.10524.1.A1_at	KIAA1524	KIAA1524 ortholog	2.82231	2.25159
CfaAffx.4345.1.S1_s_at	MRPS10	mitochondrial ribosomal protein S10	2.65298	2.25074
Cfa.1304.1.S1_at	HGSNAT	heparan-alpha-glucosaminide N-acetyltransferase	3.67673	2.25068
CfaAffx.20883.1.S1_at	REXO2	RNA exonuclease 2	4.41417	2.24846
CfaAffx.8831.1.S1_at	TRMT61B	tRNA methyltransferase 61 homolog B (S. cerevisiae)	3.06551	2.24794
Cfa.6206.1.A1_a_at	LOC476006	glutathione S-transferase P-like	4.72496	2.24698
Cfa.3413.1.A1_at	RRM1	ribonucleotide reductase M1	2.60886	2.24348
Cfa.2020.1.S1_at	LOC479165	dihydrofolate reductase-like	2.73308	2.24263
CfaAffx.20798.1.S1_at	FASTKD2	FAST kinase domains 2	2.27823	2.24178
CfaAffx.29133.1.S1_s_at	NDC1	NDC1 transmembrane nucleoporin	9.35223	2.23671
Cfa.15282.1.S1_at	CYB5A	cytochrome b5 type A (microsomal)	3.04154	2.23659
CfaAffx.21869.1.S1_at	RANBP1	RAN binding protein 1	3.30368	2.23543
Cfa.20627.1.S1_s_at	RSL1D1	ribosomal L1 domain containing 1	2.48712	2.23506
CfaAffx.30636.1.S1_at	DBT	dihydrolipoamide branched chain transacylase E2	2.34595	2.2332
Cfa.1587.1.A1_s_at	C4H5orf54	chromosome 4 open reading frame, human C5orf54	2.34893	2.23249
Cfa.16941.1.S1_at	PYCR1	pyrroline-5-carboxylate reductase 1	2.23246	2.23081
CfaAffx.24158.1.S1_at	EXO1	exonuclease 1	2.54041	2.22841
CfaAffx.13745.1.S1_s_at	PPID	peptidylprolyl isomerase D	2.2651	2.22601
CfaAffx.17067.1.S1_at	BPNT1	3'(2'), 5'-bisphosphate nucleotidase 1	7.21836	2.22427
Cfa.19527.1.S1_at	LRRC8B	leucine rich repeat containing 8 family, member B	2.5564	2.22385
Cfa.18723.1.S1_s_at	HJURP	Holliday junction recognition protein	2.24425	2.2237
Cfa.2310.1.A1_at	PTGFRN	prostaglandin F2 receptor inhibitor	2.87751	2.22063
CfaAffx.23829.1.S1_s_at	C1QBP	complement component 1, q subcomponent binding protein	2.98323	2.21808
Cfa.18024.1.S1_s_at	NAA38	N(alpha)-acetyltransferase 38, NatC auxiliary subunit	3.62314	2.21588
Cfa.11276.1.S1_s_at	TUBB2A	tubulin, beta 2A class IIa	2.01433	2.21416
Cfa.19771.1.S1_s_at	PMPCA	peptidase (mitochondrial processing) alpha	2.08189	2.21338
Cfa.20501.1.S1_at	FARSA	phenylalanyl-tRNA synthetase, alpha subunit	2.41156	2.21292
Cfa.8415.1.A1_at	CEP164	centrosomal protein 164kDa	4.28486	2.2127
CfaAffx.20940.1.S1_at	TTC30A /// TTC30B	tetratricopeptide repeat domain 30A /// tetratricopeptide repeat domain 30B	2.73841	2.21032
Cfa.2854.1.S1_at	PHYKPL	5-phosphohydroxy-L-lysine phospho-lyase	3.59542	2.20779
CfaAffx.14246.1.S1_at	FAM83D	family with sequence similarity 83, member D	2.20434	2.20434
Cfa.16777.1.S1_s_at	MRPL55	mitochondrial ribosomal protein L55	2.68553	2.20046
CfaAffx.7190.1.S1_s_at	SAE1	SUMO1 activating enzyme subunit 1	2.11272	2.19814
CfaAffx.17817.1.S1_s_at	APEH	acylaminoacyl-peptide hydrolase	2.7895	2.19709
CfaAffx.2651.1.S1_s_at	GUK1	guanylate kinase 1	3.63388	2.19621
Cfa.16858.1.S1_x_at	SCFD2	sec1 family domain containing 2	3.2754	2.19603
CfaAffx.16680.1.S1_s_at	HYAL3	hyaluronoglucosaminidase 3	2.35707	2.19474
Cfa.11409.1.S1_s_at	MZT2B	mitotic spindle organizing protein 2B	2.34482	2.1942
Cfa.1129.2.S1_at	LOC477129	dynamin-like 120 kDa protein, mitochondrial-like	2.48926	2.19372
Cfa.5979.1.A1_s_at	MYCBP	c-myc binding protein	3.32456	2.19282
CfaAffx.26479.1.S1_x_at	NME1 /// NME2	non-metastatic cells 1, protein (NM23A) expressed in /// non-metastatic cells 2, protein (NM23B) expressed in	2.78288	2.19026
Cfa.12131.1.A1_at	CCBL1	cysteine conjugate-beta lyase, cytoplasmic	3.18452	2.18874
Cfa.20501.1.S1_s_at	FARSA	phenylalanyl-tRNA synthetase, alpha subunit	2.84101	2.18336
Cfa.16937.1.S1_s_at	APOPT1	apoptogenic 1, mitochondrial	2.63254	2.17908
CfaAffx.22400.1.S1_s_at	CENPL	centromere protein L	6.60332	2.17866
Cfa.10360.1.A1_at	CLYBL	citrate lyase beta like	2.31174	2.1763
Cfa.20333.1.S1_at	LYRM7	LYR motif containing 7	2.32176	2.17546
Cfa.10199.1.A1_at	CHN2	chimerin 2	2.18696	2.17514
Cfa.7780.1.A1_s_at	RANGRF	RAN guanine nucleotide release factor	3.92582	2.17052
Cfa.2003.1.S1_at	GGCX	gamma-glutamyl carboxylase	3.99657	2.1686
Cfa.7227.1.A1_s_at	SSSCA1	Sjogren syndrome/scleroderma autoantigen 1	5.06598	2.16859
CfaAffx.14561.1.S1_at	GPD2	glycerol-3-phosphate dehydrogenase 2 (mitochondrial)	2.51202	2.16843
Cfa.1223.1.A1_at	PREPL	prolyl endopeptidase-like	2.33781	2.16757
CfaAffx.25138.1.S1_s_at	TMEM109	transmembrane protein 109	2.2785	2.16745
CfaAffx.20937.1.S1_at	YWHAG	tyrosine 3-monooxygenase/tryptophan 5-monooxygenase activation protein, gamma polypeptide	2.26329	2.16595
Cfa.17598.1.S1_s_at	FARSA	phenylalanyl-tRNA synthetase, alpha subunit	2.54009	2.16553
CfaAffx.19191.1.S1_s_at	SEC24D	SEC24 family, member D (S. cerevisiae)	2.52919	2.16522
Cfa.635.1.A1_at	SSRP1	structure specific recognition protein 1	2.4711	2.16417
CfaAffx.6762.1.S1_s_at	PLK4	polo-like kinase 4	2.28333	2.16262
Cfa.7711.3.A1_at	BMP2K	BMP2 inducible kinase	2.13453	2.16251
CfaAffx.9670.1.S1_s_at	MRPL12	mitochondrial ribosomal protein L12	3.95578	2.16144
Cfa.8922.1.A1_at	SRD5A1	steroid-5-alpha-reductase, alpha polypeptide 1 (3-oxo-5 alpha-steroid delta 4-dehydrogenase alpha 1)	3.49701	2.16013
Cfa.635.1.A2_at	SSRP1	structure specific recognition protein 1	2.19529	2.15941
CfaAffx.5535.1.S1_at	TMED4	transmembrane emp24 protein transport domain containing 4	2.77612	2.15872
CfaAffx.19191.1.S1_at	SEC24D	SEC24 family, member D (S. cerevisiae)	3.01057	2.15585
CfaAffx.4990.1.S1_s_at	CDCA7L	cell division cycle associated 7-like	2.39705	2.15445
CfaAffx.11727.1.S1_s_at	RPP30	ribonuclease P/MRP 30kDa subunit	3.40869	2.14993
Cfa.7464.1.A1_at	PPIE	peptidylprolyl isomerase E (cyclophilin E)	2.98697	2.14993
CfaAffx.8260.1.S1_s_at	TMEM177	transmembrane protein 177	3.07573	2.14844
Cfa.13620.2.A1_at	NAA20	N(alpha)-acetyltransferase 20, NatB catalytic subunit	2.01062	2.14729
Cfa.11409.3.S1_s_at	MZT2B	mitotic spindle organizing protein 2B	2.45679	2.14322
CfaAffx.28141.1.S1_at	SNX18	sorting nexin 18	2.32517	2.14299
CfaAffx.13644.1.S1_at	XRCC4	X-ray repair complementing defective repair in Chinese hamster cells 4	3.01885	2.14107
CfaAffx.8776.1.S1_s_at	ULK4	unc-51 like kinase 4	2.17371	2.13816
CfaAffx.16428.1.S1_at	YARS	tyrosyl-tRNA synthetase	2.84485	2.13612
CfaAffx.773.1.S1_x_at	LOC100682542 /// LOC100682882 /// LOC100684481 /// LOC100685611 /// LOC100685924 /// LOC100686103 /// LOC100686340 /// LOC100686354 /// LOC100686364 /// LOC100687042 /// LOC100687166 /// LOC100687285 /// LOC100687764 /// LOC100687973 /// LOC100688002 /// LOC100855964 /// LOC102155427 /// RPL39	60S ribosomal protein L39-like /// 60S ribosomal protein L39-like /// 60S ribosomal protein L39-like /// 60S ribosomal protein L39-like /// 60S ribosomal protein L39-like /// 60S ribosomal protein L39-like /// 60S ribosomal protein L39-like /// 60S ribosomal protein L39-like /// 60S ribosomal protein L39-like /// 60S ribosomal protein L39-like /// 60S ribosomal protein L39-like /// 60S ribosomal …	2.10696	2.13575
Cfa.2100.1.S1_s_at	CWF19L1	CWF19-like 1, cell cycle control (S. pombe)	2.70415	2.13496
CfaAffx.22271.1.S1_s_at	EMG1	EMG1 N1-specific pseudouridine methyltransferase	2.07964	2.13411
CfaAffx.3252.1.S1_at	CNTLN	centlein, centrosomal protein	4.49994	2.13204
Cfa.3246.1.A1_at	LOC608703 /// RPL26	60S ribosomal protein L26-like /// ribosomal protein L26	3.68205	2.12983
CfaAffx.31069.1.S1_s_at	CIRH1A	cirrhosis, autosomal recessive 1A (cirhin)	2.07381	2.12955
CfaAffx.10234.1.S1_s_at	MDH2	malate dehydrogenase 2, NAD (mitochondrial)	3.5144	2.12805
CfaAffx.10412.1.S1_s_at	LDHB	lactate dehydrogenase B	2.1492	2.12766
Cfa.20573.1.S1_s_at	LOC477352	carbonyl reductase family member 4-like	3.50169	2.12678
Cfa.15122.1.S1_at	MRTO4	mRNA turnover 4 homolog (S. cerevisiae)	2.29974	2.12623
Cfa.20861.1.S1_at	PARP3	poly (ADP-ribose) polymerase family, member 3	11.2532	2.12582
Cfa.9351.1.A1_s_at	CAMTA1	calmodulin binding transcription activator 1	6.09469	2.12315
Cfa.15059.1.A1_at	GUK1	guanylate kinase 1	3.14641	2.11243
CfaAffx.8412.1.S1_s_at	ACOX1	acyl-CoA oxidase 1, palmitoyl	2.04235	2.11217
Cfa.15262.3.A1_s_at	PPP1R14B	protein phosphatase 1, regulatory (inhibitor) subunit 14B	3.10885	2.11179
CfaAffx.26841.1.S1_at	S100A4	S100 calcium binding protein A4	3.68366	2.10881
Cfa.10384.1.S1_at	BLOC1S5	biogenesis of lysosomal organelles complex-1, subunit 5, muted	2.04744	2.10341
CfaAffx.3728.1.S1_s_at	POLR1C	polymerase (RNA) I polypeptide C, 30kDa	3.24959	2.10314
CfaAffx.23239.1.S1_s_at	PLA2G5	phospholipase A2, group V	2.03933	2.10311
Cfa.1435.1.A1_at	NVL	nuclear VCP-like	2.06468	2.10237
Cfa.279.1.A1_a_at	CKS1B	CDC28 protein kinase regulatory subunit 1B	2.76744	2.10038
Cfa.20667.1.S1_s_at	ALDH7A1	aldehyde dehydrogenase 7 family, member A1	2.63588	2.09915
CfaAffx.20717.1.S1_at	KIAA1715	KIAA1715 ortholog	2.43087	2.09725
CfaAffx.12283.1.S1_s_at	POP4	processing of precursor 4, ribonuclease P/MRP subunit (S. cerevisiae)	2.34408	2.09602
Cfa.2896.1.S1_at	NASP	nuclear autoantigenic sperm protein (histone-binding)	2.37893	2.09425
Cfa.10142.1.S1_at	BOLA3	bolA family member 3	3.34806	2.09408
Cfa.12077.1.A1_at	LRRC46	leucine rich repeat containing 46	3.7208	2.09216
Cfa.5979.1.A1_at	MYCBP	c-myc binding protein	2.21895	2.09097
Cfa.15176.1.A1_at	TM6SF1	transmembrane 6 superfamily member 1	2.26842	2.08971
CfaAffx.14627.1.S1_s_at	WDFY3	WD repeat and FYVE domain containing 3	3.53702	2.08838
CfaAffx.3372.1.S1_s_at	MRPS10	mitochondrial ribosomal protein S10	2.78728	2.08372
Cfa.21042.1.S1_s_at	MAK16	MAK16 homolog (S. cerevisiae)	3.15466	2.08098
CfaAffx.16277.1.S1_at	ST3GAL4	ST3 beta-galactoside alpha-2,3-sialyltransferase 4	2.50955	2.07433
Cfa.20006.1.S1_s_at	LOC479820	exonuclease NEF-sp	2.06271	2.07205
CfaAffx.1311.1.S1_at	MARS	methionyl-tRNA synthetase	2.34622	2.07111
CfaAffx.7443.1.S1_at	ACAD9	acyl-CoA dehydrogenase family, member 9	3.2146	2.06971
CfaAffx.22271.1.S1_at	EMG1	EMG1 N1-specific pseudouridine methyltransferase	2.07716	2.06966
Cfa.16395.1.S1_s_at	DDX27	DEAD (Asp-Glu-Ala-Asp) box polypeptide 27	2.396	2.06874
Cfa.11625.1.A1_s_at	HMGCR	3-hydroxy-3-methylglutaryl-CoA reductase	3.82061	2.06699
Cfa.580.1.A1_at	TMX3	thioredoxin-related transmembrane protein 3	2.50526	2.06694
CfaAffx.4771.1.S1_s_at	HSPBP1	HSPA (heat shock 70kDa) binding protein, cytoplasmic cochaperone 1	3.04068	2.06265
Cfa.9803.1.A1_at	HDHD2	haloacid dehalogenase-like hydrolase domain containing 2	2.86374	2.05949
Cfa.17148.1.S1_s_at	RFC4	replication factor C (activator 1) 4, 37kDa	2.03214	2.05446
CfaAffx.3333.1.S1_s_at	BYSL	bystin-like	3.80455	2.04653
CfaAffx.19596.1.S1_s_at	ZNF593	zinc finger protein 593	2.95158	2.04519
CfaAffx.24675.1.S1_x_at	LOC100683376	non-metastatic cells 1, protein (NM23A) expressed in pseudogene	2.01531	2.04196
Cfa.2608.1.A1_at	CDC42BPG	CDC42 binding protein kinase gamma (DMPK-like)	2.94216	2.04184
Cfa.18190.1.S1_at	C14H7orf23	chromosome 14 open reading frame, human C7orf23	2.33586	2.04004
Cfa.6921.1.A1_at	LOC100683649	uncharacterized LOC100683649	2.10036	2.03929
CfaAffx.8679.1.S1_s_at	MYO7A	myosin VIIA	2.0367	2.0367
Cfa.17192.1.S1_s_at	ALAD	aminolevulinate dehydratase	4.64419	2.03606
Cfa.2160.1.A1_at	LSM11	LSM11, U7 small nuclear RNA associated	2.50125	2.0274
CfaAffx.30731.1.S1_s_at	CFDP1	craniofacial development protein 1	2.38327	2.02708
CfaAffx.23350.1.S1_at	UXT	ubiquitously-expressed, prefoldin-like chaperone	2.1312	2.0256
Cfa.16937.1.S1_at	APOPT1	apoptogenic 1, mitochondrial	2.62122	2.02236
CfaAffx.30427.1.S1_at	MVD	mevalonate (diphospho) decarboxylase	5.13363	2.02126
Cfa.19161.2.S1_s_at	IARS2	isoleucyl-tRNA synthetase 2, mitochondrial	2.60621	2.02078
CfaAffx.4763.1.S1_at	FAM135A	family with sequence similarity 135, member A	2.85194	2.01886
CfaAffx.26072.1.S1_at	SLC25A35	solute carrier family 25, member 35	3.30245	2.01777
Cfa.19847.1.S1_s_at	PREP	prolyl endopeptidase	2.50927	2.01755
Cfa.4911.1.A1_at	FARSB	phenylalanyl-tRNA synthetase, beta subunit	2.45487	2.01616
CfaAffx.21880.1.S1_s_at	SLC25A39	solute carrier family 25, member 39	4.48996	2.01589
CfaAffx.26078.1.S1_s_at	SLC25A35	solute carrier family 25, member 35	2.23111	2.01248
Cfa.8997.1.A1_at	MMACHC	methylmalonic aciduria (cobalamin deficiency) cblC type, with homocystinuria	4.39958	2.00944
Cfa.16216.1.S1_at	ZNF593	zinc finger protein 593	2.3783	2.00832
Cfa.10515.1.S1_at	WDR12	WD repeat domain 12	2.81456	2.00716
CfaAffx.9000.1.S1_s_at	HGSNAT	heparan-alpha-glucosaminide N-acetyltransferase	3.96457	2.00635
Cfa.7780.1.A1_at	RANGRF	RAN guanine nucleotide release factor	2.74288	2.00454
Cfa.20019.1.S1_s_at	PIK3CB	phosphatidylinositol-4,5-bisphosphate 3-kinase, catalytic subunit beta	2.75486	2.0037
Cfa.11221.1.A1_at	BPNT1	3'(2'), 5'-bisphosphate nucleotidase 1	6.28413	2.00354
CfaAffx.5323.1.S1_at	POLD2	polymerase (DNA directed), delta 2, accessory subunit	2.38758	2.00331
CfaAffx.24935.1.S1_s_at	SMC1A	structural maintenance of chromosomes 1A	3.87838	2.00134
Cfa.2463.1.A1_at	CYB5A	cytochrome b5 type A (microsomal)	2.23746	2.00006

## Sheet: Legend
Lists of differentially expressed probesets with fold change. Sheet 1 depicts all genes, which were upregulated in M1- vs. M0-macrophages and simultaneously downregulated in M2- vs M1-macrophages (i.e. canine M1-macrophage genes). Sheet 2 shows all genes, which were upregulated in M2- vs. M0-macrophages and simultaneously upregulated in M2- vs M1-macrophages (i.e. canine M2-macrophage genes).
FC = fold change
